# Supplementary material
Source: Royal Society of Chemistry journal article supplement (doi:10.1039/d6dt01115b)
Supplement: d6dt01115b1.pdf [file d6dt01115b1.pdf]

## Structural Insights Into Heavy Chalcogen Polycations and Their Stabilization via (Hydrogen)polysulfates.

Jan Langwald,<sup>a</sup> Sergi Burguera,<sup>b</sup> Antonio Frontera<sup>\*b</sup> and Mathias S. Wickleder<sup>\*a</sup>

<sup>a</sup> *Institute of Inorganic and Materials Chemistry, University of Cologne, Greinstr. 6, 50939 Cologne, Germany.  
E-mail: mathias.wickleder@uni-koeln.de*

<sup>b</sup> *Universitat de les Illes Balears, Crta de Valldemossa km 7.5, 07122 Palma de Mallorca, Balears, Spain.  
E-mail: toni.frontera@uib.es*

### Table of Contents

|                                                                                 |           |
|---------------------------------------------------------------------------------|-----------|
| <b>A. Synthesis</b> .....                                                       | <b>2</b>  |
| <b>B. Structure Determination and Crystallographic Details</b> .....            | <b>3</b>  |
| [Se <sub>4</sub> ][HS <sub>2</sub> O <sub>7</sub> ] <sub>2</sub> (1) .....      | 4         |
| [Se <sub>4</sub> ][S <sub>2</sub> O <sub>7</sub> ] (2) .....                    | 9         |
| [Se <sub>4</sub> ][HS <sub>3</sub> O <sub>10</sub> ] <sub>2</sub> (3) .....     | 15        |
| [Te <sub>4</sub> ][HS <sub>3</sub> O <sub>10</sub> ] <sub>2</sub> (4) .....     | 22        |
| [Te <sub>6</sub> ][HS <sub>3</sub> O <sub>10</sub> ] <sub>4</sub> -I (5) .....  | 27        |
| [Te <sub>6</sub> ][HS <sub>3</sub> O <sub>10</sub> ] <sub>4</sub> -II (6) ..... | 37        |
| [Te <sub>6</sub> ][S <sub>4</sub> O <sub>13</sub> ] <sub>2</sub> (7) .....      | 56        |
| <b>D. Delta Values</b> .....                                                    | <b>65</b> |
| <b>E. Spectroscopic investigations</b> .....                                    | <b>67</b> |
| <b>F. Computational Details</b> .....                                           | <b>69</b> |

## A. Synthesis

### General Procedure

SO<sub>3</sub> was obtained in a specially designed apparatus for the generation, distillation and subsequent transfer into glass ampoules under nitrogen gas. For this purpose, fuming sulfuric acid (65% SO<sub>3</sub>, used as received, Merck, Darmstadt, Germany) was added via a dropping funnel into a 500 mL flask with P<sub>4</sub>O<sub>10</sub> (250 g, >97%, Merck, Darmstadt) with a dosage rate of 1 mL / minute. At the same time, the flask was heated at 130 °C and the generated SO<sub>3</sub> distilled into a connected burette body (scaling 0.01 ml). A connected glass ampoule (*l* = 200 mm, *ø* = 16 mm, thickness of the tube wall = 1.80 mm) containing the solid starting materials was then filled with the required amount of SO<sub>3</sub>.

1,2-Dichloroethane was refluxed with P<sub>4</sub>O<sub>10</sub> for ~5 h, followed by distillation and storage over molecular sieves (4 Å) prior to use. Selenoyl chloride (SeOCl<sub>2</sub>) was prepared according to literature procedures and its purity confirmed *via* <sup>77</sup>Se NMR spectroscopy ([CDCl<sub>3</sub>]:1496 ppm, s).<sup>[1-2]</sup>

### Synthesis of [Se<sub>4</sub>][HS<sub>2</sub>O<sub>7</sub>]<sub>2</sub> (1)

Compound **1** was previously isolated and reported by Gillespie in the space group *P2*<sub>1</sub>/*c*.<sup>[3]</sup> We herein report two additional preparative routes yielding large amounts of crystalline material. We revisited the compound for improved data quality and subsequent quantum chemical calculations. We used the nowadays more common space group *P2*<sub>1</sub>/*n* (transformation matrix: 1 0 -1; 0 -1 0; 0 0 -1).

165.4 mg (2.09 mmol, 1.00 eq.) of Selenium powder (99+%, ACROS Organics) and 0.12 mL (1.80 mmol, 0.86 eq.) of Chlorosulfuric acid (97%, Thermo Scientific) were filled into a preheated glass ampoule (3.3 borosilicate). 0.20 mL SO<sub>3</sub> (5.00 mmol, 2.39 eq.) were condensed on top and the ampoule was sealed under reduced pressure (1·10<sup>-3</sup> mbar) with a gas burner. The reaction vessel was heated to 80 °C within 24 h, dwelled at this temperature for 48 h and cooled down to room temperature (in the following 'r.t.') within 90 h. After cooling, bright orange crystals could be isolated from the mother liquor. The conversion is quantitative.

Product **1** could also be isolated after the reaction of 162.0 mg (2.05 mmol, 1.00 eq.) Selenium powder with 0.10 mL (1.27 mmol, 0.62 eq.) of 1,2-Dichloroethane and 0.20 mL SO<sub>3</sub> (5.00 mmol, 2.44 eq.).

### Synthesis of [Se<sub>4</sub>][S<sub>2</sub>O<sub>7</sub>] (2)

204.4 mg (0.98 mmol, 1.00 eq.) of elemental Bismuth (99.5%, Alfa Aesar) and 0.20 mL (2.93 mmol, 2.99 eq.) of SeOCl<sub>2</sub> were filled into a preheated glass ampoule (3.3 borosilicate). 0.20 mL SO<sub>3</sub> (5.00 mmol, 5.11 eq.) were condensed on top and the ampoule was sealed under reduced pressure (1·10<sup>-3</sup> mbar) with a gas burner. The reaction vessel was heated to 80 °C within 24 h, dwelled at this temperature for 6 h and cooled down to r.t. within 90 h. After cooling, bright orange crystals could be isolated as a byproduct from the high-viscous mother liquor. The main product [SeCl<sub>3</sub>][Bi(S<sub>2</sub>O<sub>7</sub>)<sub>2</sub>] will be reported separately.<sup>[4]</sup>

### Synthesis of [Se<sub>4</sub>][HS<sub>3</sub>O<sub>10</sub>]<sub>2</sub> (3)

80.6 mg (1.02 mmol, 1.00 eq.) of Selenium powder (99+%, ACROS Organics) and 0.12 mL (1.80 mmol, 1.76 eq.) of Chlorosulfuric acid (97%, Thermo Scientific) were filled into a preheated glass ampoule (3.3 borosilicate). 0.20 mL SO<sub>3</sub> (5.00 mmol, 4.90 eq.) were condensed on top and the ampoule was sealed under reduced pressure (1·10<sup>-3</sup> mbar) with a gas burner. The resulting dark-green solution was stored at -20 °C. Within a period of 3 weeks, the solution turned yellow and bright yellow crystals grew from the mother liquid.

### Synthesis of [Te<sub>4</sub>][HS<sub>3</sub>O<sub>10</sub>]<sub>2</sub> (3), [Te<sub>6</sub>][HS<sub>3</sub>O<sub>10</sub>]<sub>4</sub> (4), [Te<sub>6</sub>][HS<sub>3</sub>O<sub>10</sub>]<sub>4</sub>-I (5) and [Te<sub>6</sub>][HS<sub>3</sub>O<sub>10</sub>]<sub>4</sub>-II

131.5 mg (1.03 mmol, 1.00 eq.) of Tellurium powder (99.80%, ACROS Organics) and 0.12 mL (1.80 mmol, 1.75 eq.) of Chlorosulfuric acid (97%, Thermo Scientific) were filled into a preheated glass ampoule (3.3 borosilicate). 0.20 mL SO<sub>3</sub> (5.00 mmol, 4.90 eq.) were condensed on top and the ampoule was sealed under reduced pressure (1·10<sup>-3</sup> mbar) with a gas burner. The resulting berry-red solution was stored at 7 °C. After 24 h, colourless and red crystals grew from the mother liquid. The red single crystals were identified as product 3, whereby the colourless crystals could be identified as products 4 and 5 + 6, respectively. They can only be differentiated by small variations in the crystal morphology.

### Synthesis of [Te<sub>6</sub>][S<sub>4</sub>O<sub>13</sub>]<sub>2</sub> (7)

128.6 mg (1.01 mmol, 1.00 eq.) of Tellurium powder (99.80%, ACROS Organics) and 0.30 mL (4.13 mmol, 4.09 eq.) of SO<sub>2</sub>Cl<sub>2</sub> (Sigma-Aldrich) were filled into a preheated glass ampoule (3.3 borosilicate). 0.60 mL SO<sub>3</sub> (15.00 mmol, 14.85 eq.) were condensed on top and the ampoule was sealed under reduced pressure (1·10<sup>-3</sup> mbar) with a gas burner. The resulting solution was stored at 7 °C. After 24 h, slightly yellow crystals and colorless crystals grew from the mother liquid. The yellow single crystals were identified as product 7, whereby the colourless crystals could be identified Te[S<sub>2</sub>O<sub>7</sub>]<sub>2</sub>.<sup>[5]</sup>

## B. Structure Determination and Crystallographic Details

### General Procedure

The single crystal structure determination was performed on a *Bruker D8 VENTURE KAPPA* diffractometer with a microfocus sealed tube using a multilayer mirror as the monochromator and a *Bruker PHOTON III* detector. As characteristic X-ray radiation MoK<sub>α</sub> (λ = 71.073 pm) was used for the measurements. Before the measurements, the crystals were prepared in perfluorinated ether oil (Fomblin® YR-180) and selected using a light microscope with equipped polarization filter. A suitable single crystal was fixed on a MiTeGen micromount (150 μm polymer loop) and adjusted to the X-ray beam and cooled down to 100 K in a stream of N<sub>2</sub>. The images with the intensity data were processed using the software *APEX5*.<sup>[6]</sup> The frames were integrated with the Bruker *SAINTE* software package using a narrow frame algorithm. Absorption effects were corrected using SADABS for the multi-scan absorption correction.<sup>[7-8]</sup> The structure solution and refinement were done with the software *OLEX2*.<sup>[9]</sup> Dual methods using *SHELXT* were used for structure solution and full-matrix least-squares methods against *F*<sup>2</sup> using *SHELXL* for the refinement.<sup>[10-11]</sup> All illustrations of the crystal structures were made with the program *Diamond 4* using the .cif as the input file.<sup>[12]</sup>

### Powder X-Ray Diffraction and Rietveld Refinement

P-XRD data was collected on a *Stoe Stadi-P* powder diffractometer with a *Mythen* detector and a Debye–Scherrer geometry by using Mo-K<sub>α1</sub> radiation of λ = 0.70930 Å. The samples were ground and sealed in glass capillaries with 0.5 mm or 0.3 mm diameter. The data was recorded in a range of 2θ = 0 - 60° within 10.5 h. The Rietveld refinement was performed using the software *TOPAS-Academic (64 V6)*.<sup>[13-14]</sup> The refinement process included the scale factor, lattice parameters, atomic positions and the isotropic atomic displacement parameters for a.) all atoms except hydrogen (compound 1) and b.) only the selenium atoms (mixture of compound 1 and compound 2), along with corrections for zero shift, specimen displacement, and background. Peak profiles were described using the pseudo-Voigt function of Thompson, Cox, and Hastings,<sup>[15]</sup> with the profile shape parameters u, v, w, and y refined accordingly.

**[Se<sub>4</sub>][HS<sub>2</sub>O<sub>7</sub>]<sub>2</sub> (1)****Table S1:** Crystallographic data of [Se<sub>4</sub>][HS<sub>2</sub>O<sub>7</sub>]<sub>2</sub>.

|                                                     |                                                                          |
|-----------------------------------------------------|--------------------------------------------------------------------------|
| Empirical formula                                   | H <sub>2</sub> O <sub>14</sub> S <sub>4</sub> Se <sub>4</sub>            |
| Formula weight                                      | 670.10 g/mol                                                             |
| Temperature                                         | 100.00 K                                                                 |
| Crystal system                                      | monoclinic                                                               |
| Space group                                         | <i>P</i> 2 <sub>1</sub> / <i>n</i> (No. 14)                              |
| Unit cell dimensions                                | <i>a</i> = 768.7(1) pm                                                   |
|                                                     | <i>b</i> = 555.53(8) pm                                                  |
|                                                     | <i>c</i> = 1620.1(3) pm                                                  |
|                                                     | <i>β</i> = 96.965(5)°                                                    |
| Volume                                              | 686.8(2) Å <sup>3</sup>                                                  |
| <i>Z</i>                                            | 2                                                                        |
| $\rho_{\text{calc}}$                                | 3.241 g/cm <sup>3</sup>                                                  |
| $\mu$                                               | 11.365 mm <sup>-1</sup>                                                  |
| F(000)                                              | 628                                                                      |
| Crystal size                                        | 0.39 × 0.09 × 0.08 mm <sup>3</sup>                                       |
| Radiation                                           | MoK $\alpha$ ( $\lambda$ = 0.71073 nm)                                   |
| 2 $\Theta$ range for data collection                | 5.626 to 60.994                                                          |
| Index ranges                                        | -10 ≤ <i>h</i> ≤ 10, -7 ≤ <i>k</i> ≤ 7, -23 ≤ <i>l</i> ≤ 23              |
| Reflections collected                               | 22721                                                                    |
| Independent reflections                             | 2079 [ <i>R</i> <sub>int</sub> = 0.0591, <i>R</i> <sub>σ</sub> = 0.0359] |
| Completeness                                        | 99.5%                                                                    |
| Absorption correction                               | multiscan                                                                |
| Min. and max. transmission                          | 0.281 / 0.746                                                            |
| Data/restraints/parameters                          | 2079/0/105                                                               |
| Goodness-of-fit on F <sup>2</sup>                   | 1.086                                                                    |
| Final <i>R</i> indexes [ <i>I</i> ≥ 2σ( <i>I</i> )] | <i>R</i> <sub>1</sub> = 0.0264, <i>wR</i> <sub>2</sub> = 0.0657          |
| Final <i>R</i> indexes [all data]                   | <i>R</i> <sub>1</sub> = 0.0269, <i>wR</i> <sub>2</sub> = 0.0661          |
| Largest diff. peak/hole                             | 1.00/-0.82 e · Å <sup>-3</sup>                                           |
| CCDC-No.                                            | 2477856                                                                  |

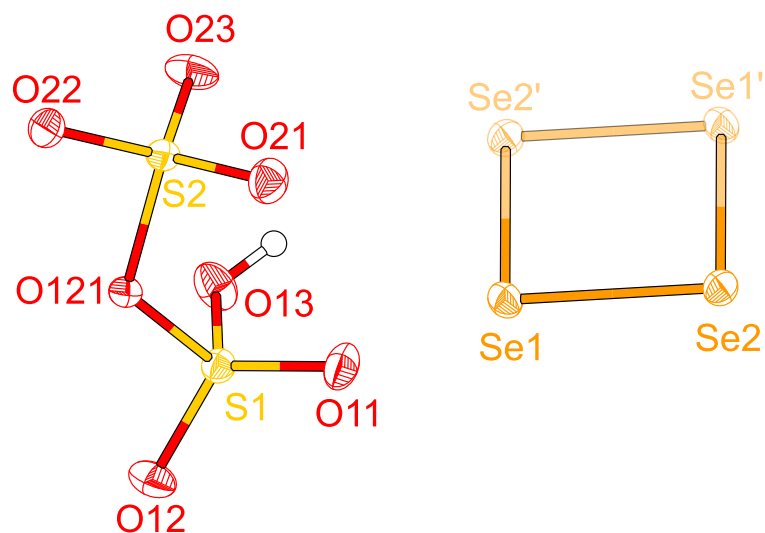

**Figure S1:** Thermal ellipsoid plot of the asymmetric unit of  $[\text{Se}_4][\text{HS}_2\text{O}_7]_2$  shown with 50% probability. Atoms that are generated by symmetry operation for complete representation of the cation are shown at 50% visibility.

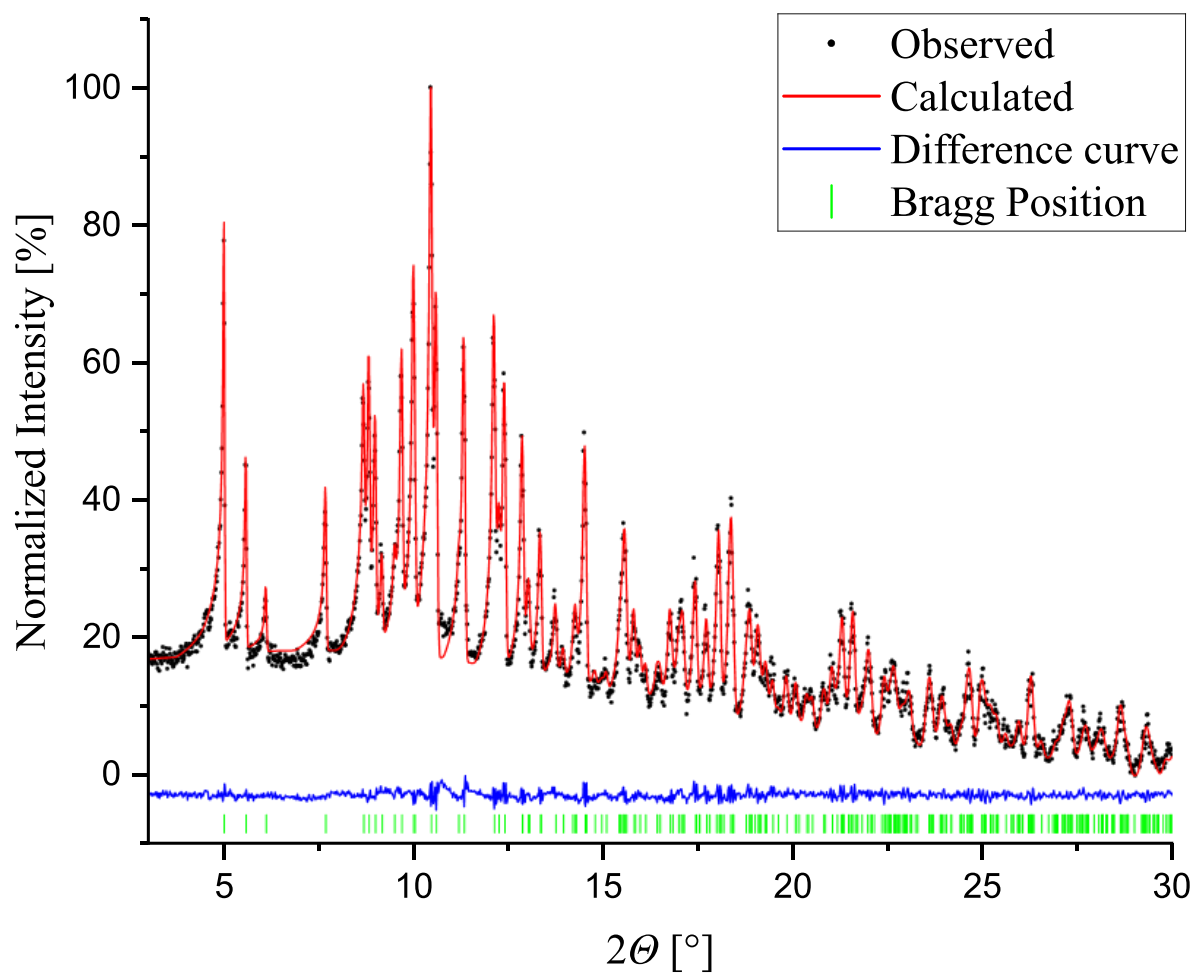

**Figure S 2:** Powder X-Ray Diffraction Pattern from the prepared  $[\text{Se}_4][\text{HS}_2\text{O}_7]_2$  (black) versus the calculated curve (red). The difference curve is shown below in blue. Experimental and calculated data were normalized to  $[0, 100]$  and the difference data to  $[-5, 0]$ , respectively.

**Table S2:** Fractional Atomic Coordinates ( $\times 10^4$ ) and Equivalent Isotropic Displacement Parameters ( $\text{\AA}^2 \times 10^3$ ) for  $[\text{Se}_4][\text{HS}_2\text{O}_7]_2$ .  $U_{\text{eq}}$  is defined as 1/3 of the trace of the orthogonalised  $U_{\text{ij}}$  tensor.

| Atom | $x$        | $y$       | $z$        | $U(\text{eq})$ |
|------|------------|-----------|------------|----------------|
| Se1  | 10124.7(3) | 7737.8(4) | 4382.2(2)  | 10.30(9)       |
| Se2  | 7894.1(3)  | 9703.0(4) | 4909.1(2)  | 10.25(9)       |
| S1   | 5392.7(6)  | 8400.9(9) | 2447.4(3)  | 8.99(11)       |
| S2   | 4861.8(7)  | 5402.4(8) | 3829.6(3)  | 8.95(12)       |
| O11  | 6952(2)    | 9242(3)   | 2923.8(10) | 13.8(3)        |
| O12  | 5319(2)    | 7941(3)   | 1584.6(10) | 13.6(3)        |
| O13  | 3842(2)    | 10048(3)  | 2566.2(11) | 14.5(3)        |
| O21  | 6663(2)    | 5604(3)   | 4193.1(10) | 14.0(3)        |
| O22  | 4190(2)    | 2971(3)   | 3814.9(10) | 14.1(3)        |
| O23  | 3716(2)    | 7213(3)   | 4100.4(11) | 15.5(3)        |
| O121 | 4857(2)    | 5881(3)   | 2817.9(9)  | 9.8(3)         |

**Table S3:** Anisotropic Displacement Parameters ( $\text{\AA}^2 \times 10^3$ ) for  $[\text{Se}_4][\text{HS}_2\text{O}_7]_2$ . The anisotropic displacement factor exponent takes the form:  $-2\pi^2[h^2a^{*2}U_{11}+2hka^*b^*U_{12}+\dots]$ .

| Atom | $U_{11}$  | $U_{22}$  | $U_{33}$  | $U_{23}$  | $U_{13}$ | $U_{12}$  |
|------|-----------|-----------|-----------|-----------|----------|-----------|
| Se1  | 10.68(13) | 9.75(12)  | 10.63(13) | -2.84(6)  | 1.97(8)  | -0.13(6)  |
| Se2  | 7.49(12)  | 12.05(12) | 11.31(13) | -1.63(6)  | 1.51(8)  | -0.40(6)  |
| S1   | 8.7(2)    | 9.3(2)    | 8.9(2)    | 0.50(16)  | 0.77(16) | -0.38(16) |
| S2   | 9.6(2)    | 9.1(2)    | 8.5(2)    | -0.87(15) | 2.46(17) | -0.63(16) |
| O11  | 10.9(7)   | 14.6(7)   | 15.2(7)   | 1.9(6)    | -1.2(6)  | -4.2(6)   |
| O12  | 18.6(8)   | 14.0(7)   | 8.4(7)    | 0.4(5)    | 2.5(6)   | 2.1(6)    |
| O13  | 13.8(8)   | 14.0(7)   | 15.0(8)   | -4.1(6)   | -1.0(6)  | 4.0(6)    |
| O21  | 12.1(7)   | 15.6(7)   | 13.5(7)   | 1.2(5)    | -1.0(6)  | -1.8(5)   |
| O22  | 19.7(8)   | 10.6(6)   | 12.6(7)   | -0.7(5)   | 4.6(6)   | -6.2(6)   |
| O23  | 19.4(8)   | 15.6(7)   | 12.8(7)   | -2.1(6)   | 7.2(6)   | 4.8(6)    |
| O121 | 11.8(7)   | 10.4(6)   | 7.7(6)    | -1.0(5)   | 2.8(5)   | -2.7(5)   |

**Table S4:** Bond Lengths for [Se<sub>4</sub>][HS<sub>2</sub>O<sub>7</sub>]<sub>2</sub> in pm.

| Atom | Atom             | Length/pm  | Atom | Atom | Length/pm  |
|------|------------------|------------|------|------|------------|
| Se1  | Se2              | 228.37(4)  | S1   | O121 | 159.70(15) |
| Se1  | Se2 <sup>1</sup> | 228.80(3)  | S2   | O21  | 144.15(17) |
| S1   | O11              | 142.36(16) | S2   | O22  | 144.52(15) |
| S1   | O12              | 141.53(17) | S2   | O23  | 144.02(16) |
| S1   | O13              | 153.30(17) | S2   | O121 | 166.00(16) |

<sup>1</sup>2-X, 2-Y, 1-Z**Table S5:** Bond Angles for [Se<sub>4</sub>][HS<sub>2</sub>O<sub>7</sub>]<sub>2</sub>.

| Atom | Atom | Atom             | Angle/°    | Atom | Atom | Atom | Angle/°    |
|------|------|------------------|------------|------|------|------|------------|
| Se2  | Se1  | Se2 <sup>1</sup> | 89.980(14) | O21  | S2   | O22  | 113.78(10) |
| Se1  | Se2  | Se1 <sup>1</sup> | 90.021(14) | O21  | S2   | O121 | 106.13(9)  |
| O11  | S1   | O13              | 110.64(10) | O22  | S2   | O121 | 100.09(9)  |
| O11  | S1   | O121             | 108.81(9)  | O23  | S2   | O21  | 114.44(10) |
| O12  | S1   | O11              | 121.68(11) | O23  | S2   | O22  | 115.29(10) |
| O12  | S1   | O13              | 107.03(10) | O23  | S2   | O121 | 105.11(9)  |
| O12  | S1   | O121             | 103.39(9)  | S1   | O121 | S2   | 122.80(9)  |
| O13  | S1   | O121             | 103.66(9)  |      |      |      |            |

<sup>1</sup>2-X, 2-Y, 1-Z**Table S6:** Torsion Angles for [Se<sub>4</sub>][HS<sub>2</sub>O<sub>7</sub>]<sub>2</sub>.

| A   | B  | C    | D  | Angle/°    | A   | B  | C    | D  | Angle/°    |
|-----|----|------|----|------------|-----|----|------|----|------------|
| O11 | S1 | O121 | S2 | 45.43(14)  | O21 | S2 | O121 | S1 | -64.80(13) |
| O12 | S1 | O121 | S2 | 176.08(11) | O22 | S2 | O121 | S1 | 176.67(11) |
| O13 | S1 | O121 | S2 | -72.35(13) | O23 | S2 | O121 | S1 | 56.83(14)  |

**Table S7:** Hydrogen Atom Coordinates ( $\text{\AA} \times 10^4$ ) and Isotropic Displacement Parameters ( $\text{\AA}^2 \times 10^3$ ) for [Se<sub>4</sub>][HS<sub>2</sub>O<sub>7</sub>]<sub>2</sub>.

| Atom | x        | y        | z        | U(eq)  |
|------|----------|----------|----------|--------|
| H13  | 4080(50) | 10800(7) | 2960(30) | 30(10) |

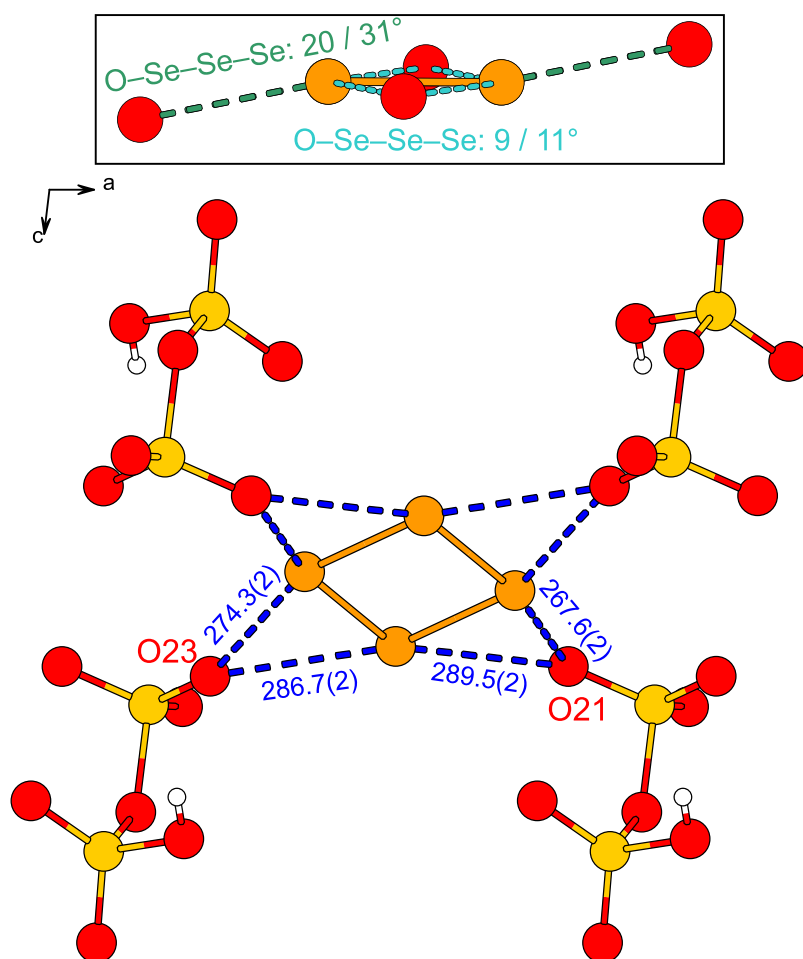

**Figure S 3:** Chalcogen-bonding (D–A distance below 300 pm) within  $[\text{Se}_4][\text{HS}_2\text{O}_7]_2$ . Distances are given in pm. O–Se coordination within the  $[\text{Se}_4]$  plane and O–Se–Se–Se torsion angles are shown at the top.

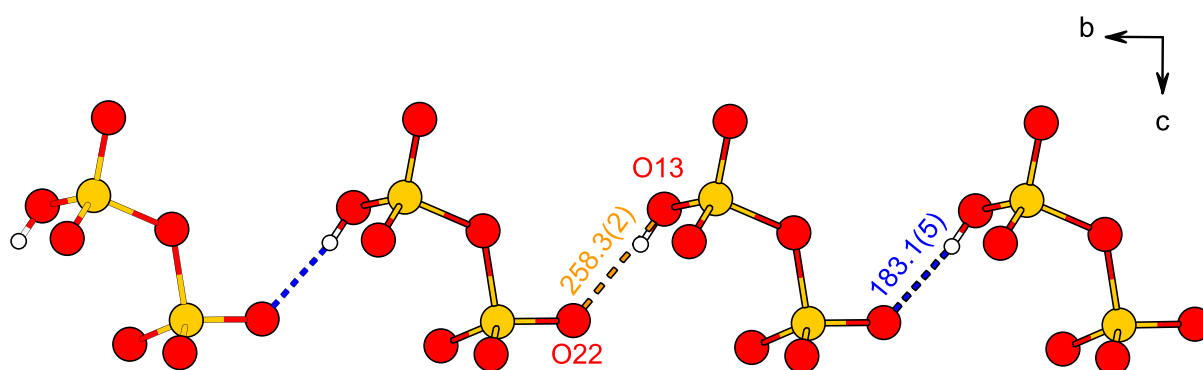

**Figure S 4:** Hydrogen-bonding within  $[\text{Se}_4][\text{HS}_2\text{O}_7]_2$ . Distances are given in pm.

**[Se<sub>4</sub>][S<sub>2</sub>O<sub>7</sub>] (2)****Table S8:** Crystallographic data of [Se<sub>4</sub>][S<sub>2</sub>O<sub>7</sub>].

|                                                      |                                                                          |
|------------------------------------------------------|--------------------------------------------------------------------------|
| Empirical formula                                    | O <sub>7</sub> S <sub>2</sub> Se <sub>4</sub>                            |
| Formula weight                                       | 491.96 g/mol                                                             |
| Temperature                                          | 100.00 K                                                                 |
| Crystal system                                       | monoclinic                                                               |
| Space group                                          | <i>P</i> 2 <sub>1</sub> / <i>c</i> (No. 14)                              |
| Unit cell dimensions                                 | <i>a</i> = 557.77(4) pm                                                  |
|                                                      | <i>b</i> = 2237.38(16) pm                                                |
|                                                      | <i>c</i> = 711.12(5) pm                                                  |
|                                                      | <i>β</i> = 100.154(2)°                                                   |
| Volume                                               | 873.54(11) Å <sup>3</sup>                                                |
| <i>Z</i>                                             | 4                                                                        |
| $\rho_{\text{calc}}$                                 | 3.741 g/cm <sup>3</sup>                                                  |
| $\mu$                                                | 17.278 mm <sup>-1</sup>                                                  |
| F(000)                                               | 869                                                                      |
| Crystal size                                         | 0.5 × 0.2 × 0.15 mm <sup>3</sup>                                         |
| Radiation                                            | MoK $\alpha$ ( $\lambda$ = 0.71073 nm)                                   |
| 2 $\Theta$ range for data collection                 | 6.098 to 61.04                                                           |
| Index ranges                                         | -6 ≤ <i>h</i> ≤ 7, -31 ≤ <i>k</i> ≤ 31, -10 ≤ <i>l</i> ≤ 10              |
| Reflections collected                                | 35113                                                                    |
| Independent reflections                              | 2599 [ <i>R</i> <sub>int</sub> = 0.0552, <i>R</i> <sub>σ</sub> = 0.0302] |
| Completeness                                         | 98.1%                                                                    |
| Absorption correction                                | multiscan                                                                |
| Min. and max. transmission                           | 0.357 / 0.746                                                            |
| Data/restraints/parameters                           | 2599/0/119                                                               |
| Goodness-of-fit on F <sup>2</sup>                    | 1.142                                                                    |
| Final <i>R</i> indexes [ <i>I</i> ≥ 2σ ( <i>I</i> )] | <i>R</i> <sub>1</sub> = 0.0221, <i>wR</i> <sub>2</sub> = 0.0455          |
| Final <i>R</i> indexes [all data]                    | <i>R</i> <sub>1</sub> = 0.0241, <i>wR</i> <sub>2</sub> = 0.0471          |
| Largest diff. peak/hole                              | 1.00/-0.98 e · Å <sup>-3</sup>                                           |
| CCDC-No.                                             | 2504489                                                                  |

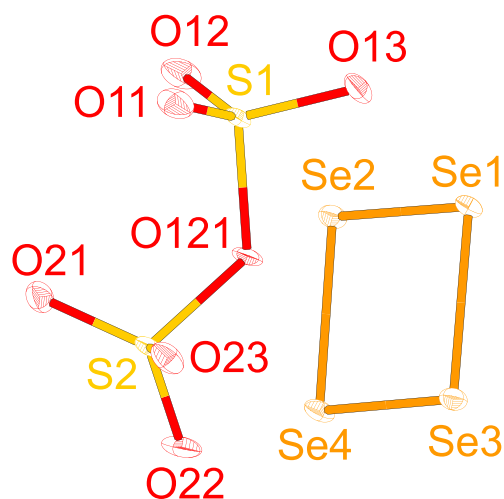

**Figure S5:** Thermal ellipsoid plot of the asymmetric unit of  $[\text{Se}_4][\text{S}_2\text{O}_7]$  shown with 50% probability. Atoms that are generated by symmetry operation for complete representation of the cation are shown at 50% visibility.

**Table S9:** Fractional Atomic Coordinates ( $\times 10^4$ ) and Equivalent Isotropic Displacement Parameters ( $\text{\AA}^2 \times 10^3$ ) for  $[\text{Se}_4][\text{S}_2\text{O}_7]$ .  $U_{\text{eq}}$  is defined as 1/3 of the trace of the orthogonalised  $U_{ij}$  tensor.

| Atom | <i>x</i>  | <i>y</i>  | <i>z</i>   | <i>U</i> (eq) |
|------|-----------|-----------|------------|---------------|
| Se1  | 4411.2(4) | 3057.2(2) | -1543.1(3) | 9.20(6)       |
| Se2  | 6819.5(4) | 3465.8(2) | -3497.4(3) | 10.09(6)      |
| Se3  | 2852.8(4) | 3979.7(2) | -1114.2(3) | 10.15(6)      |
| Se4  | 5201.9(4) | 4388.8(2) | -3105.1(3) | 10.84(6)      |
| S1   | 9729.9(9) | 3143.9(2) | 2407.2(7)  | 8.51(10)      |
| S2   | 9213.7(9) | 4412.1(2) | 2865.1(7)  | 9.07(10)      |
| O11  | 11092(3)  | 3199.8(7) | 4306(2)    | 16.7(3)       |
| O12  | 11184(3)  | 3101.4(7) | 922(3)     | 19.6(4)       |
| O13  | 7743(3)   | 2719.9(7) | 2191(2)    | 14.3(3)       |
| O21  | 11731(3)  | 4448.7(7) | 2675(2)    | 14.2(3)       |
| O22  | 7583(3)   | 4814.2(7) | 1660(2)    | 16.5(3)       |
| O23  | 8803(3)   | 4388.1(7) | 4826(2)    | 13.8(3)       |
| O121 | 8193(3)   | 3770.6(6) | 1931(2)    | 12.3(3)       |

**Table S10:** Anisotropic Displacement Parameters ( $\text{\AA}^2 \times 10^3$ ) for  $[\text{Se}_4][\text{S}_2\text{O}_7]$ . The anisotropic displacement factor exponent takes the form:  $-2\pi^2[h^2a^2U_{11}+2hka*b*U_{12}+\dots]$ .

| Atom | $U_{11}$  | $U_{22}$ | $U_{33}$  | $U_{23}$  | $U_{13}$ | $U_{12}$  |
|------|-----------|----------|-----------|-----------|----------|-----------|
| Se1  | 12.15(10) | 5.23(10) | 10.29(11) | 0.71(7)   | 2.19(7)  | -0.23(7)  |
| Se2  | 12.2(1)   | 7.28(10) | 11.59(11) | -0.73(7)  | 4.23(7)  | 0.32(7)   |
| Se3  | 11.62(10) | 7.16(10) | 12.32(11) | -0.64(7)  | 3.90(7)  | 0.97(7)   |
| Se4  | 14.93(10) | 5.54(10) | 12.55(11) | 1.67(7)   | 3.81(8)  | 0.22(7)   |
| S1   | 11.6(2)   | 3.8(2)   | 10.4(2)   | 0.05(16)  | 2.62(17) | -0.26(16) |
| S2   | 12.8(2)   | 4.1(2)   | 10.8(2)   | -1.12(16) | 3.20(17) | -0.10(16) |
| O11  | 20.8(8)   | 11.0(7)  | 15.5(8)   | 2.2(6)    | -4.6(6)  | 1.1(6)    |
| O12  | 25.9(9)   | 11.5(8)  | 26.0(10)  | -1.0(6)   | 17.5(7)  | 0.3(6)    |
| O13  | 15.9(7)   | 7.8(7)   | 18.8(8)   | 0.6(6)    | 2.1(6)   | -4.0(6)   |
| O21  | 14.1(7)   | 11.7(7)  | 18.6(8)   | -2.9(6)   | 7.8(6)   | -2.9(6)   |
| O22  | 22.9(8)   | 6.9(7)   | 18.7(8)   | 0.6(6)    | 0.5(6)   | 4.9(6)    |
| O23  | 20.2(8)   | 10.3(7)  | 12.5(8)   | -2.5(6)   | 7.3(6)   | -3.2(6)   |
| O121 | 14.7(7)   | 3.9(7)   | 16.5(8)   | -2.1(5)   | -2.3(6)  | 1.6(5)    |

**Table S11:** Bond Lengths for  $[\text{Se}_4][\text{S}_2\text{O}_7]$  in pm.

| Atom | Atom | Length/pm  | Atom | Atom | Length/pm  |
|------|------|------------|------|------|------------|
| Se1  | Se2  | 228.69(3)  | S1   | O13  | 144.62(16) |
| Se1  | Se3  | 228.09(3)  | S1   | O121 | 164.69(15) |
| Se2  | Se4  | 229.04(3)  | S2   | O21  | 143.65(16) |
| Se3  | Se4  | 228.32(3)  | S2   | O22  | 144.75(16) |
| S1   | O11  | 143.31(17) | S2   | O23  | 145.36(17) |
| S1   | O12  | 144.38(18) | S2   | O121 | 164.08(15) |

**Table S12:** Bond Angles for [Se<sub>4</sub>][S<sub>2</sub>O<sub>7</sub>].

| Atom | Atom | Atom | Angle/°    | Atom | Atom | Atom | Angle/°    |
|------|------|------|------------|------|------|------|------------|
| Se3  | Se1  | Se2  | 89.886(11) | O13  | S1   | O121 | 100.10(9)  |
| Se1  | Se2  | Se4  | 90.013(11) | O21  | S2   | O22  | 115.56(10) |
| Se1  | Se3  | Se4  | 90.344(11) | O21  | S2   | O23  | 114.47(10) |
| Se3  | Se4  | Se2  | 89.741(10) | O21  | S2   | O121 | 106.67(9)  |
| O11  | S1   | O12  | 114.97(11) | O22  | S2   | O23  | 113.71(10) |
| O11  | S1   | O13  | 115.24(10) | O22  | S2   | O121 | 99.63(9)   |
| O11  | S1   | O121 | 106.83(9)  | O23  | S2   | O121 | 104.71(9)  |
| O12  | S1   | O13  | 113.43(10) | S2   | O121 | S1   | 122.06(10) |
| O12  | S1   | O121 | 104.17(9)  |      |      |      |            |

**Table S13:** Torsion Angles for [Se<sub>4</sub>][S<sub>2</sub>O<sub>7</sub>].

| A   | B  | C    | D  | Angle/°    | A   | B  | C    | D  | Angle/°    |
|-----|----|------|----|------------|-----|----|------|----|------------|
| O11 | S1 | O121 | S2 | 30.39(15)  | O21 | S2 | O121 | S1 | 45.76(15)  |
| O12 | S1 | O121 | S2 | -91.69(14) | O22 | S2 | O121 | S1 | 166.27(13) |
| O13 | S1 | O121 | S2 | 150.82(12) | O23 | S2 | O121 | S1 | -75.94(14) |

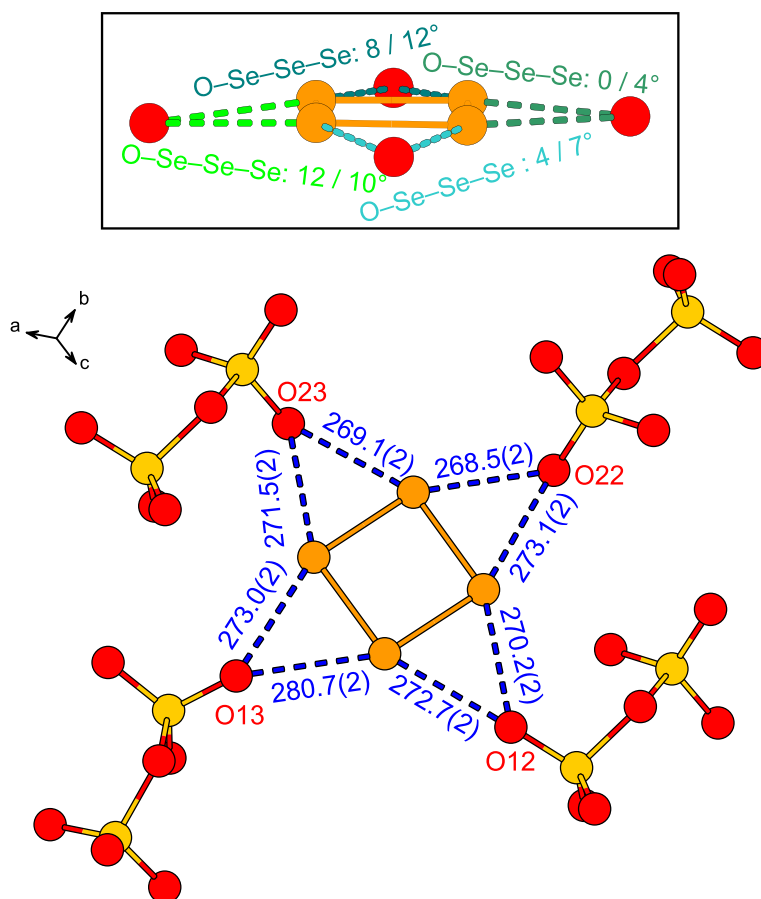

**Figure S 6:** Chalcogen-bonding (D–A distance below 300 pm) within  $[\text{Se}_4][\text{S}_2\text{O}_7]$ . Distances are given in pm. O–Se coordination within the  $[\text{Se}_4]$  plane and O–Se–Se–Se torsion angles are shown at the top.

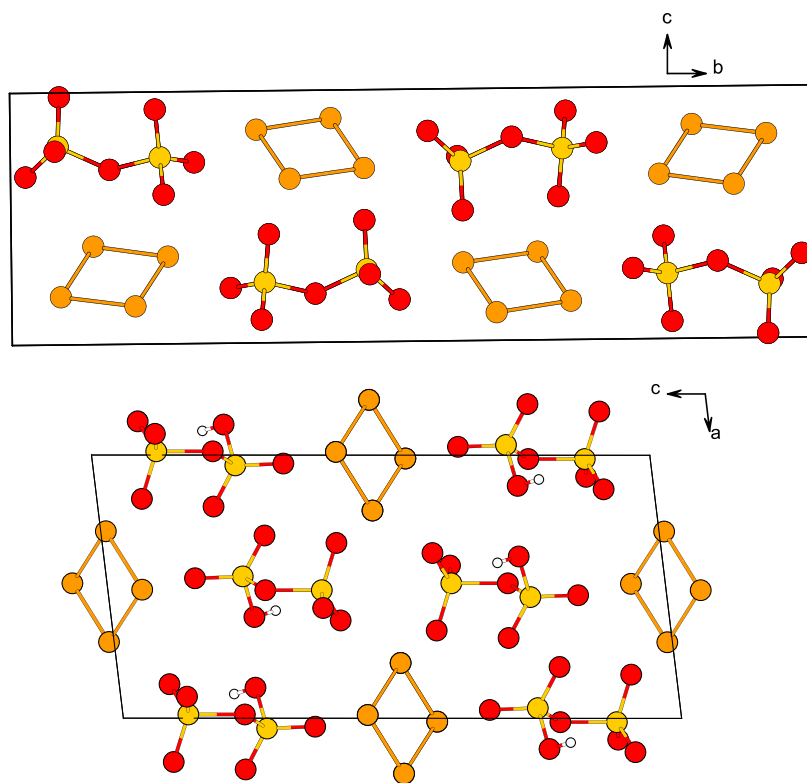

**Figure S 7:** Packed unit cells of [Se4][S2O7] (top) and [Se4][HS2O7]2 (bottom) viewed along the crystallographic a- and b-axis, respectively.

**[Se<sub>4</sub>][HS<sub>3</sub>O<sub>10</sub>]<sub>2</sub> (3)****Table S14:** Crystallographic data of [Se<sub>4</sub>][HS<sub>3</sub>O<sub>10</sub>]<sub>2</sub>.

|                                                      |                                                                          |
|------------------------------------------------------|--------------------------------------------------------------------------|
| Empirical formula                                    | H <sub>2</sub> O <sub>20</sub> S <sub>6</sub> Se <sub>4</sub>            |
| Formula weight                                       | 830.22 g/mol                                                             |
| Temperature                                          | 100.00 K                                                                 |
| Crystal system                                       | monoclinic                                                               |
| Space group                                          | <i>P</i> 2 <sub>1</sub> / <i>n</i> (No. 14)                              |
| Unit cell dimensions                                 | <i>a</i> = 967.36(7) pm                                                  |
|                                                      | <i>b</i> = 983.62(6) pm                                                  |
|                                                      | <i>c</i> = 1987.30(7) pm                                                 |
|                                                      | <i>β</i> = 95.883(3)°                                                    |
| Volume                                               | 934.48(11) Å <sup>3</sup>                                                |
| <i>Z</i>                                             | 2                                                                        |
| $\rho_{\text{calc}}$                                 | 2.951 g/cm <sup>3</sup>                                                  |
| $\mu$                                                | 8.622 mm <sup>-1</sup>                                                   |
| F(000)                                               | 788                                                                      |
| Crystal size                                         | 0.06 × 0.03 × 0.03 mm <sup>3</sup>                                       |
| Radiation                                            | MoK $\alpha$ ( $\lambda$ = 0.71073 nm)                                   |
| 2 $\Theta$ range for data collection                 | 5.616 to 57.382                                                          |
| Index ranges                                         | -13 ≤ <i>h</i> ≤ 12, -13 ≤ <i>k</i> ≤ 13, -13 ≤ <i>l</i> ≤ 13            |
| Reflections collected                                | 15582                                                                    |
| Independent reflections                              | 2411 [ <i>R</i> <sub>int</sub> = 0.0581, <i>R</i> <sub>σ</sub> = 0.0415] |
| Completeness                                         | 100%                                                                     |
| Absorption correction                                | multiscan                                                                |
| Min. and max. transmission                           | 0.595 / 0.746                                                            |
| Data/restraints/parameters                           | 2411/0/137                                                               |
| Goodness-of-fit on F <sup>2</sup>                    | 1.057                                                                    |
| Final <i>R</i> indexes [ <i>I</i> ≥ 2σ ( <i>I</i> )] | <i>R</i> <sub>1</sub> = 0.0378, <i>wR</i> <sub>2</sub> = 0.0847          |
| Final <i>R</i> indexes [all data]                    | <i>R</i> <sub>1</sub> = 0.0521, <i>wR</i> <sub>2</sub> = 0.0908          |
| Largest diff. peak/hole                              | 1.00/-0.72 e · Å <sup>-3</sup>                                           |
| CCDC-No.                                             | 2476927                                                                  |

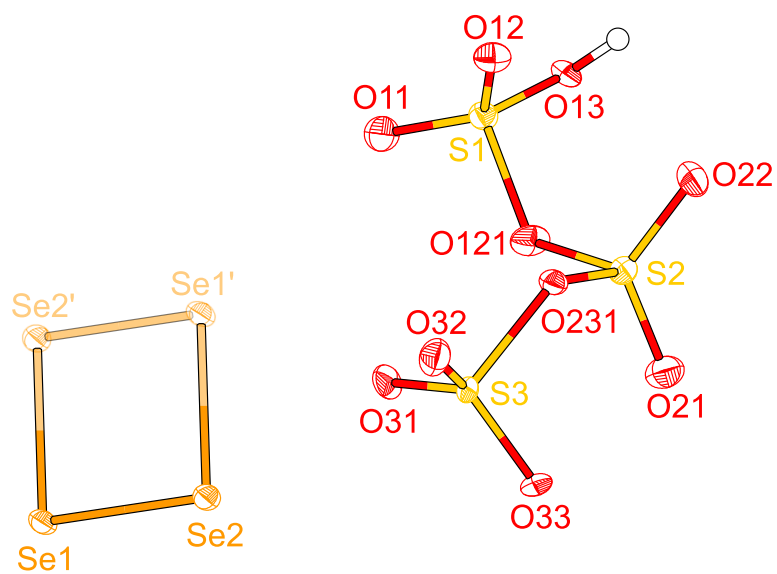

**Figure S8:** Thermal ellipsoid plot of the asymmetric unit of  $[\text{Se}_4][\text{HS}_3\text{O}_{10}]_2$  shown with 50% probability. Atoms that are generated by symmetry operation for complete representation of the cation are shown at 50% visibility.

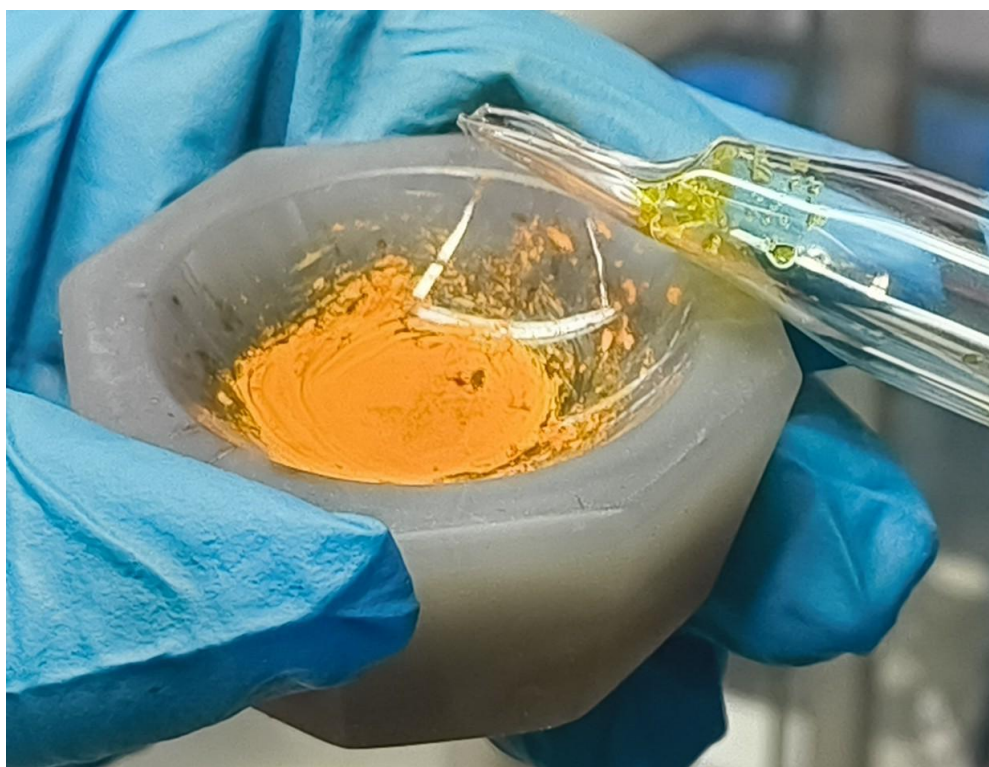

**Figure S 9:** Single crystals of  $[\text{Se}_4][\text{HS}_3\text{O}_{10}]_2$  in a freshly cracked glass ampoule (right) and powdered sample in a mortar (left).

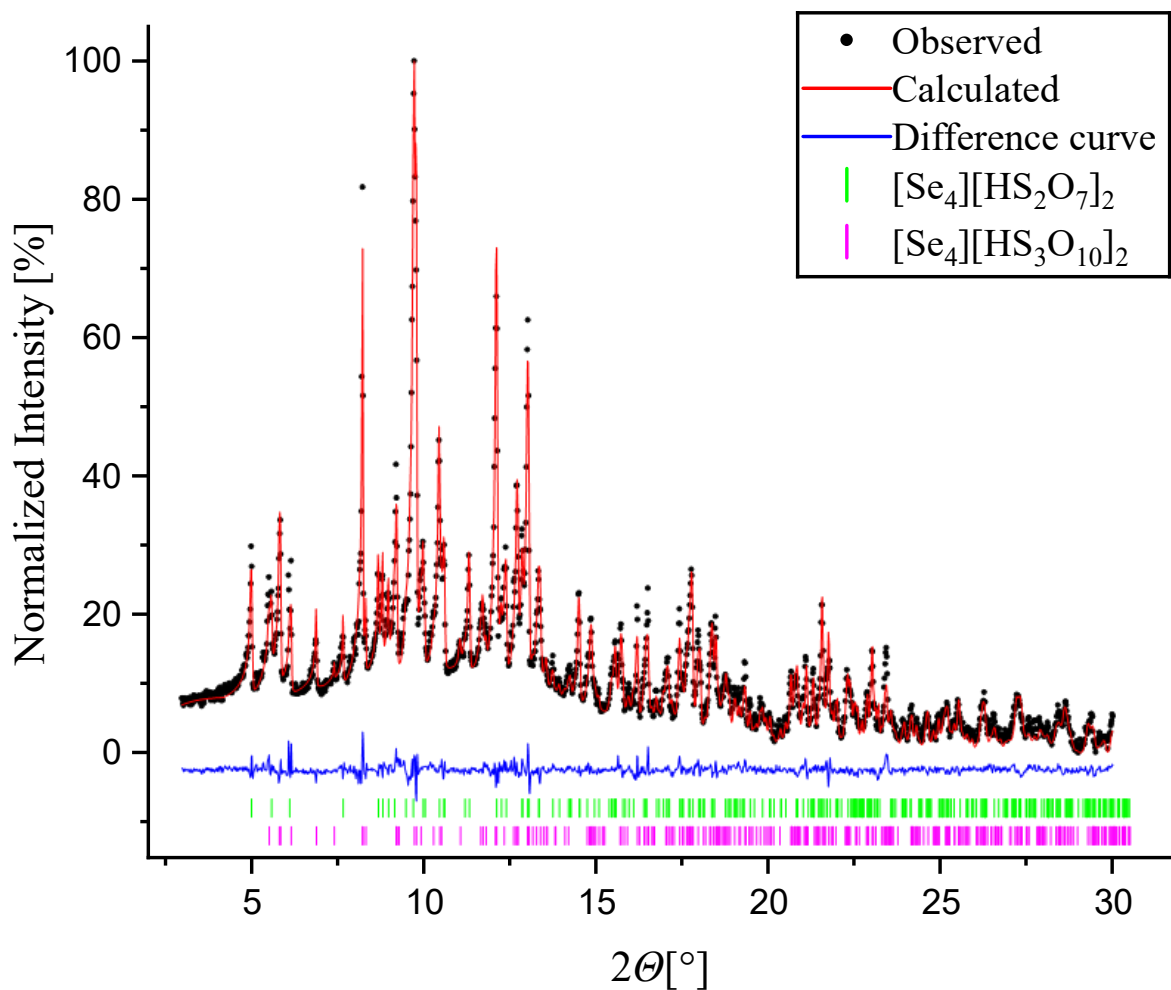

**Figure S 10:** Powder X-Ray Diffraction Pattern from the prepared [Se<sub>4</sub>][HS<sub>3</sub>O<sub>10</sub>]<sub>2</sub> (black) versus the calculated curve (red). The difference curve is shown below in blue. Experimental and calculated data were normalized to [0, 100] and the difference data to [-7, 3], respectively. The Bragg positions for [Se<sub>4</sub>][HS<sub>2</sub>O<sub>7</sub>]<sub>2</sub> and [Se<sub>4</sub>][HS<sub>3</sub>O<sub>10</sub>]<sub>2</sub> from single crystal data are shown as green and magenta bars, respectively.

**Table S15:** Fractional Atomic Coordinates ( $\times 10^4$ ) and Equivalent Isotropic Displacement Parameters ( $\text{\AA}^2 \times 10^3$ ) for  $[\text{Se}_4][\text{HS}_3\text{O}_{10}]_2$ .  $U_{\text{eq}}$  is defined as 1/3 of the trace of the orthogonalised  $U_{ij}$  tensor.

| Atom | $x$        | $y$        | $z$        | $U(\text{eq})$ |
|------|------------|------------|------------|----------------|
| Se1  | 5354.0(5)  | 8908.8(4)  | 3856.3(4)  | 12.79(13)      |
| Se2  | 3874.7(5)  | 10714.2(4) | 3906.6(4)  | 13.12(13)      |
| S1   | 5142.0(12) | 5006.7(11) | 1984.7(11) | 13.2(2)        |
| S2   | 7060.5(12) | 3877.5(11) | 4078.0(11) | 13.8(2)        |
| S3   | 8461.1(12) | 6290.2(10) | 5176.5(11) | 12.6(2)        |
| O11  | 4269(4)    | 6142(3)    | 2046(3)    | 21.1(8)        |
| O12  | 6304(3)    | 5021(3)    | 1229(3)    | 17.3(7)        |
| O13  | 4192(4)    | 3716(3)    | 1674(3)    | 21.8(8)        |
| O21  | 6876(4)    | 3491(4)    | 5424(3)    | 20.9(7)        |
| O22  | 7306(4)    | 2909(3)    | 3077(3)    | 22.2(8)        |
| O31  | 7190(3)    | 7042(3)    | 4980(3)    | 18.3(7)        |
| O32  | 9651(4)    | 6877(3)    | 4654(3)    | 19.6(7)        |
| O33  | 8733(4)    | 5639(3)    | 6471(3)    | 16.3(7)        |
| O121 | 5674(3)    | 4728(3)    | 3588(3)    | 18.0(7)        |
| O231 | 8196(3)    | 4989(3)    | 4031(3)    | 12.2(6)        |

**Table S16:** Anisotropic Displacement Parameters ( $\text{\AA}^2 \times 10^3$ ) for  $[\text{Se}_4][\text{HS}_3\text{O}_{10}]_2$ . The anisotropic displacement factor exponent takes the form:  $-2\pi^2[h^2a^*U_{11}+2hka^*b^*U_{12}+\dots]$ .

| Atom | $U_{11}$ | $U_{22}$ | $U_{33}$ | $U_{23}$  | $U_{13}$  | $U_{12}$ |
|------|----------|----------|----------|-----------|-----------|----------|
| Se1  | 14.1(2)  | 13.1(2)  | 10.6(2)  | -3.62(16) | -1.14(17) | 3.80(17) |
| Se2  | 14.0(2)  | 13.5(2)  | 11.0(2)  | -1.87(16) | -3.08(16) | 4.59(17) |
| S1   | 13.1(5)  | 13.5(5)  | 12.5(5)  | -1.3(4)   | -0.7(4)   | 1.4(4)   |
| S2   | 15.6(6)  | 13.0(5)  | 12.4(5)  | 0.7(4)    | -1.4(4)   | 1.6(4)   |
| S3   | 17.0(6)  | 9.3(5)   | 10.6(5)  | 0.4(4)    | -3.0(4)   | 4.8(4)   |
| O11  | 21.5(19) | 22.1(17) | 19.2(17) | -0.7(14)  | -0.2(14)  | 7.6(14)  |
| O12  | 16.4(17) | 21.6(17) | 14.0(16) | -1.0(13)  | 2.3(13)   | -0.1(14) |
| O13  | 37(2)    | 15.2(16) | 12.4(16) | -5.2(13)  | -0.7(15)  | 8.0(15)  |
| O21  | 24.0(19) | 22.8(17) | 15.5(16) | 1.5(14)   | -0.6(14)  | -3.6(15) |
| O22  | 30(2)    | 14.6(15) | 20.6(18) | -4.3(14)  | -2.4(15)  | 3.0(15)  |
| O31  | 17.7(18) | 15.9(15) | 19.9(17) | -4.4(13)  | -5.0(14)  | 9.2(14)  |
| O32  | 21.4(18) | 15.4(16) | 21.3(17) | 3.0(13)   | -1.1(14)  | -1.1(14) |
| O33  | 22.9(18) | 17.4(16) | 7.6(14)  | 0.9(12)   | -3.2(13)  | 3.4(14)  |
| O121 | 11.2(16) | 27.5(18) | 14.5(16) | -1.4(14)  | -2.7(13)  | 5.6(14)  |
| O231 | 13.4(16) | 13.1(14) | 10.2(14) | -1.6(11)  | 1.4(12)   | 1.7(12)  |

**Table S17:** Bond Lengths for  $[\text{Se}_4][\text{HS}_3\text{O}_{10}]_2$  in pm.

| Atom | Atom             | Length/pm | Atom | Atom | Length/pm |
|------|------------------|-----------|------|------|-----------|
| Se1  | Se2              | 228.44(6) | S2   | O22  | 141.0(3)  |
| Se1  | Se2 <sup>1</sup> | 228.80(6) | S2   | O121 | 161.3(3)  |
| S1   | O11              | 140.5(3)  | S2   | O231 | 155.4(3)  |
| S1   | O12              | 141.2(3)  | S3   | O31  | 143.1(3)  |
| S1   | O13              | 157.9(4)  | S3   | O32  | 143.0(4)  |
| S1   | O121             | 163.6(3)  | S3   | O33  | 143.0(3)  |
| S2   | O21              | 141.1(3)  | S3   | O231 | 171.0(3)  |

<sup>1</sup>1-X, 2-Y, 1-Z

**Table S18:** Bond Angles for [Se<sub>4</sub>][HS<sub>3</sub>O<sub>10</sub>]<sub>2</sub>.

| Atom | Atom | Atom             | Angle/°    | Atom | Atom | Atom | Angle/°    |
|------|------|------------------|------------|------|------|------|------------|
| Se2  | Se1  | Se2 <sup>1</sup> | 89.77(2)   | O22  | S2   | O121 | 109.5(2)   |
| Se1  | Se2  | Se1 <sup>1</sup> | 90.23(2)   | O22  | S2   | O231 | 106.5(2)   |
| O11  | S1   | O12              | 122.0(2)   | O231 | S2   | O121 | 101.22(18) |
| O11  | S1   | O13              | 107.9(2)   | O31  | S3   | O231 | 103.21(17) |
| O11  | S1   | O121             | 102.85(19) | O32  | S3   | O31  | 117.1(2)   |
| O12  | S1   | O13              | 112.60(19) | O32  | S3   | O33  | 115.0(2)   |
| O12  | S1   | O121             | 108.94(18) | O32  | S3   | O231 | 97.76(18)  |
| O13  | S1   | O121             | 99.92(18)  | O33  | S3   | O31  | 115.4(2)   |
| O21  | S2   | O121             | 103.9(2)   | O33  | S3   | O231 | 104.94(17) |
| O21  | S2   | O231             | 112.07(19) | S2   | O121 | S1   | 123.1(2)   |
| O22  | S2   | O21              | 121.7(2)   | S2   | O231 | S3   | 124.42(19) |

<sup>1</sup>1-X, 2-Y, 1-Z**Table S19:** Torsion Angles for [Se<sub>4</sub>][HS<sub>3</sub>O<sub>10</sub>]<sub>2</sub>.

| A   | B  | C    | D  | Angle/°   | A    | B  | C    | D  | Angle/°   |
|-----|----|------|----|-----------|------|----|------|----|-----------|
| O11 | S1 | O121 | S2 | -159.1(3) | O22  | S2 | O231 | S3 | -172.5(2) |
| O12 | S1 | O121 | S2 | -28.4(3)  | O31  | S3 | O231 | S2 | -63.2(3)  |
| O13 | S1 | O121 | S2 | 89.8(3)   | O32  | S3 | O231 | S2 | 176.5(2)  |
| O21 | S2 | O121 | S1 | -160.7(3) | O33  | S3 | O231 | S2 | 58.0(3)   |
| O21 | S2 | O231 | S3 | -37.1(3)  | O121 | S2 | O231 | S3 | 73.0(2)   |
| O22 | S2 | O121 | S1 | -29.2(3)  | O231 | S2 | O121 | S1 | 83.0(3)   |

**Table S20:** Hydrogen Atom Coordinates (Å×10<sup>4</sup>) and Isotropic Displacement Parameters (Å<sup>2</sup>×10<sup>3</sup>) for [Se<sub>4</sub>][HS<sub>3</sub>O<sub>10</sub>]<sub>2</sub>.

| Atom | x       | y       | z       | U(eq) |
|------|---------|---------|---------|-------|
| H13  | 4650.97 | 3104.28 | 1329.64 | 33    |

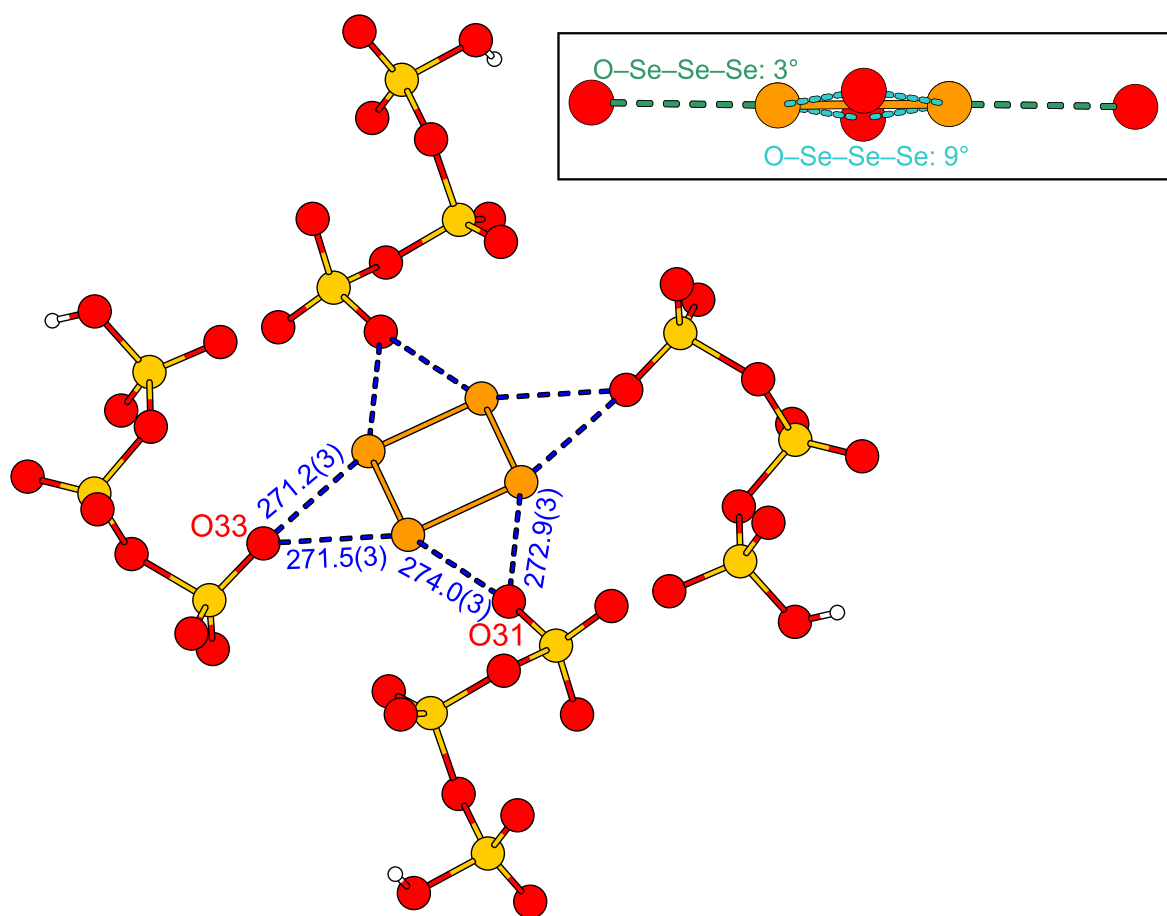

**Figure S 11:** Chalcogen-bonding (D–A distance below 300 pm) within  $[\text{Se}_4][\text{HS}_3\text{O}_{10}]_2$ . Distances are given in pm. O–Se coordination within the  $[\text{Se}_4]$  plane and O–Se–Se–Se torsion angles are shown in the top right corner.

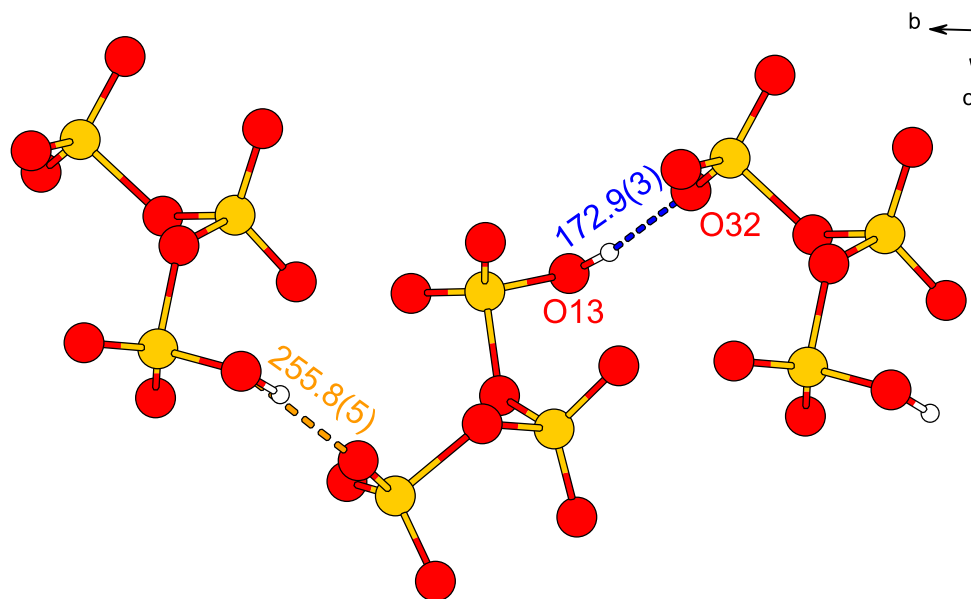

**Figure S 12:** Hydrogen-bonding within  $[\text{Se}_4][\text{HS}_3\text{O}_{10}]_2$ . Distances are given in pm.

**[Te<sub>4</sub>][HS<sub>3</sub>O<sub>10</sub>]<sub>2</sub> (4)****Table S21:** Crystallographic data of [Te<sub>4</sub>][HS<sub>3</sub>O<sub>10</sub>]<sub>2</sub>.

|                                                     |                                                                          |
|-----------------------------------------------------|--------------------------------------------------------------------------|
| Empirical formula                                   | H <sub>2</sub> O <sub>20</sub> S <sub>6</sub> Te <sub>4</sub>            |
| Formula weight                                      | 1024.78 g/mol                                                            |
| Temperature                                         | 100.00 K                                                                 |
| Crystal system                                      | monoclinic                                                               |
| Space group                                         | <i>P</i> 2 <sub>1</sub> / <i>n</i> (No. 14)                              |
| Unit cell dimensions                                | <i>a</i> = 1003.36(3) pm                                                 |
|                                                     | <i>b</i> = 1014.61(2) pm                                                 |
|                                                     | <i>c</i> = 1044.79(3) pm                                                 |
|                                                     | <i>β</i> = 96.4010(10)°                                                  |
| Volume                                              | 1056.99(5) Å <sup>3</sup>                                                |
| <i>Z</i>                                            | 2                                                                        |
| $\rho_{\text{calc}}$                                | 3.220 g/cm <sup>3</sup>                                                  |
| $\mu$                                               | 6.146 mm <sup>-1</sup>                                                   |
| F(000)                                              | 932                                                                      |
| Crystal size                                        | 0.11 × 0.03 × 0.01 mm <sup>3</sup>                                       |
| Radiation                                           | MoK $\alpha$ ( $\lambda$ = 0.71073 nm)                                   |
| 2 $\Theta$ range for data collection                | 5.34 to 59.142                                                           |
| Index ranges                                        | -13 ≤ <i>h</i> ≤ 12, -14 ≤ <i>k</i> ≤ 11, -14 ≤ <i>l</i> ≤ 14            |
| Reflections collected                               | 10436                                                                    |
| Independent reflections                             | 2951 [ <i>R</i> <sub>int</sub> = 0.0415, <i>R</i> <sub>σ</sub> = 0.0388] |
| Completeness                                        | 99.9%                                                                    |
| Absorption correction                               | Multiscan                                                                |
| Min. and max. transmission                          | 0.633 / 0.747                                                            |
| Data/restraints/parameters                          | 2951/0/137                                                               |
| Goodness-of-fit on F <sup>2</sup>                   | 1.069                                                                    |
| Final <i>R</i> indexes [ <i>I</i> ≥ 2σ( <i>I</i> )] | <i>R</i> <sub>1</sub> = 0.0313, <i>wR</i> <sub>2</sub> = 0.0643          |
| Final <i>R</i> indexes [all data]                   | <i>R</i> <sub>1</sub> = 0.0400, <i>wR</i> <sub>2</sub> = 0.0681          |
| Largest diff. peak/hole                             | 1.22/-0.91 e · Å <sup>-3</sup>                                           |
| CCDC-No.                                            | 2476926                                                                  |

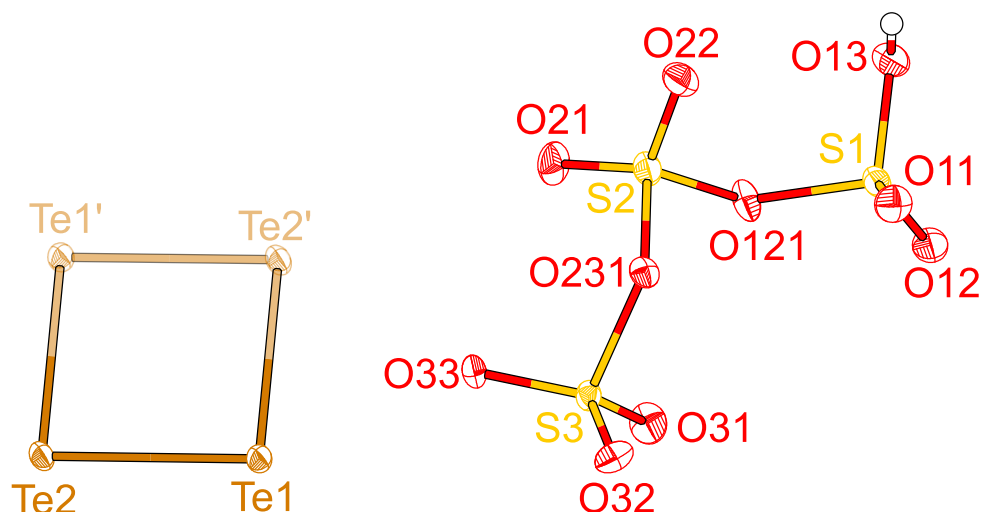

**Figure S13:** Thermal ellipsoid plot of the asymmetric unit of  $[\text{Te}_4][\text{HS}_3\text{O}_{10}]_2$  shown with 50% probability. Atoms that are generated by symmetry operation for complete representation of the cation are shown at 50% visibility.

**Table S22:** Fractional Atomic Coordinates ( $\times 10^4$ ) and Equivalent Isotropic Displacement Parameters ( $\text{\AA}^2 \times 10^3$ ) for  $[\text{Te}_4][\text{HS}_3\text{O}_{10}]_2$ .  $U_{\text{eq}}$  is defined as 1/3 of the trace of the orthogonalised  $U_{\text{ij}}$  tensor.

| Atom | x          | y          | z          | $U_{\text{eq}}$ |
|------|------------|------------|------------|-----------------|
| Te1  | 1283.3(3)  | 6194.3(3)  | -483.2(3)  | 13.42(8)        |
| Te2  | 1277.7(3)  | 4323.1(3)  | 1308.6(3)  | 14.08(8)        |
| S1   | 8024.1(11) | 5054.1(10) | 4689.5(11) | 14.5(2)         |
| S2   | 5794.8(11) | 4099.4(11) | 2999.5(11) | 15.9(2)         |
| S3   | 5057.0(11) | 6348.4(10) | 1393.8(11) | 12.9(2)         |
| O11  | 8754(3)    | 4975(3)    | 3607(3)    | 20.5(7)         |
| O12  | 8113(3)    | 6179(3)    | 5494(3)    | 20.0(7)         |
| O13  | 8207(4)    | 3816(3)    | 5510(3)    | 19.7(7)         |
| O21  | 4426(3)    | 4002(3)    | 3163(3)    | 22.2(7)         |
| O22  | 6610(3)    | 2978(3)    | 2910(3)    | 23.1(8)         |
| O31  | 5184(4)    | 7141(3)    | 2527(3)    | 22.0(7)         |
| O32  | 5757(3)    | 6787(3)    | 346(3)     | 19.0(7)         |
| O33  | 3756(3)    | 5812(3)    | 1020(3)    | 19.6(7)         |
| O121 | 6418(3)    | 5001(3)    | 4195(3)    | 18.7(7)         |
| O231 | 6025(3)    | 4999(3)    | 1826(3)    | 13.2(6)         |

**Table S23:** Anisotropic Displacement Parameters ( $\text{\AA}^2 \times 10^3$ ) for  $[\text{Te}_4][\text{HS}_3\text{O}_{10}]_2$ . The anisotropic displacement factor exponent takes the form:  $-2\pi^2[h^2a^*U_{11}+2hka^*b^*U_{12}+\dots]$ .

| Atom | U <sub>11</sub> | U <sub>22</sub> | U <sub>33</sub> | U <sub>23</sub> | U <sub>13</sub> | U <sub>12</sub> |
|------|-----------------|-----------------|-----------------|-----------------|-----------------|-----------------|
| Te1  | 10.03(14)       | 15.39(13)       | 14.48(15)       | 4.99(10)        | -0.26(10)       | -2.57(10)       |
| Te2  | 10.61(14)       | 16.99(14)       | 13.78(15)       | 5.43(11)        | -2.47(10)       | -1.2(1)         |
| S1   | 12.7(5)         | 14.7(5)         | 15.3(5)         | -0.6(4)         | -1.6(4)         | 2.4(4)          |
| S2   | 13.6(5)         | 17.8(5)         | 15.6(5)         | -0.7(4)         | -1.5(4)         | 0.6(4)          |
| S3   | 11.0(5)         | 11.7(4)         | 15.3(5)         | -3.5(4)         | -1.0(4)         | 0.4(4)          |
| O11  | 19.3(17)        | 21.8(16)        | 21.1(18)        | 0.3(13)         | 5.1(14)         | 0.0(13)         |
| O12  | 20.6(18)        | 16.1(15)        | 22.7(18)        | -3.6(13)        | 0.1(14)         | 2.4(13)         |
| O13  | 21.6(18)        | 20.0(16)        | 17.1(17)        | 1.7(13)         | 0.4(14)         | 2.4(13)         |
| O21  | 13.4(16)        | 32.1(18)        | 21.6(18)        | 4.2(14)         | 4.4(14)         | -5.9(14)        |
| O22  | 23.0(18)        | 17.3(15)        | 27.0(19)        | 0.1(14)         | -5.5(15)        | 4.0(14)         |
| O31  | 24.5(19)        | 19.9(16)        | 20.8(18)        | -11.3(14)       | -1.4(14)        | 4.1(14)         |
| O32  | 23.1(18)        | 12.8(14)        | 21.8(17)        | -1.5(13)        | 6.0(14)         | -2.7(13)        |
| O33  | 13.2(16)        | 17.3(15)        | 26.1(18)        | 1.1(14)         | -7.8(14)        | -0.5(12)        |
| O121 | 12.0(15)        | 26.3(16)        | 16.9(16)        | -4.1(13)        | -1.8(13)        | 4.7(13)         |
| O231 | 12.1(14)        | 13.5(13)        | 14.3(15)        | -2.9(12)        | 2.0(12)         | 4.0(12)         |

**Table S24:** Bond Lengths for  $[\text{Te}_4][\text{HS}_3\text{O}_{10}]_2$  in pm.

| Atom | Atom             | Length/pm | Atom | Atom | Length/pm |
|------|------------------|-----------|------|------|-----------|
| Te1  | Te2              | 266.68(4) | S2   | O22  | 141.0(3)  |
| Te1  | Te2 <sup>1</sup> | 266.99(4) | S2   | O121 | 161.7(3)  |
| S1   | O11              | 141.7(4)  | S2   | O231 | 156.7(3)  |
| S1   | O12              | 141.4(3)  | S3   | O31  | 142.5(3)  |
| S1   | O13              | 152.1(3)  | S3   | O32  | 143.6(4)  |
| S1   | O121             | 163.7(3)  | S3   | O33  | 142.8(3)  |
| S2   | O21              | 140.6(4)  | S3   | O231 | 170.9(3)  |

<sup>1</sup>-X, 1-Y, -Z

**Table S25:** Bond Angles for [Te<sub>4</sub>][HS<sub>3</sub>O<sub>10</sub>]<sub>2</sub>.

| Atom | Atom | Atom             | Angle/°    | Atom | Atom | Atom | Angle/°    |
|------|------|------------------|------------|------|------|------|------------|
| Te2  | Te1  | Te2 <sup>1</sup> | 90.546(12) | O22  | S2   | O121 | 109.28(19) |
| Te1  | Te2  | Te1 <sup>1</sup> | 89.454(12) | O22  | S2   | O231 | 106.3(2)   |
| O11  | S1   | O13              | 111.2(2)   | O231 | S2   | O121 | 101.39(18) |
| O11  | S1   | O121             | 108.94(19) | O31  | S3   | O32  | 116.9(2)   |
| O12  | S1   | O11              | 121.1(2)   | O31  | S3   | O33  | 115.9(2)   |
| O12  | S1   | O13              | 109.7(2)   | O31  | S3   | O231 | 103.71(18) |
| O12  | S1   | O121             | 102.07(19) | O32  | S3   | O231 | 97.90(18)  |
| O13  | S1   | O121             | 101.72(19) | O33  | S3   | O32  | 114.8(2)   |
| O21  | S2   | O22              | 122.2(2)   | O33  | S3   | O231 | 104.01(17) |
| O21  | S2   | O121             | 104.1(2)   | S2   | O121 | S1   | 123.0(2)   |
| O21  | S2   | O231             | 111.54(19) | S2   | O231 | S3   | 123.0(2)   |

<sup>1</sup>-X, 1-Y, -Z**Table S26:** Torsion Angles for [Te<sub>4</sub>][HS<sub>3</sub>O<sub>10</sub>]<sub>2</sub>.

| A   | B  | C    | D  | Angle/°  | A    | B  | C    | D  | Angle/°  |
|-----|----|------|----|----------|------|----|------|----|----------|
| O11 | S1 | O121 | S2 | 36.7(3)  | O22  | S2 | O231 | S3 | 169.7(2) |
| O12 | S1 | O121 | S2 | 165.8(3) | O31  | S3 | O231 | S2 | 57.0(3)  |
| O13 | S1 | O121 | S2 | -80.9(3) | O32  | S3 | O231 | S2 | 177.3(2) |
| O21 | S2 | O121 | S1 | 161.5(3) | O33  | S3 | O231 | S2 | -64.6(3) |
| O21 | S2 | O231 | S3 | 34.2(3)  | O121 | S2 | O231 | S3 | -76.1(2) |
| O22 | S2 | O121 | S1 | 29.4(3)  | O231 | S2 | O121 | S1 | -82.6(3) |

**Table S27:** Hydrogen Atom Coordinates (Å×10<sup>4</sup>) and Isotropic Displacement Parameters (Å<sup>2</sup>×10<sup>3</sup>) for [Te<sub>4</sub>][HS<sub>3</sub>O<sub>10</sub>]<sub>2</sub>.

| Atom | x       | y       | z       | U(eq) |
|------|---------|---------|---------|-------|
| H13  | 7600.73 | 3776.55 | 6001.36 | 30    |

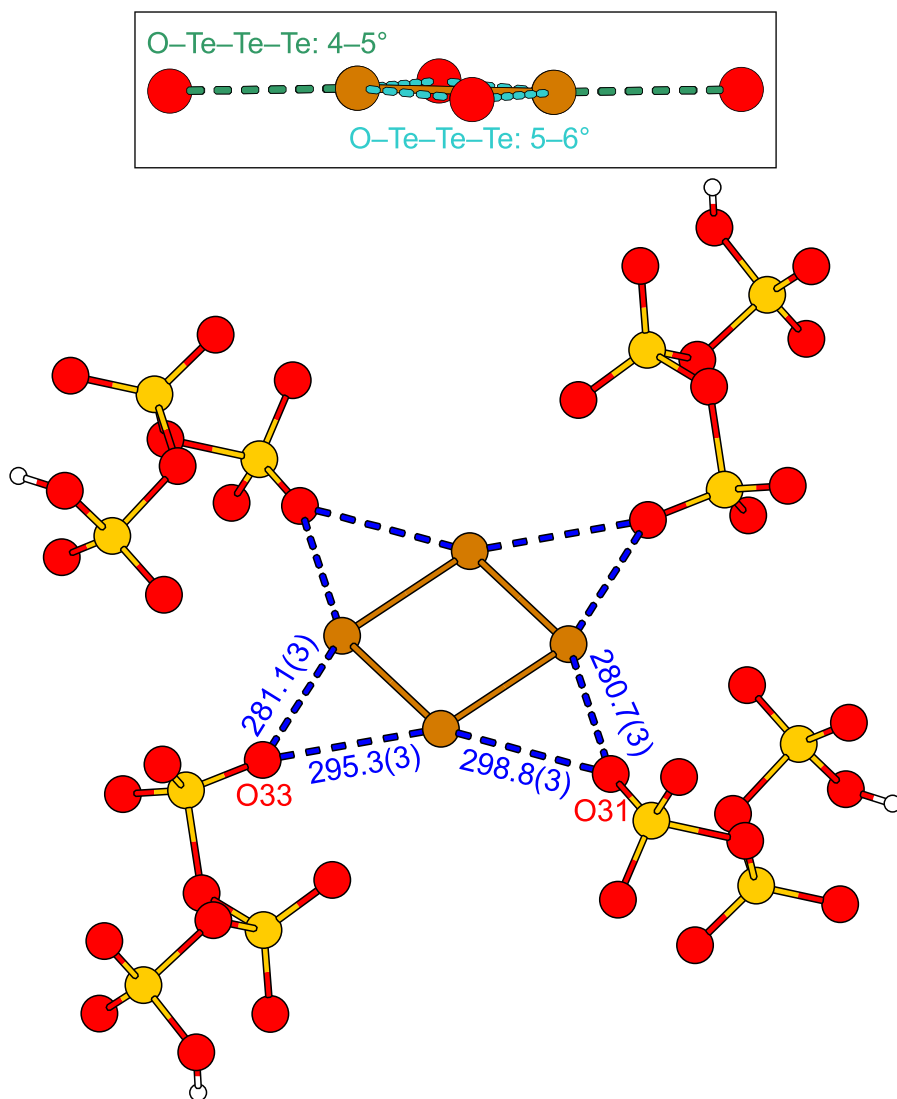

**Figure S 14:** Chalcogen-bonding (D-A distance below 300 pm) within  $[\text{Te}_4][\text{HS}_3\text{O}_{10}]_2$ . Distances are given in pm. O-Te coordination within the  $[\text{Te}_4]$  plane and O-Te-Te-Te torsion angles are shown above.

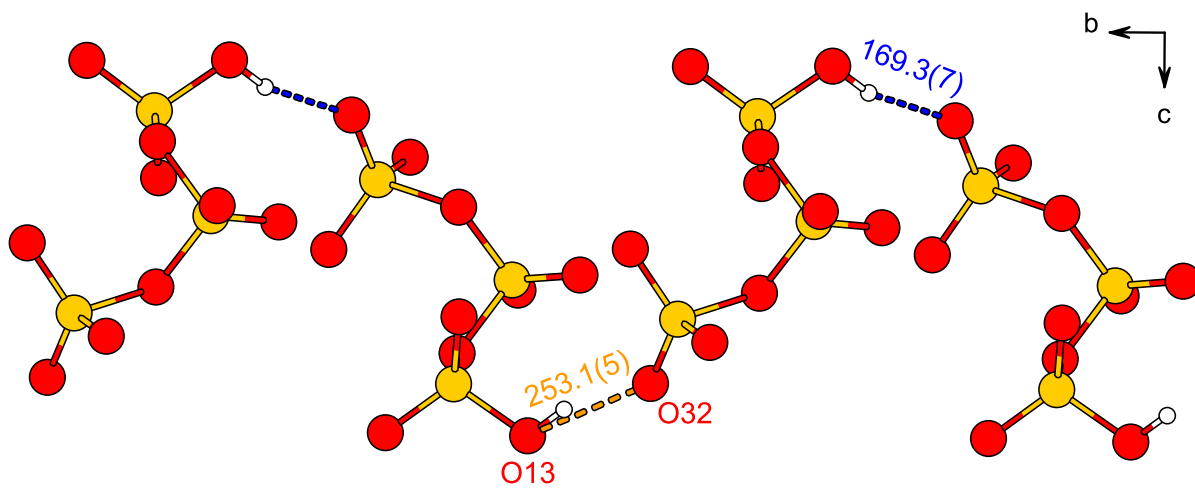

**Figure S 15:** Hydrogen-bonding within  $[\text{Te}_4][\text{HS}_3\text{O}_{10}]_2$ . Distances are given in pm.

**[Te<sub>6</sub>][HS<sub>3</sub>O<sub>10</sub>]<sub>4</sub>-I (5)****Table S28:** Crystallographic data of [Te<sub>6</sub>][HS<sub>3</sub>O<sub>10</sub>]<sub>4</sub>-I.

|                                                              |                                                                                                 |
|--------------------------------------------------------------|-------------------------------------------------------------------------------------------------|
| Empirical formula                                            | H <sub>4</sub> O <sub>40</sub> S <sub>12</sub> Te <sub>6</sub>                                  |
| Formula weight                                               | 1794.35 g/mol                                                                                   |
| Temperature                                                  | 100.00 K                                                                                        |
| Crystal system                                               | Triclinic                                                                                       |
| Space group                                                  | <i>P</i> $\bar{1}$ (No. 2)                                                                      |
| Unit cell dimensions                                         | <i>a</i> = 910.19(7) pm                                                                         |
|                                                              | <i>b</i> = 1153.01(9) pm                                                                        |
|                                                              | <i>c</i> = 1790.30(14) pm                                                                       |
|                                                              | $\alpha$ = 99.888(3) $^\circ$<br>$\beta$ = 94.994(3) $^\circ$<br>$\gamma$ = 100.908(3) $^\circ$ |
| Volume                                                       | 1803.6(2) Å <sup>3</sup>                                                                        |
| <i>Z</i>                                                     | 2                                                                                               |
| $\rho_{\text{calc}}$                                         | 3.304 g/cm <sup>3</sup>                                                                         |
| $\mu$                                                        | 5.616 mm <sup>-1</sup>                                                                          |
| F(000)                                                       | 1656                                                                                            |
| Crystal size                                                 | 0.15 × 0.08 × 0.03 mm <sup>3</sup>                                                              |
| Radiation                                                    | MoK $\alpha$ ( $\lambda$ = 0.71073 nm)                                                          |
| 2 $\Theta$ range for data collection                         | 4.592 to 63.012                                                                                 |
| Index ranges                                                 | -13 ≤ <i>h</i> ≤ 13, -16 ≤ <i>k</i> ≤ 16, -26 ≤ <i>l</i> ≤ 25                                   |
| Reflections collected                                        | 64075                                                                                           |
| Independent reflections                                      | 11881 [ <i>R</i> <sub>int</sub> = 0.0504, <i>R</i> <sub><math>\sigma</math></sub> = 0.0419]     |
| Completeness                                                 | 99.7%                                                                                           |
| Absorption correction                                        | Multiscan                                                                                       |
| Min. and max. transmission                                   | 0.572 / 0.747                                                                                   |
| Data/restraints/parameters                                   | 11881/1/534                                                                                     |
| Goodness-of-fit on F <sup>2</sup>                            | 1.174                                                                                           |
| Final <i>R</i> indexes [ <i>I</i> ≥ 2 $\sigma$ ( <i>I</i> )] | <i>R</i> <sub>1</sub> = 0.0573, <i>wR</i> <sub>2</sub> = 0.1205                                 |
| Final <i>R</i> indexes [all data]                            | <i>R</i> <sub>1</sub> = 0.0700, <i>wR</i> <sub>2</sub> = 0.1251                                 |
| Largest diff. peak/hole                                      | 2.28/-2.34 e · Å <sup>-3</sup>                                                                  |

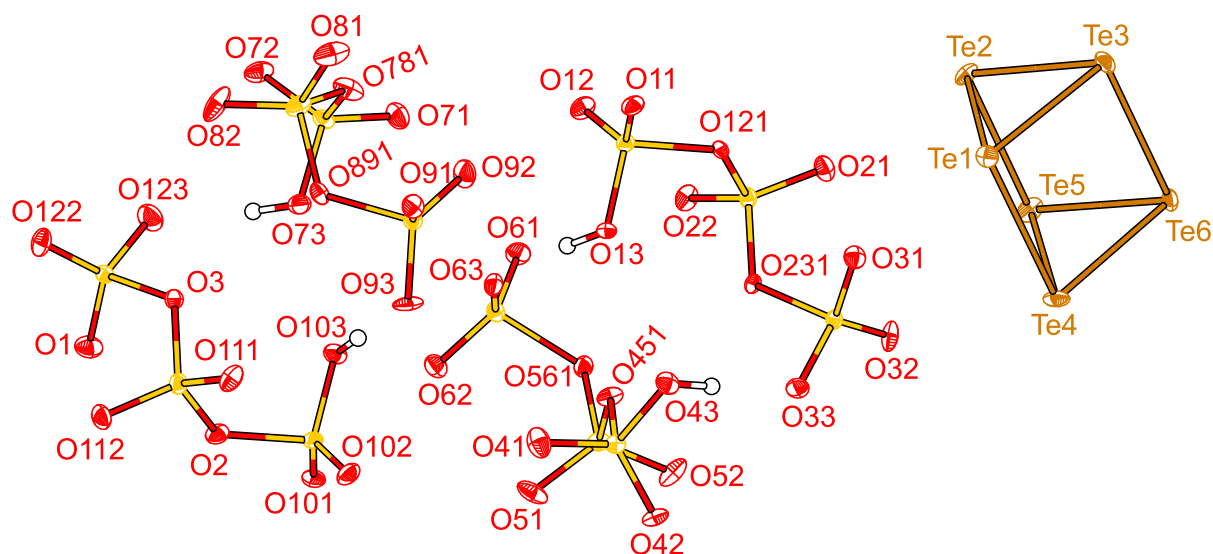

**Figure S16:** Thermal ellipsoid plot of the asymmetric unit of  $[\text{Te}_6][\text{HS}_3\text{O}_{10}]_4\text{-I}$  shown with 50% probability.

**Table S29:** Fractional Atomic Coordinates ( $\times 10^4$ ) and Equivalent Isotropic Displacement Parameters ( $\text{\AA}^2 \times 10^3$ ) for  $[\text{Te}_6][\text{HS}_3\text{O}_{10}]_4\text{-I}$ .  $U_{\text{eq}}$  is defined as 1/3 of the trace of the orthogonalised  $U_{ij}$  tensor.

| Atom | <i>x</i>   | <i>y</i>   | <i>z</i>   | $U_{\text{eq}}$ |
|------|------------|------------|------------|-----------------|
| Te1  | 9141.3(6)  | 5912.5(5)  | 2934.0(3)  | 12.53(10)       |
| Te2  | 11245.2(6) | 7906.6(5)  | 3549.2(3)  | 13.51(10)       |
| Te3  | 11591.5(6) | 6543.2(5)  | 2214.6(3)  | 14.13(11)       |
| Te4  | 7449.7(6)  | 7600.5(5)  | 2036.6(3)  | 14.78(11)       |
| Te5  | 9628.8(6)  | 9506.8(5)  | 2714.3(3)  | 15.17(11)       |
| Te6  | 9967.6(6)  | 8204.5(5)  | 1367.9(3)  | 15.29(11)       |
| S1   | 8156(2)    | 6953.3(17) | 6320.7(10) | 9.6(3)          |
| S2   | 8222(2)    | 8434.2(17) | 5188.1(10) | 9.7(3)          |
| S3   | 5952(2)    | 7202.7(16) | 3937.0(10) | 9.0(3)          |
| O11  | 8463(6)    | 5800(5)    | 6263(3)    | 13.2(11)        |
| O12  | 8948(7)    | 7928(5)    | 6899(3)    | 15.0(11)        |
| O13  | 6472(6)    | 6920(6)    | 6227(3)    | 12.7(11)        |
| O21  | 9153(7)    | 8598(5)    | 4605(3)    | 15.6(11)        |
| O22  | 8286(7)    | 9377(5)    | 5827(3)    | 14.2(11)        |
| O31  | 6871(7)    | 6319(5)    | 3860(3)    | 13.7(11)        |
| O32  | 6213(7)    | 8096(5)    | 3467(3)    | 15.6(11)        |
| O33  | 4393(6)    | 6765(5)    | 4022(3)    | 15.1(11)        |

---

|      |         |            |             |          |
|------|---------|------------|-------------|----------|
| O121 | 8571(6) | 7285(5)    | 5478(3)     | 8.7(9)   |
| O231 | 6534(6) | 8027(5)    | 4850(3)     | 10.9(10) |
| S4   | 2429(2) | 6352.5(17) | 5453.2(11)  | 10.0(3)  |
| S5   | 3302(2) | 8908.8(17) | 5843.5(11)  | 11.1(3)  |
| S6   | 5455(2) | 9621.3(17) | 7227.1(11)  | 10.3(3)  |
| S7   | 7864(2) | 8676.0(17) | 9265.2(11)  | 11.7(3)  |
| S8   | 7104(2) | 6144.1(18) | 9303.2(12)  | 14.1(4)  |
| S9   | 5255(2) | 5386.1(17) | 7860.6(10)  | 9.7(3)   |
| O41  | 1968(7) | 5926(6)    | 6108(4)     | 19.8(13) |
| O42  | 1362(6) | 6596(5)    | 4899(3)     | 14.6(11) |
| O43  | 3495(7) | 5590(5)    | 5099(3)     | 14.5(11) |
| O51  | 2099(7) | 8937(6)    | 6293(4)     | 19.7(13) |
| O52  | 3179(8) | 9219(6)    | 5112(4)     | 20.0(13) |
| O61  | 6894(6) | 10410(5)   | 7271(3)     | 16.1(11) |
| O62  | 4361(7) | 10065(5)   | 7643(3)     | 15.4(11) |
| O63  | 5500(6) | 8374(5)    | 7215(3)     | 14.0(11) |
| O71  | 8427(7) | 9169(6)    | 8656(4)     | 20.1(13) |
| O72  | 8575(7) | 9069(6)    | 10025(4)    | 17.8(12) |
| O73  | 6173(6) | 8562(5)    | 9219(3)     | 14.1(11) |
| O81  | 7853(8) | 5190(6)    | 9074(4)     | 23.0(14) |
| O82  | 6900(9) | 6500(6)    | 10075(4)    | 23.2(14) |
| O91  | 5068(7) | 4110(5)    | 7788(3)     | 14.7(11) |
| O92  | 6545(7) | 5981(6)    | 7591(4)     | 20.0(13) |
| O93  | 3857(6) | 5772(5)    | 7691(4)     | 16.6(12) |
| O451 | 3706(6) | 7597(5)    | 5757(3)     | 11.6(10) |
| O561 | 4847(6) | 9610(5)    | 6270(3)     | 12.1(10) |
| O781 | 8021(7) | 7257(5)    | 9005(4)     | 18.8(12) |
| O891 | 5521(6) | 5902(5)    | 8829(3)     | 11.3(10) |
| S10  | 1636(2) | 7686.0(18) | 8310.3(11)  | 11.1(3)  |
| S11  | 1636(2) | 6459.4(17) | 9579.5(11)  | 11.5(3)  |
| S12  | 3876(2) | 8085.1(17) | 10716.6(11) | 10.9(3)  |
| O1   | 2722(7) | 8769(6)    | 10704(4)    | 18.5(12) |
| O2   | 1270(7) | 7523(5)    | 9175(3)     | 14.5(11) |

---

|      |         |         |          |          |
|------|---------|---------|----------|----------|
| O3   | 3319(6) | 6939(5) | 9913(3)  | 11.6(10) |
| O101 | 1351(7) | 8841(6) | 8295(3)  | 17.0(12) |
| O102 | 811(7)  | 6649(6) | 7796(3)  | 16.6(12) |
| O103 | 3317(6) | 7732(5) | 8373(3)  | 14.0(11) |
| O111 | 1601(7) | 5424(6) | 9024(3)  | 18.1(12) |
| O112 | 690(7)  | 6448(6) | 10170(3) | 16.1(11) |
| O122 | 3947(7) | 7430(6) | 11324(3) | 17.4(12) |
| O123 | 5300(7) | 8636(6) | 10527(4) | 21.9(13) |

**Table S30:** Anisotropic Displacement Parameters ( $\text{\AA}^2 \times 10^3$ ) for  $[\text{Te}_6][\text{HS}_3\text{O}_{10}]_4\text{-I}$ . The anisotropic displacement factor exponent takes the form:  $-2\pi^2[h^2a^2U_{11}+2hka*b*U_{12}+\dots]$ .

| Atom | U <sub>11</sub> | U <sub>22</sub> | U <sub>33</sub> | U <sub>23</sub> | U <sub>13</sub> | U <sub>12</sub> |
|------|-----------------|-----------------|-----------------|-----------------|-----------------|-----------------|
| Te1  | 12.5(2)         | 9.5(2)          | 15.9(2)         | 5.21(18)        | 2.75(18)        | 0.15(17)        |
| Te2  | 16.0(2)         | 12.5(2)         | 9.8(2)          | 0.46(17)        | -4.82(18)       | 1.96(18)        |
| Te3  | 14.2(2)         | 16.8(2)         | 15.3(2)         | 4.64(19)        | 7.12(18)        | 9.00(19)        |
| Te4  | 6.4(2)          | 17.0(2)         | 21.0(3)         | 7.9(2)          | -1.16(18)       | 0.00(18)        |
| Te5  | 21.4(3)         | 7.6(2)          | 14.9(2)         | -1.13(18)       | -3.05(19)       | 4.37(19)        |
| Te6  | 17.3(2)         | 23.4(3)         | 10.3(2)         | 8.07(19)        | 7.06(18)        | 10.2(2)         |
| S1   | 10.0(7)         | 9.9(8)          | 8.6(8)          | 0.3(6)          | 0.0(6)          | 2.9(6)          |
| S2   | 11.1(8)         | 8.8(8)          | 8.0(7)          | -0.1(6)         | 1.4(6)          | 0.5(6)          |
| S3   | 11.2(8)         | 7.8(8)          | 7.8(7)          | 0.7(6)          | 1.4(6)          | 1.9(6)          |
| O11  | 15(3)           | 13(3)           | 13(3)           | 3(2)            | -1(2)           | 7(2)            |
| O12  | 16(3)           | 12(3)           | 14(3)           | -1(2)           | -3(2)           | 1(2)            |
| O13  | 7(2)            | 20(3)           | 11(3)           | 2(2)            | 0.0(19)         | 3(2)            |
| O21  | 15(3)           | 16(3)           | 14(3)           | 0(2)            | 5(2)            | -1(2)           |
| O22  | 20(3)           | 7(2)            | 12(3)           | -4(2)           | -1(2)           | 1(2)            |
| O31  | 16(3)           | 12(3)           | 14(3)           | 2(2)            | 3(2)            | 5(2)            |
| O32  | 30(3)           | 11(3)           | 8(2)            | 2(2)            | 5(2)            | 7(2)            |
| O33  | 9(2)            | 18(3)           | 14(3)           | -1(2)           | -1(2)           | -1(2)           |
| O121 | 9(2)            | 8(2)            | 9(2)            | 0.8(19)         | 2.8(18)         | 3.2(18)         |
| O231 | 11(2)           | 13(3)           | 6(2)            | -3.1(19)        | -0.9(19)        | 2(2)            |
| S4   | 9.9(7)          | 8.3(8)          | 11.5(8)         | 1.5(6)          | 0.7(6)          | 1.9(6)          |
| S5   | 10.6(8)         | 8.5(8)          | 13.1(8)         | 0.0(6)          | -0.9(6)         | 2.4(6)          |

|      |         |         |         |          |         |         |
|------|---------|---------|---------|----------|---------|---------|
| S6   | 10.1(7) | 9.8(8)  | 10.0(8) | 0.2(6)   | 2.3(6)  | 0.6(6)  |
| S7   | 7.7(7)  | 11.2(8) | 14.5(8) | 0.8(7)   | 1.9(6)  | -0.6(6) |
| S8   | 15.4(9) | 10.2(8) | 14.1(9) | -1.9(7)  | -4.4(7) | 2.6(7)  |
| S9   | 8.6(7)  | 9.8(8)  | 10.0(8) | 0.8(6)   | 0.7(6)  | 1.9(6)  |
| O41  | 26(3)   | 16(3)   | 21(3)   | 7(2)     | 10(3)   | 6(2)    |
| O42  | 11(2)   | 16(3)   | 16(3)   | 4(2)     | -5(2)   | 2(2)    |
| O43  | 15(3)   | 12(3)   | 16(3)   | 0(2)     | 3(2)    | 5(2)    |
| O51  | 11(3)   | 15(3)   | 29(3)   | -8(2)    | 5(2)    | 3(2)    |
| O52  | 27(3)   | 17(3)   | 14(3)   | 4(2)     | -8(2)   | 2(2)    |
| O61  | 11(3)   | 16(3)   | 18(3)   | 3(2)     | 0(2)    | -3(2)   |
| O62  | 14(3)   | 16(3)   | 16(3)   | 0(2)     | 4(2)    | 3(2)    |
| O63  | 14(3)   | 18(3)   | 10(2)   | 4(2)     | 2(2)    | 2(2)    |
| O71  | 17(3)   | 24(3)   | 19(3)   | 6(3)     | 7(2)    | 2(2)    |
| O72  | 14(3)   | 15(3)   | 20(3)   | -3(2)    | -6(2)   | 1(2)    |
| O73  | 12(2)   | 16(3)   | 15(3)   | 3(2)     | 0(2)    | 4(2)    |
| O81  | 23(3)   | 13(3)   | 28(3)   | -6(2)    | -10(3)  | 7(2)    |
| O82  | 44(4)   | 11(3)   | 11(3)   | -2(2)    | -8(3)   | 7(3)    |
| O91  | 15(3)   | 13(3)   | 13(3)   | -3(2)    | 1(2)    | 1(2)    |
| O92  | 17(3)   | 24(3)   | 16(3)   | 5(2)     | 4(2)    | -5(2)   |
| O93  | 11(3)   | 15(3)   | 22(3)   | -3(2)    | -7(2)   | 8(2)    |
| O451 | 12(2)   | 5(2)    | 16(3)   | -0.2(19) | -4(2)   | 0.6(19) |
| O561 | 13(2)   | 13(3)   | 10(2)   | 1(2)     | 1(2)    | 2(2)    |
| O781 | 12(3)   | 14(3)   | 28(3)   | -3(2)    | 3(2)    | 2(2)    |
| O891 | 12(2)   | 9(2)    | 13(3)   | 1(2)     | 5(2)    | 1.0(19) |
| S10  | 9.8(8)  | 13.3(8) | 11.0(8) | 2.0(6)   | 0.0(6)  | 5.4(6)  |
| S11  | 12.4(8) | 12.0(8) | 9.2(8)  | 0.6(6)   | 1.5(6)  | 1.8(6)  |
| S12  | 8.4(7)  | 13.3(8) | 10.7(8) | 2.3(6)   | 2.0(6)  | 1.2(6)  |
| O1   | 17(3)   | 17(3)   | 23(3)   | 3(2)     | 2(2)    | 9(2)    |
| O2   | 16(3)   | 14(3)   | 14(3)   | 1(2)     | -1(2)   | 8(2)    |
| O3   | 12(2)   | 13(3)   | 9(2)    | -2(2)    | 1.0(19) | 4(2)    |
| O101 | 14(3)   | 24(3)   | 16(3)   | 3(2)     | 2(2)    | 13(2)   |
| O102 | 17(3)   | 20(3)   | 11(3)   | -1(2)    | -4(2)   | 5(2)    |
| O103 | 11(2)   | 14(3)   | 15(3)   | -3(2)    | 1(2)    | 3(2)    |

|      |       |       |       |      |       |       |
|------|-------|-------|-------|------|-------|-------|
| O111 | 22(3) | 17(3) | 12(3) | 1(2) | -3(2) | 2(2)  |
| O112 | 15(3) | 19(3) | 14(3) | 5(2) | 6(2)  | 1(2)  |
| O122 | 23(3) | 17(3) | 12(3) | 7(2) | 3(2)  | 1(2)  |
| O123 | 15(3) | 26(3) | 21(3) | 1(3) | 5(2)  | -2(2) |

**Table S31:** Bond Lengths for [Te<sub>6</sub>][HS<sub>3</sub>O<sub>10</sub>]<sub>4</sub>-I in pm.

| Atom | Atom | Length/pm | Atom | Atom | Length/pm |
|------|------|-----------|------|------|-----------|
| Te1  | Te2  | 269.50(8) | S6   | O61  | 143.3(6)  |
| Te1  | Te3  | 271.46(7) | S6   | O62  | 141.4(6)  |
| Te1  | Te4  | 324.30(8) | S6   | O63  | 144.3(6)  |
| Te2  | Te3  | 270.34(8) | S6   | O561 | 175.1(6)  |
| Te2  | Te5  | 306.51(8) | S7   | O71  | 140.6(6)  |
| Te3  | Te6  | 313.53(8) | S7   | O72  | 141.4(6)  |
| Te4  | Te5  | 269.30(8) | S7   | O73  | 151.3(6)  |
| Te4  | Te6  | 270.75(8) | S7   | O781 | 165.9(6)  |
| Te5  | Te6  | 268.72(8) | S8   | O81  | 142.2(6)  |
| S1   | O11  | 139.8(6)  | S8   | O82  | 141.0(7)  |
| S1   | O12  | 142.1(6)  | S8   | O781 | 159.2(7)  |
| S1   | O13  | 152.0(6)  | S8   | O891 | 155.8(6)  |
| S1   | O121 | 167.5(6)  | S9   | O91  | 143.1(6)  |
| S2   | O21  | 141.6(6)  | S9   | O92  | 141.0(6)  |
| S2   | O22  | 142.5(6)  | S9   | O93  | 145.1(6)  |
| S2   | O121 | 157.9(6)  | S9   | O891 | 171.4(6)  |
| S2   | O231 | 155.4(6)  | S10  | O2   | 164.6(6)  |
| S3   | O31  | 143.2(6)  | S10  | O101 | 140.8(6)  |
| S3   | O32  | 143.7(6)  | S10  | O102 | 141.5(6)  |
| S3   | O33  | 144.3(6)  | S10  | O103 | 151.5(6)  |
| S3   | O231 | 172.6(6)  | S11  | O2   | 159.8(6)  |
| S4   | O41  | 141.4(6)  | S11  | O3   | 155.4(6)  |
| S4   | O42  | 142.7(6)  | S11  | O111 | 141.0(6)  |
| S4   | O43  | 153.4(6)  | S11  | O112 | 142.0(6)  |
| S4   | O451 | 164.2(6)  | S12  | O1   | 142.8(6)  |
| S5   | O51  | 141.6(6)  | S12  | O3   | 174.4(6)  |

|    |      |          |     |      |          |
|----|------|----------|-----|------|----------|
| S5 | O52  | 141.7(6) | S12 | O122 | 143.0(6) |
| S5 | O451 | 160.8(6) | S12 | O123 | 142.8(7) |

**Table S32:** Bond Angles for [Te<sub>6</sub>][HS<sub>3</sub>O<sub>10</sub>]<sub>4</sub>-I.

| Atom | Atom | Atom | Angle/°  | Atom | Atom | Atom | Angle/°  |
|------|------|------|----------|------|------|------|----------|
| Te2  | Te1  | Te3  | 59.96(2) | O561 | S5   | O451 | 96.1(3)  |
| Te2  | Te1  | Te4  | 87.36(2) | O61  | S6   | O63  | 115.2(4) |
| Te3  | Te1  | Te4  | 88.62(2) | O61  | S6   | O561 | 97.0(3)  |
| Te1  | Te2  | Te3  | 60.38(2) | O62  | S6   | O61  | 117.5(4) |
| Te1  | Te2  | Te5  | 92.65(2) | O62  | S6   | O63  | 115.8(4) |
| Te3  | Te2  | Te5  | 91.74(2) | O62  | S6   | O561 | 105.0(3) |
| Te1  | Te3  | Te6  | 91.25(2) | O63  | S6   | O561 | 102.2(3) |
| Te2  | Te3  | Te1  | 59.66(2) | O71  | S7   | O72  | 122.1(4) |
| Te2  | Te3  | Te6  | 87.98(2) | O71  | S7   | O73  | 110.7(4) |
| Te5  | Te4  | Te1  | 88.86(2) | O71  | S7   | O781 | 100.7(4) |
| Te5  | Te4  | Te6  | 59.68(2) | O72  | S7   | O73  | 111.9(4) |
| Te6  | Te4  | Te1  | 89.09(2) | O72  | S7   | O781 | 106.5(4) |
| Te4  | Te5  | Te2  | 91.13(2) | O73  | S7   | O781 | 102.3(3) |
| Te6  | Te5  | Te2  | 89.74(2) | O81  | S8   | O781 | 104.4(4) |
| Te6  | Te5  | Te4  | 60.43(2) | O81  | S8   | O891 | 110.4(3) |
| Te4  | Te6  | Te3  | 91.02(2) | O82  | S8   | O81  | 121.1(4) |
| Te5  | Te6  | Te3  | 90.53(2) | O82  | S8   | O781 | 109.8(4) |
| Te5  | Te6  | Te4  | 59.89(2) | O82  | S8   | O891 | 106.7(4) |
| O11  | S1   | O12  | 121.6(4) | O891 | S8   | O781 | 103.0(3) |
| O11  | S1   | O13  | 111.9(4) | O91  | S9   | O93  | 113.4(4) |
| O11  | S1   | O121 | 101.5(3) | O91  | S9   | O891 | 103.6(3) |
| O12  | S1   | O13  | 111.8(3) | O92  | S9   | O91  | 116.5(4) |
| O12  | S1   | O121 | 107.3(3) | O92  | S9   | O93  | 116.9(4) |
| O13  | S1   | O121 | 99.5(3)  | O92  | S9   | O891 | 105.1(3) |
| O21  | S2   | O22  | 120.9(4) | O93  | S9   | O891 | 98.1(3)  |
| O21  | S2   | O121 | 105.2(3) | S5   | O451 | S4   | 122.4(3) |
| O21  | S2   | O231 | 111.0(3) | S5   | O561 | S6   | 124.3(4) |
| O22  | S2   | O121 | 109.5(3) | S8   | O781 | S7   | 125.0(4) |

|      |      |      |          |      |      |      |          |
|------|------|------|----------|------|------|------|----------|
| O22  | S2   | O231 | 106.0(3) | S8   | O891 | S9   | 121.8(3) |
| O231 | S2   | O121 | 102.9(3) | O101 | S10  | O2   | 101.3(3) |
| O31  | S3   | O32  | 116.2(4) | O101 | S10  | O102 | 122.1(4) |
| O31  | S3   | O33  | 115.8(4) | O101 | S10  | O103 | 110.0(4) |
| O31  | S3   | O231 | 104.1(3) | O102 | S10  | O2   | 107.2(4) |
| O32  | S3   | O33  | 115.5(4) | O102 | S10  | O103 | 111.9(3) |
| O32  | S3   | O231 | 103.1(3) | O103 | S10  | O2   | 101.6(3) |
| O33  | S3   | O231 | 98.4(3)  | O3   | S11  | O2   | 102.3(3) |
| S2   | O121 | S1   | 123.3(3) | O111 | S11  | O2   | 110.0(3) |
| S2   | O231 | S3   | 122.7(3) | O111 | S11  | O3   | 106.0(3) |
| O41  | S4   | O42  | 121.0(4) | O111 | S11  | O112 | 122.0(4) |
| O41  | S4   | O43  | 108.7(4) | O112 | S11  | O2   | 103.8(3) |
| O41  | S4   | O451 | 106.9(4) | O112 | S11  | O3   | 111.1(3) |
| O42  | S4   | O43  | 113.2(4) | O1   | S12  | O3   | 104.1(3) |
| O42  | S4   | O451 | 107.3(3) | O1   | S12  | O122 | 116.1(4) |
| O43  | S4   | O451 | 96.7(3)  | O122 | S12  | O3   | 102.4(3) |
| O51  | S5   | O52  | 120.0(4) | O123 | S12  | O1   | 116.2(4) |
| O51  | S5   | O451 | 108.5(4) | O123 | S12  | O3   | 99.2(3)  |
| O51  | S5   | O561 | 113.8(3) | O123 | S12  | O122 | 115.2(4) |
| O52  | S5   | O451 | 108.6(4) | S11  | O2   | S10  | 124.8(4) |
| O52  | S5   | O561 | 107.2(4) | S11  | O3   | S12  | 122.1(3) |

**Table S33:** Torsion Angles for [Te<sub>6</sub>][HS<sub>3</sub>O<sub>10</sub>]<sub>4</sub>-I.

| A   | B  | C    | D  | Angle/°  | A    | B  | C    | D  | Angle/°   |
|-----|----|------|----|----------|------|----|------|----|-----------|
| O11 | S1 | O121 | S2 | 171.6(4) | O73  | S7 | O781 | S8 | -44.9(6)  |
| O12 | S1 | O121 | S2 | -59.8(5) | O81  | S8 | O781 | S7 | -166.7(5) |
| O13 | S1 | O121 | S2 | 56.8(5)  | O81  | S8 | O891 | S9 | -43.9(5)  |
| O21 | S2 | O121 | S1 | 161.5(4) | O82  | S8 | O781 | S7 | -35.5(6)  |
| O21 | S2 | O231 | S3 | 29.2(5)  | O82  | S8 | O891 | S9 | -177.2(4) |
| O22 | S2 | O121 | S1 | 30.1(5)  | O91  | S9 | O891 | S8 | 84.7(5)   |
| O22 | S2 | O231 | S3 | 162.2(4) | O92  | S9 | O891 | S8 | -37.9(5)  |
| O31 | S3 | O231 | S2 | 42.9(5)  | O93  | S9 | O891 | S8 | -158.7(4) |
| O32 | S3 | O231 | S2 | -78.9(5) | O451 | S5 | O561 | S6 | -73.9(4)  |

|      |    |      |    |           |      |     |      |     |           |
|------|----|------|----|-----------|------|-----|------|-----|-----------|
| O33  | S3 | O231 | S2 | 162.3(4)  | O561 | S5  | O451 | S4  | 170.4(4)  |
| O121 | S2 | O231 | S3 | -82.9(4)  | O781 | S8  | O891 | S9  | 67.1(4)   |
| O231 | S2 | O121 | S1 | -82.3(4)  | O891 | S8  | O781 | S7  | 77.9(5)   |
| O41  | S4 | O451 | S5 | -96.8(5)  | O1   | S12 | O3   | S11 | -27.7(5)  |
| O42  | S4 | O451 | S5 | 34.5(5)   | O2   | S11 | O3   | S12 | 74.2(4)   |
| O43  | S4 | O451 | S5 | 151.3(4)  | O3   | S11 | O2   | S10 | 83.7(5)   |
| O51  | S5 | O451 | S4 | 52.8(5)   | O101 | S10 | O2   | S11 | -170.0(5) |
| O51  | S5 | O561 | S6 | 39.4(6)   | O102 | S10 | O2   | S11 | 60.9(5)   |
| O52  | S5 | O451 | S4 | -79.2(5)  | O103 | S10 | O2   | S11 | -56.6(5)  |
| O52  | S5 | O561 | S6 | 174.5(4)  | O111 | S11 | O2   | S10 | -28.6(6)  |
| O61  | S6 | O561 | S5 | -179.3(4) | O111 | S11 | O3   | S12 | -170.5(4) |
| O62  | S6 | O561 | S5 | -58.3(5)  | O112 | S11 | O2   | S10 | -160.6(4) |
| O63  | S6 | O561 | S5 | 62.9(5)   | O112 | S11 | O3   | S12 | -36.0(5)  |
| O71  | S7 | O781 | S8 | -159.0(5) | O122 | S12 | O3   | S11 | 93.6(5)   |
| O72  | S7 | O781 | S8 | 72.7(6)   | O123 | S12 | O3   | S11 | -147.9(5) |

**Table S34:** Hydrogen Atom Coordinates ( $\text{\AA}\times 10^4$ ) and Isotropic Displacement Parameters ( $\text{\AA}^2\times 10^3$ ) for  $[\text{Te}_6][\text{HS}_3\text{O}_{10}]_4\text{-I}$ .

| Atom | x         | y         | z        | U(eq)  |
|------|-----------|-----------|----------|--------|
| H43  | 3740(140) | 5890(100) | 4720(50) | 30(30) |
| H73  | 5950.39   | 8872.98   | 9642.15  | 30(30) |
| H103 | 3474.87   | 7068.7    | 8156.63  | 20(30) |
| H13  | 6210(140) | 7430(120) | 6580(70) | 33     |

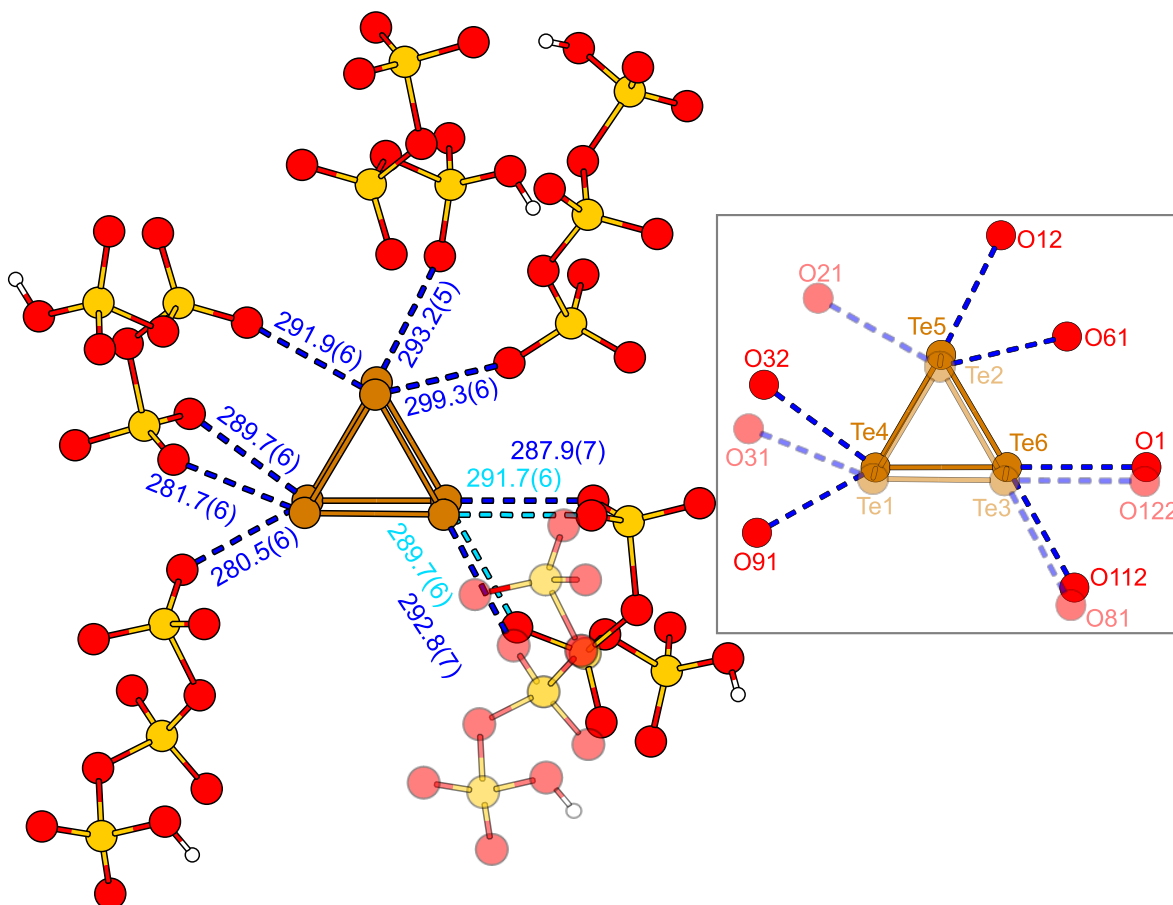

**Figure S 17:** Chalcogen-bonding (D–A distance below 300 pm) within  $[\text{Te}_6][\text{HS}_3\text{O}_{10}]_4\text{-I}$ . Distances are given in pm. O–Te coordination within the two  $[\text{Te}_3]$  planes is shown in the right corner. In case of overlapping atoms, the atoms in the upper plane are shown at 50% visibility.

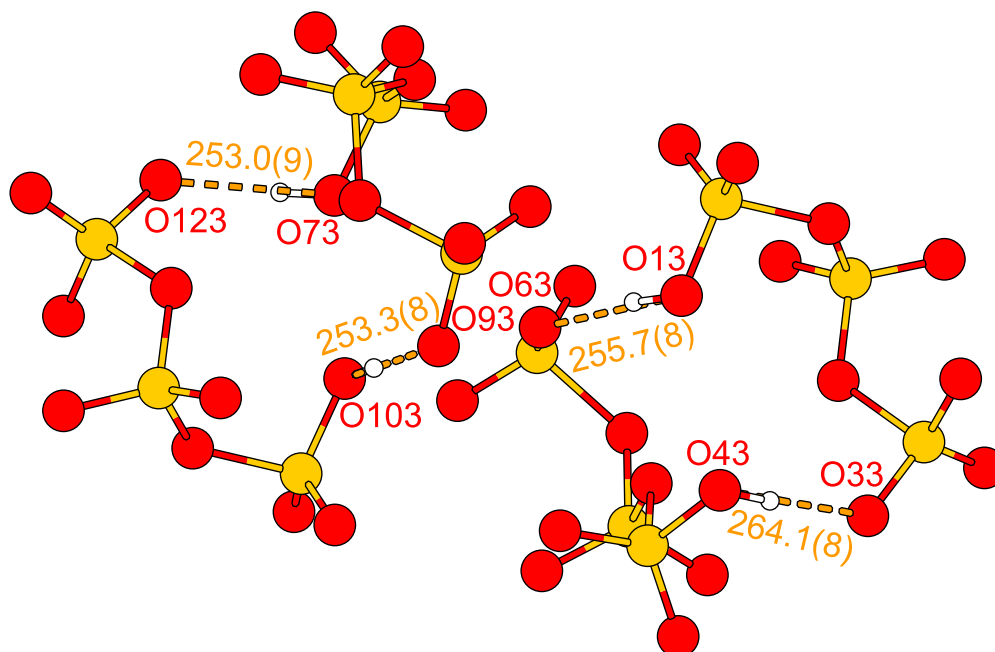

**Figure S 18:** Hydrogen-bonding Donor-Acceptor (O...O) distances within  $[\text{Te}_6][\text{HS}_3\text{O}_{10}]_4\text{-I}$ . Distances are given in pm.

**[Te<sub>6</sub>][HS<sub>3</sub>O<sub>10</sub>]<sub>4</sub>-II (6)****Table S35:** Crystallographic data of [Te<sub>6</sub>][HS<sub>3</sub>O<sub>10</sub>]<sub>4</sub>-II.

|                                                     |                                                                                                  |
|-----------------------------------------------------|--------------------------------------------------------------------------------------------------|
| Empirical formula                                   | H <sub>4</sub> O <sub>40</sub> S <sub>12</sub> Te <sub>6</sub>                                   |
| Formula weight                                      | 3587.70 g/mol                                                                                    |
| Temperature                                         | 100.00 K                                                                                         |
| Crystal system                                      | Triclinic                                                                                        |
| Space group                                         | <i>P</i> $\bar{1}$ (No. 2)                                                                       |
| Unit cell dimensions                                | <i>a</i> = 1342.99(7) pm                                                                         |
|                                                     | <i>b</i> = 1516.05(7) pm                                                                         |
|                                                     | <i>c</i> = 1993.31(10) pm                                                                        |
|                                                     | $\alpha$ = 99.470(2) $^\circ$<br>$\beta$ = 105.770(2) $^\circ$<br>$\gamma$ = 105.953(2) $^\circ$ |
| Volume                                              | 3627.6(3) Å <sup>3</sup>                                                                         |
| <i>Z</i>                                            | 4                                                                                                |
| $\rho_{\text{calc}}$                                | 3.285 g/cm <sup>3</sup>                                                                          |
| $\mu$                                               | 5.585 mm <sup>-1</sup>                                                                           |
| F(000)                                              | 3310                                                                                             |
| Crystal size                                        | 0.06 × 0.04 × 0.01 mm <sup>3</sup>                                                               |
| Radiation                                           | MoK $\alpha$ ( $\lambda$ = 0.71073 nm)                                                           |
| 2 $\Theta$ range for data collection                | 4.032 to 61.014                                                                                  |
| Index ranges                                        | -19 ≤ <i>h</i> ≤ 19, -21 ≤ <i>k</i> ≤ 21, -28 ≤ <i>l</i> ≤ 28                                    |
| Reflections collected                               | 289588                                                                                           |
| Independent reflections                             | 22166 [ <i>R</i> <sub>int</sub> = 0.0577, <i>R</i> <sub>σ</sub> = 0.0265]                        |
| Completeness                                        | 100%                                                                                             |
| Absorption correction                               | Multiscan                                                                                        |
| Min. and max. transmission                          | 0.655 / 0.747                                                                                    |
| Data/restraints/parameters                          | 22166/3/1080                                                                                     |
| Goodness-of-fit on F <sup>2</sup>                   | 1.074                                                                                            |
| Final <i>R</i> indexes [ <i>I</i> ≥ 2σ( <i>I</i> )] | <i>R</i> <sub>1</sub> = 0.0379, <i>wR</i> <sub>2</sub> = 0.0921                                  |
| Final <i>R</i> indexes [all data]                   | <i>R</i> <sub>1</sub> = 0.0471, <i>wR</i> <sub>2</sub> = 0.0962                                  |
| Largest diff. peak/hole                             | 3.68/−0.95 e · Å <sup>-3</sup>                                                                   |

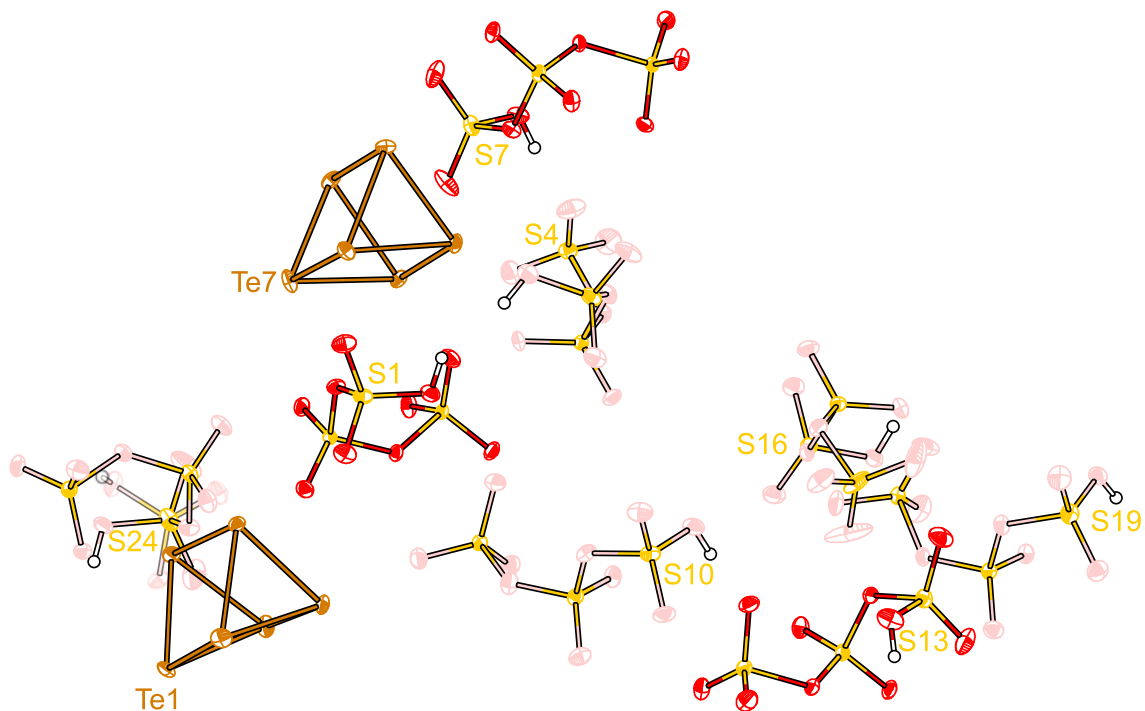

**Figure S19:** Thermal ellipsoid plot of the asymmetric unit of [Te<sub>6</sub>][HS<sub>3</sub>O<sub>10</sub>]<sub>4</sub>-II shown with 50% probability. For an improved contrast, half of the anions are colored differently. The disordered minor fraction (0.33) of the terminal SO<sub>3</sub>H unit (S24) is shown at 50% visibility.

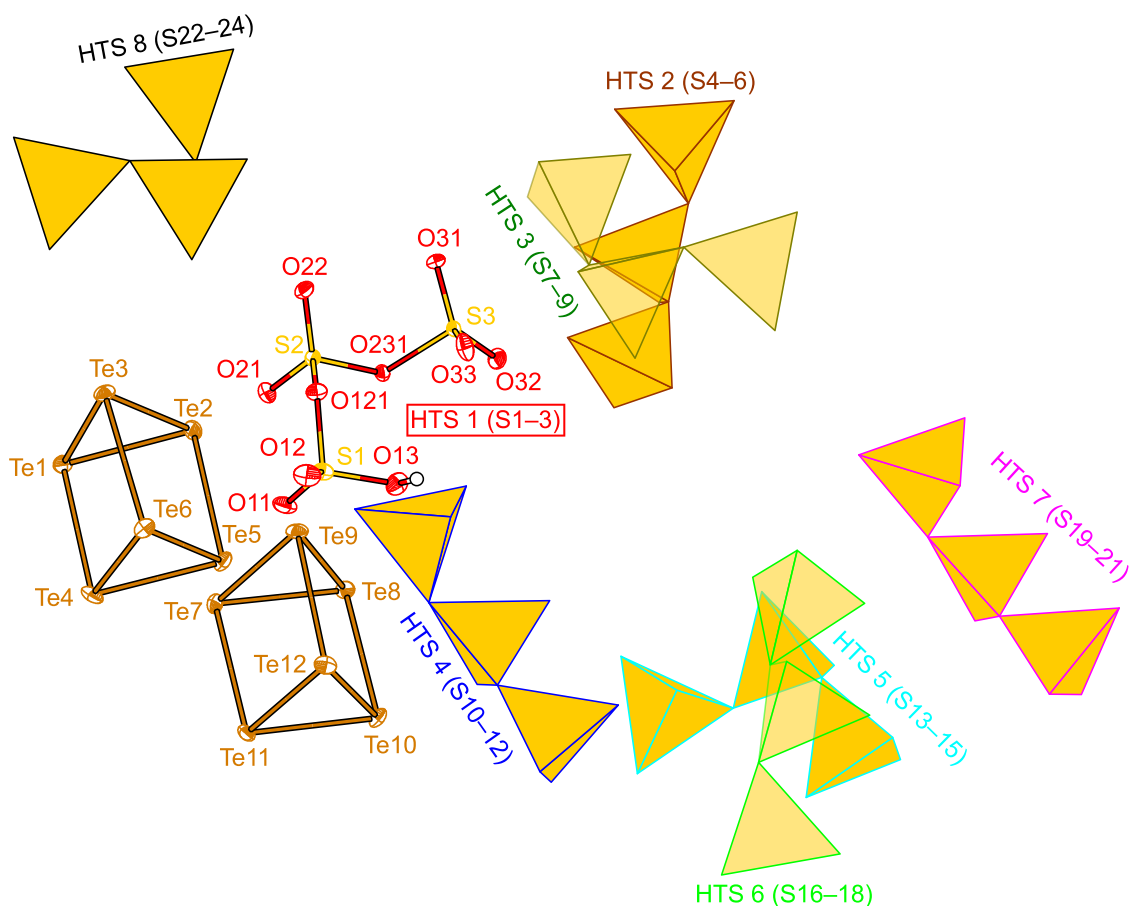

**Figure S 20:** Asymmetric unit of  $[\text{Te}_6][\text{HS}_3\text{O}_{10}]_4\text{-II}$ . For differentiation, the hydrogentrisulfate (HTS) anions are shown as polyhedral, except for HTS1 which is shown as thermal ellipsoid plot (50% probability). In case of overlying anion, the anion in the upper plane is shown at 50% visibility.

**Table S36:** Fractional Atomic Coordinates ( $\times 10^4$ ) and Equivalent Isotropic Displacement Parameters ( $\text{\AA}^2 \times 10^3$ ) for  $[\text{Te}_6][\text{HS}_3\text{O}_{10}]_4\text{-II}$ .  $U_{\text{eq}}$  is defined as 1/3 of the trace of the orthogonalised  $U_{\text{ij}}$  tensor.

| Atom | <i>x</i>  | <i>y</i>  | <i>z</i>  | $U_{\text{eq}}$ |
|------|-----------|-----------|-----------|-----------------|
| Te1  | 3559.6(3) | 1748.3(2) | -27.8(2)  | 14.92(6)        |
| Te2  | 4921.1(3) | 2181.8(3) | 1354.5(2) | 16.34(7)        |
| Te3  | 4727.5(3) | 3562.9(2) | 681.9(2)  | 15.43(7)        |
| Te4  | 1655.1(3) | 1889.3(2) | 540.1(2)  | 18.08(7)        |
| Te5  | 3030.6(3) | 2169.5(2) | 1895.9(2) | 14.04(6)        |
| Te6  | 2826.1(3) | 3655.8(2) | 1354.3(2) | 13.85(6)        |
| Te7  | 1633.6(3) | 7063.9(3) | 2974.5(2) | 17.92(7)        |
| Te8  | 2763.6(3) | 6827.2(2) | 4244.6(2) | 13.50(6)        |
| Te9  | 3134.6(3) | 8573.5(2) | 4032.5(2) | 15.58(7)        |
| Te10 | 920.1(3)  | 7027.5(2) | 4853.7(2) | 15.28(7)        |
| Te11 | -229.6(2) | 7186.5(2) | 3556.4(2) | 13.88(6)        |
| Te12 | 1171.4(3) | 8742.0(2) | 4599.4(2) | 14.82(6)        |

---

|      |             |           |            |           |
|------|-------------|-----------|------------|-----------|
| S1   | 4705.5(10)  | 5325.9(8) | 3472.7(7)  | 14.0(2)   |
| S2   | 6502.7(9)   | 4957.0(8) | 3082.8(6)  | 10.55(19) |
| S3   | 7897.4(9)   | 5087.2(8) | 4518.5(6)  | 10.31(19) |
| O11  | 4032(3)     | 4457(3)   | 2944(2)    | 19.4(7)   |
| O12  | 4423(3)     | 6159(3)   | 3500(2)    | 21.7(8)   |
| O13  | 5026(3)     | 5174(3)   | 4226(2)    | 18.7(7)   |
| O21  | 5744(3)     | 4189(3)   | 2500.3(19) | 15.4(7)   |
| O22  | 7439(3)     | 5586(3)   | 3015.3(19) | 15.4(7)   |
| O31  | 8811(3)     | 5359(3)   | 4275(2)    | 18.7(7)   |
| O32  | 7818(3)     | 4317(3)   | 4849(2)    | 16.8(7)   |
| O33  | 7578(3)     | 5839(3)   | 4836(2)    | 19.9(8)   |
| O121 | 5890(3)     | 5653(2)   | 3338.6(19) | 13.5(6)   |
| O231 | 6789(3)     | 4519(2)   | 3732.2(18) | 12.3(6)   |
| S4   | 8303.8(10)  | 6360.8(9) | 6692.5(7)  | 16.6(2)   |
| S5   | 10097.8(9)  | 5844.5(8) | 6523.6(6)  | 11.6(2)   |
| S6   | 12132.3(10) | 7438.6(9) | 7000.8(7)  | 15.1(2)   |
| O41  | 7681(3)     | 5379(3)   | 6384(2)    | 21.9(8)   |
| O42  | 8181(3)     | 6902(3)   | 7289(2)    | 25.4(9)   |
| O43  | 8280(3)     | 6914(3)   | 6122(2)    | 20.2(8)   |
| O51  | 9730(3)     | 4885(2)   | 6555(2)    | 18.3(7)   |
| O52  | 9881(3)     | 6058(3)   | 5842.6(18) | 13.0(6)   |
| O61  | 13090(4)    | 7517(3)   | 7559(3)    | 33.7(11)  |
| O62  | 12176(4)    | 7305(3)   | 6291(2)    | 27.7(9)   |
| O63  | 11504(4)    | 8009(3)   | 7180(3)    | 29.8(10)  |
| O451 | 9591(3)     | 6447(3)   | 6998.3(19) | 15.9(7)   |
| O561 | 11308(3)    | 6303(3)   | 6999.8(19) | 15.2(7)   |
| S7   | 10270.0(11) | 9502.7(9) | 6413.5(7)  | 16.9(2)   |
| S8   | 8961.8(9)   | 9962.7(8) | 7261.4(6)  | 11.6(2)   |
| S9   | 10310.3(9)  | 9827.3(8) | 8627.9(6)  | 10.32(19) |
| O71  | 10396(4)    | 10409(3)  | 6284(2)    | 25.8(9)   |
| O72  | 9996(4)     | 8694(3)   | 5848(2)    | 28.9(9)   |
| O73  | 11251(3)    | 9583(3)   | 7044(2)    | 17.6(7)   |
| O81  | 8869(3)     | 10731(3)  | 6961(2)    | 16.8(7)   |

---

---

|      |            |           |            |         |
|------|------------|-----------|------------|---------|
| O82  | 8068(3)    | 9365(3)   | 7399(2)    | 16.9(7) |
| O91  | 11323(3)   | 10530(3)  | 9077(2)    | 17.6(7) |
| O92  | 9398(3)    | 9736(3)   | 8882(2)    | 17.5(7) |
| O93  | 10378(3)   | 8950(2)   | 8269.7(19) | 16.3(7) |
| O781 | 9257(3)    | 9228(2)   | 6731.1(19) | 15.2(7) |
| O891 | 10026(3)   | 10367(2)  | 7932.0(18) | 12.0(6) |
| S10  | 2406.1(10) | 1806.5(9) | 5564.2(7)  | 15.4(2) |
| S11  | 3666.3(9)  | 1503.2(8) | 4672.4(7)  | 13.3(2) |
| S12  | 5007.8(10) | 2745.1(8) | 4031.7(7)  | 15.5(2) |
| O1   | 5845(3)    | 2364(3)   | 4320(2)    | 20.6(8) |
| O10B | 2924(3)    | 2066(2)   | 4931(2)    | 16.2(7) |
| O11B | 3797(3)    | 1939(3)   | 4046(2)    | 20.5(8) |
| O101 | 1912(3)    | 803(3)    | 5376(2)    | 21.2(8) |
| O102 | 1785(3)    | 2420(3)   | 5599(2)    | 22.8(8) |
| O103 | 3412(3)    | 2153(3)   | 6239(2)    | 20.0(8) |
| O111 | 3007(3)    | 535(3)    | 4377(2)    | 20.3(8) |
| O112 | 4665(3)    | 1763(3)   | 5253(2)    | 16.9(7) |
| O122 | 4683(3)    | 2682(3)   | 3280(2)    | 23.0(8) |
| O123 | 5077(4)    | 3612(3)   | 4493(2)    | 24.9(9) |
| S13  | 4619.3(10) | 401.9(9)  | 8445.5(7)  | 14.4(2) |
| S14  | 5654.2(10) | -61.4(8)  | 7415.0(6)  | 12.5(2) |
| S15  | 3968.4(10) | -106.4(8) | 6147.4(7)  | 15.7(2) |
| O13B | 5423(3)    | 689(2)    | 7966.5(19) | 13.7(6) |
| O14B | 4510(3)    | -574(2)   | 6825.7(19) | 15.5(7) |
| O131 | 4793(4)    | -369(3)   | 8692(3)    | 27.6(9) |
| O132 | 4867(4)    | 1292(3)   | 8940(2)    | 25.7(9) |
| O133 | 3492(3)    | 108(3)    | 7890(2)    | 24.7(8) |
| O141 | 5903(3)    | -761(3)   | 7754(2)    | 18.7(7) |
| O142 | 6406(3)    | 513(3)    | 7154(2)    | 17.4(7) |
| O151 | 2839(3)    | -698(3)   | 5921(2)    | 24.6(9) |
| O152 | 4537(4)    | -236(3)   | 5648(2)    | 24.8(8) |
| O153 | 4220(3)    | 861(3)    | 6528(2)    | 19.4(8) |
| S16  | 6282.8(10) | 3218.3(8) | 8103.8(7)  | 14.3(2) |

---

---

|      |             |            |             |          |
|------|-------------|------------|-------------|----------|
| S17  | 4525.5(10)  | 3623.6(8)  | 8462.3(6)   | 12.9(2)  |
| S18  | 2367.2(11)  | 2199.5(10) | 8088.9(9)   | 26.9(3)  |
| O16B | 4959(3)     | 3021(2)    | 7931.1(18)  | 13.6(6)  |
| O17B | 3299(3)     | 3231(2)    | 8030(2)     | 15.9(7)  |
| O161 | 6296(3)     | 2600(3)    | 7502(2)     | 23.0(8)  |
| O162 | 6803(3)     | 4211(3)    | 8272(2)     | 20.4(8)  |
| O163 | 6602(3)     | 2846(3)    | 8761(2)     | 17.8(7)  |
| O171 | 4780(3)     | 3377(3)    | 9126.0(19)  | 15.7(7)  |
| O172 | 4907(3)     | 4591(3)    | 8445(2)     | 19.9(8)  |
| O181 | 2765(4)     | 1493(3)    | 7797(4)     | 60(2)    |
| O182 | 1392(3)     | 2269(3)    | 7633(3)     | 30.2(10) |
| O183 | 2509(4)     | 2375(4)    | 8844(3)     | 46.4(15) |
| S19  | 7249.6(10)  | 1408.2(9)  | 10629.0(7)  | 16.4(2)  |
| S20  | 8166.4(9)   | 882.2(8)   | 9578.9(6)   | 11.6(2)  |
| S21  | 9318.6(11)  | 2417.8(9)  | 9074.1(7)   | 16.2(2)  |
| O19B | 7487(3)     | 1485(3)    | 9875.7(19)  | 15.7(7)  |
| O20B | 8287(3)     | 1328(3)    | 8957.5(19)  | 14.6(7)  |
| O191 | 6521(3)     | 1930(3)    | 10629(2)    | 24.7(8)  |
| O192 | 6935(3)     | 431(3)     | 10623(2)    | 21.7(8)  |
| O193 | 8355(3)     | 1979(3)    | 11207(2)    | 19.3(7)  |
| O201 | 7461(3)     | -75(3)     | 9283(2)     | 18.5(7)  |
| O202 | 9181(3)     | 1105(3)    | 10140.6(19) | 14.1(7)  |
| O211 | 8979(4)     | 2480(3)    | 8355(2)     | 31.3(10) |
| O212 | 9086(4)     | 3046(3)    | 9585(2)     | 29.9(10) |
| O213 | 10315(3)    | 2224(3)    | 9329(3)     | 27.5(9)  |
| S22  | 7348.9(10)  | 5092.6(8)  | 141.9(7)    | 14.8(2)  |
| S23  | 8370.8(10)  | 5012.6(9)  | 1584.5(6)   | 13.5(2)  |
| S24  | 10161.8(10) | 4529.0(10) | 1302.7(7)   | 18.3(2)  |
| O22B | 8329(3)     | 5546(3)    | 975.1(19)   | 16.8(7)  |
| O23B | 8921(3)     | 4248(3)    | 1370(2)     | 16.3(7)  |
| O23T | 7318(3)     | 4460(3)    | 1550(2)     | 19.9(8)  |
| O221 | 7258(3)     | 4109(3)    | -19(2)      | 17.9(7)  |
| O222 | 6406(3)     | 5282(3)    | 241(2)      | 22.2(8)  |

---

---

|      |          |         |         |          |
|------|----------|---------|---------|----------|
| O223 | 7904(3)  | 5663(3) | -242(2) | 22.2(8)  |
| O232 | 9123(3)  | 5703(3) | 2221(2) | 20.5(8)  |
| O241 | 9904(5)  | 4641(4) | 555(3)  | 17.7(11) |
| O242 | 10895(9) | 4833(9) | 2011(6) | 20(2)    |
| O243 | 10158(9) | 3649(7) | 902(7)  | 15(2)    |
| O244 | 10261(9) | 5265(9) | 886(7)  | 20(2)    |
| O245 | 10830(5) | 5355(6) | 1806(4) | 33.8(17) |
| O246 | 10363(6) | 3634(5) | 1323(5) | 34.6(17) |

---

**Table S37:** Anisotropic Displacement Parameters ( $\text{\AA}^2 \times 10^3$ ) for  $[\text{Te}_6][\text{HS}_3\text{O}_{10}]_4\text{-II}$ . The anisotropic displacement factor exponent takes the form:  $-2\pi^2[h^2a^2U_{11}+2hka*b*U_{12}+\dots]$ .

| Atom | U <sub>11</sub> | U <sub>22</sub> | U <sub>33</sub> | U <sub>23</sub> | U <sub>13</sub> | U <sub>12</sub> |
|------|-----------------|-----------------|-----------------|-----------------|-----------------|-----------------|
| Te1  | 15.37(14)       | 14.02(14)       | 11.24(14)       | -2.54(11)       | 5.59(11)        | 0.89(11)        |
| Te2  | 12.36(14)       | 25.07(16)       | 15.48(15)       | 8.03(12)        | 4.18(11)        | 11.07(12)       |
| Te3  | 15.96(14)       | 11.45(13)       | 16.70(15)       | 2.81(11)        | 8.22(12)        | -0.95(11)       |
| Te4  | 8.52(13)        | 18.06(15)       | 20.28(16)       | 1.83(12)        | -0.03(12)       | -0.23(11)       |
| Te5  | 17.97(15)       | 17.98(15)       | 14.07(14)       | 9.87(12)        | 9.88(12)        | 10.34(12)       |
| Te6  | 18.29(15)       | 10.99(13)       | 16.65(15)       | 4.95(11)        | 9.40(12)        | 7.31(11)        |
| Te7  | 15.91(15)       | 28.11(17)       | 8.77(14)        | 3.41(12)        | 4.94(11)        | 5.91(13)        |
| Te8  | 12.86(13)       | 13.55(14)       | 17.54(15)       | 7.89(11)        | 6.09(11)        | 6.46(11)        |
| Te9  | 11.46(13)       | 12.71(14)       | 23.16(16)       | 8.79(12)        | 6.88(12)        | 1.46(11)        |
| Te10 | 19.31(15)       | 16.99(14)       | 13.44(14)       | 9.08(12)        | 8.99(12)        | 5.62(12)        |
| Te11 | 8.21(13)        | 17.78(14)       | 11.46(14)       | 0.37(11)        | 0.86(10)        | 2.35(11)        |
| Te12 | 13.97(14)       | 9.30(13)        | 19.18(15)       | 0.59(11)        | 5.42(12)        | 2.76(11)        |
| S1   | 12.2(5)         | 12.0(5)         | 17.2(6)         | 1.2(4)          | 5.6(4)          | 4.2(4)          |
| S2   | 10.9(5)         | 10.9(5)         | 9.5(5)          | 2.7(4)          | 3.5(4)          | 3.1(4)          |
| S3   | 9.5(5)          | 10.9(5)         | 9.2(5)          | 4.1(4)          | 1.7(4)          | 2.0(4)          |
| O11  | 11.1(16)        | 19.2(18)        | 22.2(19)        | 0.5(15)         | 4.7(14)         | 0.1(13)         |
| O12  | 20.4(18)        | 17.1(18)        | 30(2)           | 4.6(16)         | 10.1(16)        | 9.2(15)         |
| O13  | 24.0(19)        | 15.9(17)        | 16.8(18)        | 1.1(14)         | 9.8(15)         | 6.5(15)         |
| O21  | 14.4(16)        | 15.4(16)        | 12.8(16)        | 1.6(13)         | 1.3(13)         | 4.0(13)         |
| O22  | 16.0(16)        | 16.1(16)        | 14.8(17)        | 6.2(13)         | 7.6(13)         | 2.9(13)         |
| O31  | 11.6(16)        | 28(2)           | 14.9(17)        | 8.7(15)         | 6.1(13)         | 0.1(14)         |
| O32  | 18.9(17)        | 13.4(16)        | 16.1(17)        | 8.2(13)         | 3.4(14)         | 2.2(13)         |
| O33  | 23.6(19)        | 20.2(18)        | 12.4(17)        | -0.8(14)        | -0.8(14)        | 11.5(15)        |
| O121 | 13.6(15)        | 11.5(15)        | 17.6(17)        | 3.2(13)         | 7.5(13)         | 5.4(12)         |
| O231 | 10.9(15)        | 12.6(15)        | 10.6(15)        | 4.8(12)         | 1.2(12)         | 0.9(12)         |
| S4   | 14.9(5)         | 17.2(5)         | 16.1(6)         | -0.6(4)         | 7.8(4)          | 3.1(4)          |
| S5   | 12.6(5)         | 10.9(5)         | 10.6(5)         | 3.3(4)          | 3.8(4)          | 2.9(4)          |
| S6   | 11.6(5)         | 13.5(5)         | 15.9(5)         | 2.0(4)          | 0.3(4)          | 2.9(4)          |
| O41  | 20.1(18)        | 20.8(19)        | 23(2)           | 1.1(15)         | 13.1(16)        | 1.8(15)         |
| O42  | 20.8(19)        | 27(2)           | 25(2)           | -6.5(16)        | 13.9(17)        | 5.0(16)         |

|      |          |          |          |          |          |          |
|------|----------|----------|----------|----------|----------|----------|
| O43  | 20.5(18) | 20.4(18) | 18.9(18) | 2.6(15)  | 3.4(15)  | 10.1(15) |
| O51  | 25.1(19) | 11.0(16) | 22.0(19) | 7.4(14)  | 12.4(16) | 4.8(14)  |
| O52  | 10.7(15) | 19.6(17) | 7.7(15)  | 4.1(13)  | 3.0(12)  | 3.6(13)  |
| O61  | 20(2)    | 32(2)    | 31(2)    | 5.8(19)  | -9.2(18) | 0.0(17)  |
| O62  | 27(2)    | 26(2)    | 19(2)    | 5.0(16)  | 7.3(17)  | -6.8(17) |
| O63  | 29(2)    | 17.7(19) | 48(3)    | 8.7(19)  | 20(2)    | 10.5(17) |
| O451 | 15.5(16) | 20.2(17) | 13.2(16) | 3.1(13)  | 6.5(13)  | 6.8(14)  |
| O561 | 14.8(16) | 15.7(16) | 13.2(16) | 4.6(13)  | 0.8(13)  | 5.4(13)  |
| S7   | 18.3(6)  | 22.0(6)  | 12.3(5)  | 4.6(5)   | 6.3(4)   | 8.4(5)   |
| S8   | 10.1(5)  | 13.7(5)  | 10.3(5)  | 4.7(4)   | 2.3(4)   | 3.0(4)   |
| S9   | 10.8(5)  | 10.4(5)  | 7.9(5)   | 2.5(4)   | 1.9(4)   | 1.9(4)   |
| O71  | 29(2)    | 33(2)    | 30(2)    | 22.1(19) | 18.5(18) | 15.1(18) |
| O72  | 27(2)    | 41(3)    | 14.6(19) | -5.4(17) | 5.5(16)  | 13.0(19) |
| O73  | 16.0(17) | 14.6(16) | 18.6(18) | -0.8(14) | 3.4(14)  | 4.8(13)  |
| O81  | 17.8(17) | 19.9(17) | 14.4(17) | 9.6(14)  | 3.4(14)  | 7.9(14)  |
| O82  | 11.3(15) | 21.8(18) | 15.8(17) | 6.6(14)  | 4.6(13)  | 1.8(13)  |
| O91  | 16.0(17) | 16.2(17) | 14.2(17) | 3.8(13)  | -1.0(13) | 1.8(13)  |
| O92  | 19.3(17) | 22.7(18) | 16.6(17) | 11.2(15) | 9.3(14)  | 9.4(14)  |
| O93  | 21.8(18) | 13.4(16) | 10.9(16) | 0.2(13)  | 1.4(13)  | 7.4(14)  |
| O781 | 14.6(16) | 14.8(16) | 13.8(16) | 0.6(13)  | 4.1(13)  | 3.9(13)  |
| O891 | 12.1(15) | 13.5(15) | 8.9(15)  | 3.9(12)  | 2.9(12)  | 2.0(12)  |
| S10  | 13.1(5)  | 12.6(5)  | 19.3(6)  | 2.1(4)   | 5.3(4)   | 3.8(4)   |
| S11  | 11.3(5)  | 12.7(5)  | 14.9(5)  | 4.9(4)   | 3.8(4)   | 2.2(4)   |
| S12  | 19.3(6)  | 11.7(5)  | 12.8(5)  | 3.4(4)   | 4.8(4)   | 1.3(4)   |
| O1   | 19.2(18) | 19.0(18) | 23.0(19) | 8.1(15)  | 8.2(15)  | 2.8(14)  |
| O10B | 14.2(16) | 13.1(16) | 22.2(18) | 7.4(14)  | 5.5(14)  | 4.8(13)  |
| O11B | 14.0(17) | 23.1(19) | 17.5(18) | 8.2(15)  | 1.3(14)  | -2.3(14) |
| O101 | 22.8(19) | 10.7(16) | 27(2)    | 2.9(14)  | 11.5(16) | -1.5(14) |
| O102 | 17.2(18) | 20.4(19) | 30(2)    | 2.7(16)  | 5.3(16)  | 10.1(15) |
| O103 | 21.8(19) | 16.4(17) | 20.1(19) | 0.6(14)  | 4.1(15)  | 9.4(15)  |
| O111 | 19.4(18) | 14.4(17) | 27(2)    | 6.0(15)  | 9.4(16)  | 3.6(14)  |
| O112 | 11.9(16) | 23.1(18) | 15.8(17) | 8.2(14)  | 2.1(13)  | 6.5(14)  |
| O122 | 28(2)    | 21.7(19) | 15.1(18) | 5.4(15)  | 6.7(16)  | 2.0(16)  |

|      |          |          |          |          |          |          |
|------|----------|----------|----------|----------|----------|----------|
| O123 | 38(2)    | 15.7(18) | 22(2)    | 2.4(15)  | 13.7(18) | 8.2(16)  |
| S13  | 14.2(5)  | 17.2(5)  | 15.2(5)  | 5.5(4)   | 8.2(4)   | 6.4(4)   |
| S14  | 15.2(5)  | 14.0(5)  | 11.3(5)  | 5.2(4)   | 6.0(4)   | 6.7(4)   |
| S15  | 18.8(6)  | 11.8(5)  | 11.7(5)  | 3.5(4)   | -0.4(4)  | 2.9(4)   |
| O13B | 16.2(16) | 12.6(15) | 13.2(16) | 3.7(13)  | 7.5(13)  | 3.4(13)  |
| O14B | 19.6(17) | 12.6(15) | 12.4(16) | 5.1(13)  | 3.0(13)  | 3.8(13)  |
| O131 | 35(2)    | 32(2)    | 34(2)    | 22.7(19) | 23(2)    | 21.5(19) |
| O132 | 30(2)    | 23(2)    | 26(2)    | -0.9(16) | 18.7(18) | 4.9(16)  |
| O133 | 16.1(18) | 25(2)    | 28(2)    | -2.0(17) | 7.0(16)  | 4.5(15)  |
| O141 | 31(2)    | 17.8(17) | 16.8(18) | 10.7(14) | 12.0(16) | 15.4(15) |
| O142 | 16.2(17) | 23.0(18) | 17.7(18) | 8.9(15)  | 10.0(14) | 7.3(14)  |
| O151 | 19.1(19) | 19.3(18) | 23(2)    | 6.1(16)  | -4.7(15) | -1.0(15) |
| O152 | 38(2)    | 24(2)    | 16.9(19) | 10.2(16) | 10.8(17) | 13.1(18) |
| O153 | 20.9(18) | 12.1(16) | 20.4(19) | 4.3(14)  | -0.4(15) | 5.2(14)  |
| S16  | 17.0(5)  | 12.7(5)  | 13.9(5)  | 2.8(4)   | 7.7(4)   | 3.6(4)   |
| S17  | 13.4(5)  | 10.6(5)  | 12.6(5)  | 2.5(4)   | 3.2(4)   | 2.3(4)   |
| S18  | 14.2(6)  | 15.6(6)  | 39.8(8)  | 14.7(6)  | -6.1(5)  | -1.3(5)  |
| O16B | 15.1(16) | 14.8(16) | 10.1(15) | 3.1(12)  | 4.6(13)  | 3.6(13)  |
| O17B | 12.2(16) | 14.4(16) | 17.3(17) | 5.6(13)  | 0.6(13)  | 2.1(13)  |
| O161 | 27(2)    | 17.4(18) | 25(2)    | 1.5(15)  | 13.3(17) | 5.4(15)  |
| O162 | 19.5(18) | 16.5(17) | 24(2)    | 3.7(15)  | 11.2(15) | 1.5(14)  |
| O163 | 20.9(18) | 17.0(17) | 14.8(17) | 2.3(14)  | 4.1(14)  | 8.3(14)  |
| O171 | 14.5(16) | 21.7(18) | 10.7(16) | 3.1(13)  | 3.9(13)  | 6.8(14)  |
| O172 | 21.1(18) | 12.2(16) | 25(2)    | 3.8(14)  | 9.9(16)  | 2.5(14)  |
| O181 | 27(3)    | 13(2)    | 110(5)   | 3(3)     | -15(3)   | 5.4(19)  |
| O182 | 15.2(18) | 22(2)    | 43(3)    | 15.0(19) | -3.6(18) | 0.4(15)  |
| O183 | 24(2)    | 58(3)    | 42(3)    | 35(3)    | 0(2)     | -11(2)   |
| S19  | 16.6(5)  | 20.6(6)  | 18.4(6)  | 7.2(5)   | 10.4(5)  | 10.4(5)  |
| S20  | 10.6(5)  | 13.1(5)  | 11.8(5)  | 3.7(4)   | 4.4(4)   | 4.2(4)   |
| S21  | 22.2(6)  | 14.3(5)  | 12.2(5)  | 5.3(4)   | 6.0(5)   | 5.2(4)   |
| O19B | 18.6(17) | 21.6(18) | 14.3(16) | 7.0(14)  | 9.1(14)  | 13.5(14) |
| O20B | 15.8(16) | 16.5(16) | 10.1(15) | 4.9(13)  | 2.9(13)  | 3.6(13)  |
| O191 | 22(2)    | 32(2)    | 29(2)    | 10.0(18) | 12.7(17) | 17.7(17) |

|      |          |          |          |          |          |          |
|------|----------|----------|----------|----------|----------|----------|
| O192 | 22.9(19) | 21.2(19) | 26(2)    | 8.7(16)  | 13.3(16) | 7.7(15)  |
| O193 | 25.1(19) | 18.1(17) | 15.6(17) | 2.6(14)  | 5.0(15)  | 11.6(15) |
| O201 | 17.8(17) | 15.9(17) | 19.6(18) | 1.8(14)  | 7.5(14)  | 2.7(14)  |
| O202 | 10.9(15) | 18.4(17) | 14.3(16) | 6.1(13)  | 4.1(13)  | 6.0(13)  |
| O211 | 44(3)    | 30(2)    | 17(2)    | 14.1(17) | 6.1(18)  | 8(2)     |
| O212 | 35(2)    | 19(2)    | 29(2)    | -5.4(17) | 12.2(19) | 5.1(17)  |
| O213 | 16.8(19) | 34(2)    | 37(2)    | 17.2(19) | 13.3(18) | 7.1(17)  |
| S22  | 16.0(5)  | 13.2(5)  | 11.8(5)  | 3.2(4)   | 0.2(4)   | 4.2(4)   |
| S23  | 11.7(5)  | 16.9(5)  | 10.5(5)  | 1.3(4)   | 2.7(4)   | 5.2(4)   |
| S24  | 13.8(5)  | 28.1(7)  | 13.8(6)  | 2.9(5)   | 4.3(4)   | 9.9(5)   |
| O22B | 17.3(17) | 15.7(16) | 11.6(16) | 1.2(13)  | 0.5(13)  | 2.0(13)  |
| O23B | 13.2(16) | 15.1(16) | 20.0(18) | 2.3(14)  | 5.6(14)  | 5.3(13)  |
| O23T | 15.3(17) | 28(2)    | 16.6(18) | 5.7(15)  | 6.7(14)  | 5.7(15)  |
| O221 | 22.0(18) | 12.3(16) | 14.9(17) | 2.4(13)  | 1.5(14)  | 3.9(14)  |
| O222 | 18.9(18) | 22.1(19) | 22(2)    | 1.9(15)  | 2.1(15)  | 8.9(15)  |
| O223 | 28(2)    | 21.5(19) | 14.5(18) | 9.5(15)  | 2.1(15)  | 6.4(16)  |
| O232 | 18.1(18) | 23.6(19) | 13.0(17) | -2.2(14) | 0.3(14)  | 5.7(15)  |
| O241 | 21(3)    | 16(3)    | 14(3)    | -1(2)    | 6(2)     | 5(2)     |
| O242 | 15(5)    | 26(6)    | 15(5)    | 3(5)     | 3(4)     | 4(5)     |
| O243 | 15(5)    | 13(5)    | 23(6)    | 7(4)     | 10(5)    | 10(4)    |
| O244 | 18(5)    | 29(6)    | 25(6)    | 16(5)    | 17(5)    | 11(5)    |
| O245 | 13(3)    | 45(4)    | 27(4)    | -12(3)   | 6(3)     | -1(3)    |
| O246 | 41(4)    | 48(5)    | 37(4)    | 24(4)    | 19(4)    | 35(4)    |

---

**Table S38:** Bond Lengths for [Te<sub>6</sub>][HS<sub>3</sub>O<sub>10</sub>]<sub>4</sub>-II in pm.

| Atom | Atom | Length/pm | Atom | Atom | Length/pm |
|------|------|-----------|------|------|-----------|
| Te1  | Te2  | 271.52(5) | S11  | O11B | 153.3(4)  |
| Te1  | Te3  | 267.78(5) | S11  | O111 | 141.5(4)  |
| Te1  | Te4  | 310.85(5) | S11  | O112 | 141.7(4)  |
| Te2  | Te3  | 269.88(5) | S12  | O1   | 143.0(4)  |
| Te2  | Te5  | 301.34(5) | S12  | O11B | 175.6(4)  |
| Te3  | Te6  | 321.45(5) | S12  | O122 | 142.1(4)  |
| Te4  | Te5  | 271.56(5) | S12  | O123 | 143.9(4)  |
| Te4  | Te6  | 267.34(5) | S13  | O13B | 164.4(4)  |
| Te5  | Te6  | 270.15(4) | S13  | O131 | 139.3(4)  |
| Te7  | Te8  | 271.12(5) | S13  | O132 | 142.8(4)  |
| Te7  | Te9  | 270.44(5) | S13  | O133 | 150.8(4)  |
| Te7  | Te11 | 306.65(5) | S14  | O13B | 160.3(4)  |
| Te8  | Te9  | 268.20(4) | S14  | O14B | 155.2(4)  |
| Te8  | Te10 | 310.20(5) | S14  | O141 | 141.5(4)  |
| Te9  | Te12 | 319.19(5) | S14  | O142 | 141.4(4)  |
| Te10 | Te11 | 271.45(5) | S15  | O14B | 171.0(4)  |
| Te10 | Te12 | 267.80(5) | S15  | O151 | 143.3(4)  |
| Te11 | Te12 | 269.17(5) | S15  | O152 | 143.0(4)  |
| S1   | O11  | 142.6(4)  | S15  | O153 | 143.6(4)  |
| S1   | O12  | 141.2(4)  | S16  | O16B | 164.7(4)  |
| S1   | O13  | 152.1(4)  | S16  | O161 | 140.3(4)  |
| S1   | O121 | 164.0(4)  | S16  | O162 | 141.2(4)  |
| S2   | O21  | 141.5(4)  | S16  | O163 | 151.3(4)  |
| S2   | O22  | 140.8(4)  | S17  | O16B | 161.3(4)  |
| S2   | O121 | 160.6(4)  | S17  | O17B | 152.7(4)  |
| S2   | O231 | 155.5(3)  | S17  | O171 | 141.2(4)  |
| S3   | O31  | 142.3(4)  | S17  | O172 | 142.3(4)  |
| S3   | O32  | 142.5(4)  | S18  | O17B | 175.8(4)  |
| S3   | O33  | 143.6(4)  | S18  | O181 | 143.2(6)  |
| S3   | O231 | 173.1(4)  | S18  | O182 | 141.8(4)  |
| S4   | O41  | 142.4(4)  | S18  | O183 | 143.5(6)  |

---

|     |      |          |     |      |           |
|-----|------|----------|-----|------|-----------|
| S4  | O42  | 140.5(4) | S19 | O19B | 163.4(4)  |
| S4  | O43  | 151.9(4) | S19 | O191 | 141.7(4)  |
| S4  | O451 | 163.0(4) | S19 | O192 | 142.1(4)  |
| S5  | O51  | 142.0(4) | S19 | O193 | 152.2(4)  |
| S5  | O52  | 141.9(3) | S20 | O19B | 161.0(4)  |
| S5  | O451 | 161.2(4) | S20 | O20B | 153.1(4)  |
| S5  | O561 | 153.2(4) | S20 | O201 | 141.8(4)  |
| S6  | O61  | 141.4(4) | S20 | O202 | 142.1(4)  |
| S6  | O62  | 141.5(4) | S21 | O20B | 177.2(4)  |
| S6  | O63  | 143.2(4) | S21 | O211 | 140.8(4)  |
| S6  | O561 | 177.3(4) | S21 | O212 | 143.4(4)  |
| S7  | O71  | 141.2(4) | S21 | O213 | 142.5(4)  |
| S7  | O72  | 140.7(4) | S22 | O22B | 170.3(4)  |
| S7  | O73  | 151.4(4) | S22 | O221 | 143.7(4)  |
| S7  | O781 | 163.3(4) | S22 | O222 | 142.9(4)  |
| S8  | O81  | 141.4(4) | S22 | O223 | 143.7(4)  |
| S8  | O82  | 141.4(4) | S23 | O22B | 156.3(4)  |
| S8  | O781 | 161.2(4) | S23 | O23B | 159.7(4)  |
| S8  | O891 | 155.4(4) | S23 | O23T | 140.8(4)  |
| S9  | O91  | 141.9(4) | S23 | O232 | 141.8(4)  |
| S9  | O92  | 142.9(4) | S24 | O23B | 165.1(4)  |
| S9  | O93  | 144.1(4) | S24 | O241 | 148.5(6)  |
| S9  | O891 | 173.1(3) | S24 | O242 | 139.9(10) |
| S10 | O10B | 165.0(4) | S24 | O243 | 143.6(10) |
| S10 | O101 | 142.1(4) | S24 | O244 | 149.6(10) |
| S10 | O102 | 141.5(4) | S24 | O245 | 136.3(6)  |
| S10 | O103 | 151.6(4) | S24 | O246 | 145.9(7)  |
| S11 | O10B | 161.0(4) |     |      |           |

---

**Table S39:** Bond Angles for [Te<sub>6</sub>][HS<sub>3</sub>O<sub>10</sub>]<sub>4</sub>-II.

| Atom | Atom | Atom | Angle/°    | Atom | Atom | Atom | Angle/°  |
|------|------|------|------------|------|------|------|----------|
| Te2  | Te1  | Te4  | 89.522(13) | O103 | S10  | O10B | 103.1(2) |
| Te3  | Te1  | Te2  | 60.050(12) | O11B | S11  | O10B | 98.3(2)  |
| Te3  | Te1  | Te4  | 90.291(13) | O111 | S11  | O10B | 107.8(2) |
| Te1  | Te2  | Te5  | 90.305(13) | O111 | S11  | O11B | 107.9(2) |
| Te3  | Te2  | Te1  | 59.289(12) | O111 | S11  | O112 | 119.9(2) |
| Te3  | Te2  | Te5  | 94.167(13) | O112 | S11  | O10B | 107.4(2) |
| Te1  | Te3  | Te2  | 60.661(13) | O112 | S11  | O11B | 113.2(2) |
| Te1  | Te3  | Te6  | 89.462(13) | O1   | S12  | O11B | 104.3(2) |
| Te2  | Te3  | Te6  | 85.865(12) | O1   | S12  | O123 | 114.4(3) |
| Te5  | Te4  | Te1  | 88.311(13) | O122 | S12  | O1   | 117.7(3) |
| Te6  | Te4  | Te1  | 91.834(13) | O122 | S12  | O11B | 98.5(2)  |
| Te6  | Te4  | Te5  | 60.165(12) | O122 | S12  | O123 | 116.1(3) |
| Te4  | Te5  | Te2  | 91.538(14) | O123 | S12  | O11B | 102.0(2) |
| Te6  | Te5  | Te2  | 89.953(13) | S11  | O10B | S10  | 120.8(2) |
| Te6  | Te5  | Te4  | 59.144(12) | S11  | O11B | S12  | 126.0(2) |
| Te4  | Te6  | Te3  | 88.127(13) | O131 | S13  | O13B | 108.1(2) |
| Te4  | Te6  | Te5  | 60.692(13) | O131 | S13  | O132 | 120.9(3) |
| Te5  | Te6  | Te3  | 89.720(13) | O131 | S13  | O133 | 110.6(3) |
| Te8  | Te7  | Te11 | 90.123(13) | O132 | S13  | O13B | 102.2(2) |
| Te9  | Te7  | Te8  | 59.371(12) | O132 | S13  | O133 | 111.0(3) |
| Te9  | Te7  | Te11 | 92.794(14) | O133 | S13  | O13B | 102.0(2) |
| Te7  | Te8  | Te10 | 89.896(13) | O14B | S14  | O13B | 103.1(2) |
| Te9  | Te8  | Te7  | 60.187(13) | O141 | S14  | O13B | 109.0(2) |
| Te9  | Te8  | Te10 | 90.962(13) | O141 | S14  | O14B | 105.5(2) |
| Te7  | Te9  | Te12 | 86.998(13) | O142 | S14  | O13B | 103.9(2) |
| Te8  | Te9  | Te7  | 60.442(13) | O142 | S14  | O14B | 112.1(2) |
| Te8  | Te9  | Te12 | 88.918(12) | O142 | S14  | O141 | 121.7(2) |
| Te11 | Te10 | Te8  | 89.313(13) | O151 | S15  | O14B | 99.4(2)  |
| Te12 | Te10 | Te8  | 90.911(13) | O151 | S15  | O153 | 115.9(3) |
| Te12 | Te10 | Te11 | 59.884(12) | O152 | S15  | O14B | 104.7(2) |
| Te10 | Te11 | Te7  | 90.588(13) | O152 | S15  | O151 | 116.2(3) |

---

|      |      |      |            |      |      |      |          |
|------|------|------|------------|------|------|------|----------|
| Te12 | Te11 | Te7  | 89.824(13) | O152 | S15  | O153 | 115.2(3) |
| Te12 | Te11 | Te10 | 59.383(12) | O153 | S15  | O14B | 102.0(2) |
| Te10 | Te12 | Te9  | 89.113(13) | S14  | O13B | S13  | 124.5(2) |
| Te10 | Te12 | Te11 | 60.732(12) | S14  | O14B | S15  | 123.5(2) |
| Te11 | Te12 | Te9  | 90.305(13) | O161 | S16  | O16B | 102.1(2) |
| O11  | S1   | O13  | 111.4(2)   | O161 | S16  | O162 | 122.1(2) |
| O11  | S1   | O121 | 107.2(2)   | O161 | S16  | O163 | 109.1(2) |
| O12  | S1   | O11  | 121.9(2)   | O162 | S16  | O16B | 107.2(2) |
| O12  | S1   | O13  | 109.3(2)   | O162 | S16  | O163 | 110.9(2) |
| O12  | S1   | O121 | 102.3(2)   | O163 | S16  | O16B | 103.5(2) |
| O13  | S1   | O121 | 102.5(2)   | O17B | S17  | O16B | 99.2(2)  |
| O21  | S2   | O121 | 109.8(2)   | O171 | S17  | O16B | 107.7(2) |
| O21  | S2   | O231 | 105.4(2)   | O171 | S17  | O17B | 113.1(2) |
| O22  | S2   | O21  | 121.8(2)   | O171 | S17  | O172 | 120.0(2) |
| O22  | S2   | O121 | 102.9(2)   | O172 | S17  | O16B | 107.9(2) |
| O22  | S2   | O231 | 112.6(2)   | O172 | S17  | O17B | 106.9(2) |
| O231 | S2   | O121 | 102.76(19) | O181 | S18  | O17B | 100.4(3) |
| O31  | S3   | O32  | 116.3(2)   | O181 | S18  | O183 | 117.2(4) |
| O31  | S3   | O33  | 116.7(2)   | O182 | S18  | O17B | 97.8(2)  |
| O31  | S3   | O231 | 104.0(2)   | O182 | S18  | O181 | 116.6(3) |
| O32  | S3   | O33  | 115.4(2)   | O182 | S18  | O183 | 116.3(3) |
| O32  | S3   | O231 | 98.33(19)  | O183 | S18  | O17B | 103.4(2) |
| O33  | S3   | O231 | 101.9(2)   | S17  | O16B | S16  | 120.7(2) |
| S2   | O121 | S1   | 126.0(2)   | S17  | O17B | S18  | 124.7(2) |
| S2   | O231 | S3   | 124.1(2)   | O191 | S19  | O19B | 101.5(2) |
| O41  | S4   | O43  | 111.7(2)   | O191 | S19  | O192 | 122.0(3) |
| O41  | S4   | O451 | 107.2(2)   | O191 | S19  | O193 | 109.0(2) |
| O42  | S4   | O41  | 122.6(2)   | O192 | S19  | O19B | 107.1(2) |
| O42  | S4   | O43  | 108.1(3)   | O192 | S19  | O193 | 111.7(2) |
| O42  | S4   | O451 | 102.0(2)   | O193 | S19  | O19B | 103.5(2) |
| O43  | S4   | O451 | 103.0(2)   | O20B | S20  | O19B | 98.1(2)  |
| O51  | S5   | O451 | 108.4(2)   | O201 | S20  | O19B | 107.9(2) |
| O51  | S5   | O561 | 108.5(2)   | O201 | S20  | O20B | 108.4(2) |

---

|      |      |      |            |      |      |      |          |
|------|------|------|------------|------|------|------|----------|
| O52  | S5   | O51  | 119.5(2)   | O201 | S20  | O202 | 119.9(2) |
| O52  | S5   | O451 | 107.3(2)   | O202 | S20  | O19B | 107.1(2) |
| O52  | S5   | O561 | 112.9(2)   | O202 | S20  | O20B | 113.1(2) |
| O561 | S5   | O451 | 98.0(2)    | O211 | S21  | O20B | 97.3(2)  |
| O61  | S6   | O62  | 117.0(3)   | O211 | S21  | O212 | 116.0(3) |
| O61  | S6   | O63  | 116.3(3)   | O211 | S21  | O213 | 117.6(3) |
| O61  | S6   | O561 | 97.7(2)    | O212 | S21  | O20B | 100.9(2) |
| O62  | S6   | O63  | 116.7(3)   | O213 | S21  | O20B | 103.5(2) |
| O62  | S6   | O561 | 103.2(2)   | O213 | S21  | O212 | 116.5(3) |
| O63  | S6   | O561 | 101.0(2)   | S20  | O19B | S19  | 120.4(2) |
| S5   | O451 | S4   | 120.5(2)   | S20  | O20B | S21  | 123.3(2) |
| S5   | O561 | S6   | 122.6(2)   | O221 | S22  | O22B | 102.8(2) |
| O71  | S7   | O73  | 108.6(3)   | O222 | S22  | O22B | 104.4(2) |
| O71  | S7   | O781 | 108.2(2)   | O222 | S22  | O221 | 115.6(2) |
| O72  | S7   | O71  | 121.3(3)   | O222 | S22  | O223 | 116.0(3) |
| O72  | S7   | O73  | 111.7(2)   | O223 | S22  | O22B | 98.5(2)  |
| O72  | S7   | O781 | 102.7(2)   | O223 | S22  | O221 | 115.9(2) |
| O73  | S7   | O781 | 102.6(2)   | O22B | S23  | O23B | 103.4(2) |
| O81  | S8   | O82  | 121.5(2)   | O23T | S23  | O22B | 112.4(2) |
| O81  | S8   | O781 | 109.5(2)   | O23T | S23  | O23B | 104.1(2) |
| O81  | S8   | O891 | 106.4(2)   | O23T | S23  | O232 | 122.1(2) |
| O82  | S8   | O781 | 102.8(2)   | O232 | S23  | O22B | 104.8(2) |
| O82  | S8   | O891 | 112.6(2)   | O232 | S23  | O23B | 108.6(2) |
| O891 | S8   | O781 | 102.46(19) | O241 | S24  | O23B | 100.1(3) |
| O91  | S9   | O92  | 116.6(2)   | O242 | S24  | O23B | 105.8(5) |
| O91  | S9   | O93  | 116.1(2)   | O242 | S24  | O243 | 113.4(8) |
| O91  | S9   | O891 | 98.3(2)    | O242 | S24  | O244 | 114.7(8) |
| O92  | S9   | O93  | 115.5(2)   | O243 | S24  | O23B | 102.9(5) |
| O92  | S9   | O891 | 103.9(2)   | O243 | S24  | O244 | 111.4(7) |
| O93  | S9   | O891 | 102.50(19) | O244 | S24  | O23B | 107.5(4) |
| S8   | O781 | S7   | 125.5(2)   | O245 | S24  | O23B | 109.5(3) |
| S8   | O891 | S9   | 124.4(2)   | O245 | S24  | O241 | 112.7(5) |
| O101 | S10  | O10B | 106.7(2)   | O245 | S24  | O246 | 121.6(5) |

|      |     |      |          |      |      |      |          |
|------|-----|------|----------|------|------|------|----------|
| O101 | S10 | O103 | 111.5(2) | O246 | S24  | O23B | 99.9(3)  |
| O102 | S10 | O10B | 102.3(2) | O246 | S24  | O241 | 110.1(4) |
| O102 | S10 | O101 | 122.0(3) | S23  | O22B | S22  | 122.8(2) |
| O102 | S10 | O103 | 109.1(2) | S23  | O23B | S24  | 123.7(2) |

**Table S40:** Torsion Angles for [Te<sub>6</sub>][HS<sub>3</sub>O<sub>10</sub>]<sub>4</sub>-II.

| A    | B  | C    | D  | Angle/°   | A    | B   | C    | D   | Angle/°   |
|------|----|------|----|-----------|------|-----|------|-----|-----------|
| O11  | S1 | O121 | S2 | -35.9(3)  | O131 | S13 | O13B | S14 | 40.2(4)   |
| O12  | S1 | O121 | S2 | -165.3(3) | O132 | S13 | O13B | S14 | 168.7(3)  |
| O13  | S1 | O121 | S2 | 81.5(3)   | O133 | S13 | O13B | S14 | -76.4(3)  |
| O21  | S2 | O121 | S1 | 45.9(3)   | O141 | S14 | O13B | S13 | -47.3(3)  |
| O21  | S2 | O231 | S3 | 165.0(3)  | O141 | S14 | O14B | S15 | -166.2(3) |
| O22  | S2 | O121 | S1 | 177.0(3)  | O142 | S14 | O13B | S13 | -178.3(3) |
| O22  | S2 | O231 | S3 | 30.1(3)   | O142 | S14 | O14B | S15 | -31.6(4)  |
| O31  | S3 | O231 | S2 | -52.8(3)  | O151 | S15 | O14B | S14 | -163.2(3) |
| O32  | S3 | O231 | S2 | -172.7(3) | O152 | S15 | O14B | S14 | 76.5(3)   |
| O33  | S3 | O231 | S2 | 69.0(3)   | O153 | S15 | O14B | S14 | -44.0(3)  |
| O121 | S2 | O231 | S3 | -80.0(3)  | O16B | S17 | O17B | S18 | 86.6(3)   |
| O231 | S2 | O121 | S1 | -65.9(3)  | O17B | S17 | O16B | S16 | 175.3(2)  |
| O41  | S4 | O451 | S5 | 43.9(3)   | O161 | S16 | O16B | S17 | -176.7(3) |
| O42  | S4 | O451 | S5 | 173.9(3)  | O162 | S16 | O16B | S17 | -47.3(3)  |
| O43  | S4 | O451 | S5 | -74.0(3)  | O163 | S16 | O16B | S17 | 70.0(3)   |
| O51  | S5 | O451 | S4 | -75.6(3)  | O171 | S17 | O16B | S16 | -66.7(3)  |
| O51  | S5 | O561 | S6 | 170.2(3)  | O171 | S17 | O17B | S18 | -27.2(4)  |
| O52  | S5 | O451 | S4 | 54.7(3)   | O172 | S17 | O16B | S16 | 64.2(3)   |
| O52  | S5 | O561 | S6 | 35.4(3)   | O172 | S17 | O17B | S18 | -161.4(3) |
| O61  | S6 | O561 | S5 | 175.5(3)  | O181 | S18 | O17B | S17 | -66.4(4)  |
| O62  | S6 | O561 | S5 | -64.3(3)  | O182 | S18 | O17B | S17 | 174.6(3)  |
| O63  | S6 | O561 | S5 | 56.7(3)   | O183 | S18 | O17B | S17 | 55.1(4)   |
| O451 | S5 | O561 | S6 | -77.3(3)  | O19B | S20 | O20B | S21 | 82.5(3)   |
| O561 | S5 | O451 | S4 | 171.8(3)  | O20B | S20 | O19B | S19 | -171.9(3) |
| O71  | S7 | O781 | S8 | -35.5(4)  | O191 | S19 | O19B | S20 | -172.2(3) |
| O72  | S7 | O781 | S8 | -164.8(3) | O192 | S19 | O19B | S20 | -43.3(3)  |

---

|      |     |      |     |           |      |     |      |     |           |
|------|-----|------|-----|-----------|------|-----|------|-----|-----------|
| O73  | S7  | O781 | S8  | 79.1(3)   | O193 | S19 | O19B | S20 | 74.8(3)   |
| O81  | S8  | O781 | S7  | 52.4(3)   | O201 | S20 | O19B | S19 | 75.6(3)   |
| O81  | S8  | O891 | S9  | 160.6(3)  | O201 | S20 | O20B | S21 | -165.5(3) |
| O82  | S8  | O781 | S7  | -177.2(3) | O202 | S20 | O19B | S19 | -54.7(3)  |
| O82  | S8  | O891 | S9  | 25.3(3)   | O202 | S20 | O20B | S21 | -30.1(3)  |
| O91  | S9  | O891 | S8  | -177.1(3) | O211 | S21 | O20B | S20 | -176.6(3) |
| O92  | S9  | O891 | S8  | -56.9(3)  | O212 | S21 | O20B | S20 | -58.3(3)  |
| O93  | S9  | O891 | S8  | 63.8(3)   | O213 | S21 | O20B | S20 | 62.7(3)   |
| O781 | S8  | O891 | S9  | -84.5(3)  | O22B | S23 | O23B | S24 | 60.4(3)   |
| O891 | S8  | O781 | S7  | -60.2(3)  | O23B | S23 | O22B | S22 | 79.3(3)   |
| O1   | S12 | O11B | S11 | 44.6(4)   | O23T | S23 | O22B | S22 | -32.3(4)  |
| O10B | S11 | O11B | S12 | 108.9(3)  | O23T | S23 | O23B | S24 | 178.0(3)  |
| O11B | S11 | O10B | S10 | 173.9(3)  | O221 | S22 | O22B | S23 | -41.7(3)  |
| O101 | S10 | O10B | S11 | -48.2(3)  | O222 | S22 | O22B | S23 | 79.4(3)   |
| O102 | S10 | O10B | S11 | -177.4(3) | O223 | S22 | O22B | S23 | -160.9(3) |
| O103 | S10 | O10B | S11 | 69.4(3)   | O232 | S23 | O22B | S22 | -166.9(3) |
| O111 | S11 | O10B | S10 | 62.0(3)   | O232 | S23 | O23B | S24 | -50.6(3)  |
| O111 | S11 | O11B | S12 | -139.2(3) | O241 | S24 | O23B | S23 | -84.0(4)  |
| O112 | S11 | O10B | S10 | -68.5(3)  | O242 | S24 | O23B | S23 | 77.2(7)   |
| O112 | S11 | O11B | S12 | -4.1(4)   | O243 | S24 | O23B | S23 | -163.5(6) |
| O122 | S12 | O11B | S11 | 166.1(3)  | O244 | S24 | O23B | S23 | -45.8(6)  |
| O123 | S12 | O11B | S11 | -74.8(4)  | O245 | S24 | O23B | S23 | 34.5(5)   |
| O13B | S14 | O14B | S15 | 79.5(3)   | O246 | S24 | O23B | S23 | 163.3(4)  |
| O14B | S14 | O13B | S13 | 64.5(3)   |      |     |      |     |           |

---

**Table S41:** Hydrogen Atom Coordinates ( $\text{\AA}\times 10^4$ ) and Isotropic Displacement Parameters ( $\text{\AA}^2\times 10^3$ ) for  $[\text{Te}_6][\text{HS}_3\text{O}_{10}]_4\text{-II}$ .

| <b>Atom</b> | <b>x</b> | <b>y</b> | <b>z</b> | <b>U(eq)</b> |
|-------------|----------|----------|----------|--------------|
| H13         | 5166.81  | 5682.54  | 4532.78  | 28           |
| H43         | 8078.14  | 6535.63  | 5713.5   | 30           |
| H73         | 11269.36 | 9037.56  | 7061.78  | 26           |
| H103        | 3639.4   | 1700.67  | 6306.74  | 30           |
| H133        | 3243.75  | -486.37  | 7731.55  | 37           |
| H163        | 6784.7   | 3282.36  | 9135.97  | 27           |
| H193        | 8702.21  | 1613.02  | 11322.82 | 29           |
| H241        | 9681.81  | 4105.3   | 261.57   | 27           |
| H244        | 9659.27  | 5361.79  | 750.67   | 30           |

**Table S42:** Atomic Occupancy for  $[\text{Te}_6][\text{HS}_3\text{O}_{10}]_4\text{-II}$ .

| <b>Atom</b> | <b>Occupancy</b> | <b>Atom</b> | <b>Occupancy</b> | <b>Atom</b> | <b>Occupancy</b> |
|-------------|------------------|-------------|------------------|-------------|------------------|
| O241        | 0.6666           | H241        | 0.6666           | O242        | 0.3333           |
| O243        | 0.3333           | O244        | 0.3333           | H244        | 0.3333           |
| O245        | 0.6666           | O246        | 0.6666           |             |                  |

**[Te<sub>6</sub>][S<sub>4</sub>O<sub>13</sub>]<sub>2</sub> (7)****Table S43:** Crystallographic data of [Te<sub>6</sub>][S<sub>4</sub>O<sub>13</sub>]<sub>2</sub>.

|                                         |                                                            |
|-----------------------------------------|------------------------------------------------------------|
| Empirical formula                       | O <sub>13</sub> S <sub>4</sub> Te <sub>3</sub>             |
| Formula weight                          | 719.04 g/mol                                               |
| Temperature                             | 100.00 K                                                   |
| Crystal system                          | orthorhombic                                               |
| Space group                             | Pnma (No. 62)                                              |
|                                         | $a = 1450.91(8)$ pm                                        |
|                                         | $b = 1909.90(10)$ pm                                       |
|                                         | $c = 946.18(5)$ pm                                         |
| Unit cell dimensions                    | $\alpha = 90^\circ$                                        |
|                                         | $\beta = 90^\circ$                                         |
|                                         | $\gamma = 90^\circ$                                        |
| Volume                                  | 2622.0(2) Å <sup>3</sup>                                   |
| Z                                       | 8                                                          |
| $\rho_{\text{calc}}$                    | 3.643 g/cm <sup>3</sup>                                    |
| $\mu$                                   | 7.322 mm <sup>-1</sup>                                     |
| F(000)                                  | 2592                                                       |
| Crystal size                            | 0.04 × 0.03 × 0.02 mm <sup>3</sup>                         |
| Radiation                               | MoK $\alpha$ ( $\lambda = 0.71073$ nm)                     |
| 2 $\Theta$ range for data collection    | 4.266 to 57.4                                              |
| Index ranges                            | -19 ≤ h ≤ 19, -25 ≤ k ≤ 25, -12 ≤ l ≤ 12                   |
| Reflections collected                   | 72748                                                      |
| Independent reflections                 | 3490 [ $R_{\text{int}} = 0.0884$ , $R_{\sigma} = 0.0272$ ] |
| Completeness                            | 100%                                                       |
| Absorption correction                   | Multiscan                                                  |
| Min. and max. transmission              | 0.633 / 0.747                                              |
| Data/restraints/parameters              | 72748/0/184                                                |
| Goodness-of-fit on F <sup>2</sup>       | 1.098                                                      |
| Final R indexes [ $I \geq 2\sigma(I)$ ] | $R_1 = 0.0339$ , $wR_2 = 0.0616$                           |
| Final R indexes [all data]              | $R_1 = 0.0503$ , $wR_2 = 0.0680$                           |
| Largest diff. peak/hole                 | 1.02/-0.99 e · Å <sup>-3</sup>                             |

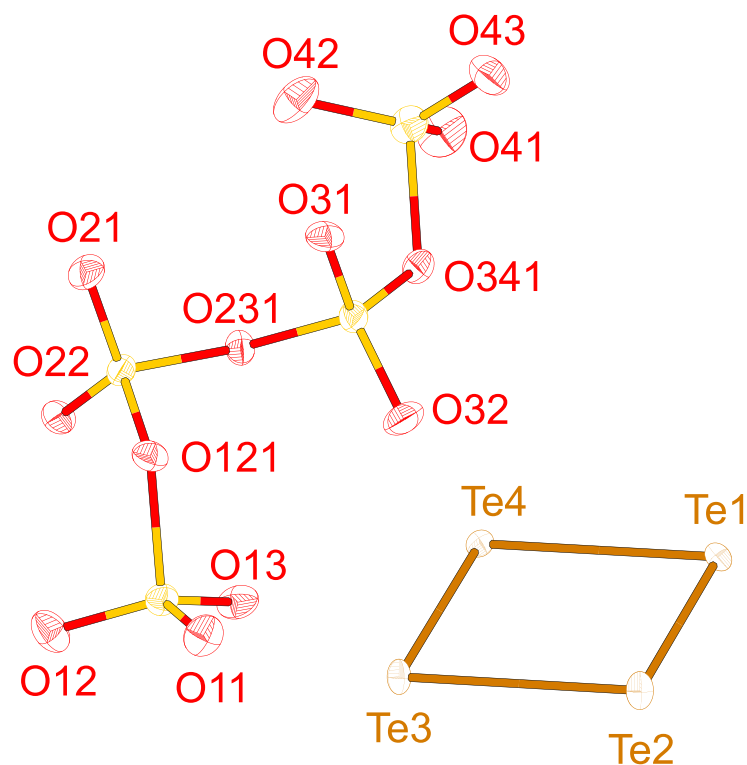

**Figure S21:** Thermal ellipsoid plot of the asymmetric unit of  $[\text{Te}_6][\text{S}_4\text{O}_{13}]_2$  shown with 50% probability.

**Table S44:** Fractional Atomic Coordinates ( $\times 10^4$ ) and Equivalent Isotropic Displacement Parameters ( $\text{\AA}^2 \times 10^3$ ) for  $[\text{Te}_6][\text{S}_4\text{O}_{13}]_2$ .  $U_{\text{eq}}$  is defined as 1/3 of the trace of the orthogonalised  $U_{ij}$  tensor.

| Atom | <i>x</i>   | <i>y</i>  | <i>z</i>   | $U_{\text{eq}}$ |
|------|------------|-----------|------------|-----------------|
| Te1  | 7604.1(3)  | 3206.0(2) | -64.1(4)   | 13.10(9)        |
| Te2  | 6912.9(4)  | 2500      | 2182.1(6)  | 14.62(12)       |
| Te3  | 4949.6(4)  | 2500      | 767.9(6)   | 13.49(12)       |
| Te4  | 5660.4(3)  | 3204.0(2) | -1472.0(4) | 12.81(9)        |
| S1   | 2816.5(11) | 3498.1(8) | 8956.0(16) | 16.0(3)         |
| S2   | 2499.3(11) | 4879.6(8) | 7803.4(16) | 15.0(3)         |
| S3   | 4415.2(10) | 5227.5(8) | 7953.6(17) | 15.9(3)         |
| S4   | 4911.3(12) | 6319.6(9) | 5994.0(17) | 20.0(3)         |
| O11  | 3133(3)    | 3358(3)   | 10352(5)   | 22.5(10)        |
| O12  | 1903(3)    | 3277(3)   | 8614(5)    | 23.7(10)        |
| O13  | 3468(3)    | 3412(2)   | 7832(5)    | 21.2(10)        |
| O21  | 2197(3)    | 5532(2)   | 8316(5)    | 21.8(10)        |
| O22  | 2002(3)    | 4515(2)   | 6737(5)    | 18.0(9)         |

|      |         |         |         |          |
|------|---------|---------|---------|----------|
| O31  | 4157(3) | 5790(2) | 8850(5) | 17.8(9)  |
| O32  | 4820(3) | 4618(2) | 8531(5) | 23.8(10) |
| O41  | 5211(4) | 6187(3) | 4589(5) | 30.7(12) |
| O42  | 3970(4) | 6492(3) | 6216(5) | 28.7(12) |
| O43  | 5554(3) | 6688(3) | 6876(5) | 26.3(11) |
| O121 | 2712(3) | 4416(2) | 9096(5) | 17.4(9)  |
| O231 | 3495(3) | 4977(2) | 7084(5) | 15.9(9)  |
| O341 | 4976(3) | 5465(2) | 6674(5) | 20.1(10) |

**Table S45:** Anisotropic Displacement Parameters ( $\text{\AA}^2 \times 10^3$ ) for  $[\text{Te}_6][\text{S}_4\text{O}_{13}]_2$ . The anisotropic displacement factor exponent takes the form:  $-2\pi^2[h^2a^2U_{11}+2hka*b*U_{12}+\dots]$ .

| Atom | $U_{11}$  | $U_{22}$  | $U_{33}$  | $U_{23}$ | $U_{13}$  | $U_{12}$  |
|------|-----------|-----------|-----------|----------|-----------|-----------|
| Te1  | 11.20(17) | 12.02(17) | 16.07(18) | 0.46(15) | -0.41(14) | -2.79(15) |
| Te2  | 11.4(3)   | 22.2(3)   | 10.3(3)   | 0        | -0.1(2)   | 0         |
| Te3  | 8.5(2)    | 19.2(3)   | 12.8(3)   | 0        | 1.7(2)    | 0         |
| Te4  | 11.70(17) | 11.72(17) | 15.02(18) | 2.53(15) | -1.12(14) | 1.22(14)  |
| S1   | 16.9(7)   | 16.1(7)   | 15.0(7)   | 2.2(6)   | -0.2(6)   | 0.5(6)    |
| S2   | 13.0(7)   | 13.9(7)   | 18.1(7)   | -2.8(6)  | -2.9(6)   | 2.0(6)    |
| S3   | 12.8(7)   | 14.7(7)   | 20.2(7)   | -3.8(6)  | -1.4(6)   | 0.0(6)    |
| S4   | 21.2(8)   | 21.9(8)   | 16.8(8)   | -0.3(6)  | 5.9(6)    | 3.1(7)    |
| O11  | 24(2)     | 27(3)     | 16(2)     | 3.3(19)  | -1.3(19)  | 3(2)      |
| O12  | 23(2)     | 28(3)     | 20(2)     | 4(2)     | -5(2)     | -9(2)     |
| O13  | 26(2)     | 17(2)     | 20(2)     | -1.1(19) | 8(2)      | 4.8(19)   |
| O21  | 20(2)     | 17(2)     | 28(3)     | -7.2(19) | 0(2)      | 4.2(19)   |
| O22  | 18(2)     | 16(2)     | 20(2)     | -3.9(18) | -5.2(18)  | -3.0(18)  |
| O31  | 23(2)     | 13(2)     | 18(2)     | -3.2(17) | -2.6(18)  | -1.4(18)  |
| O32  | 25(3)     | 16(2)     | 31(3)     | -3(2)    | -7(2)     | 7(2)      |
| O41  | 37(3)     | 38(3)     | 18(2)     | -4(2)    | 9(2)      | 5(2)      |
| O42  | 31(3)     | 34(3)     | 22(3)     | 4(2)     | 6(2)      | 15(2)     |
| O43  | 24(3)     | 22(3)     | 32(3)     | -8(2)    | 9(2)      | -6(2)     |
| O121 | 20(2)     | 14(2)     | 19(2)     | -1.5(17) | -1.3(18)  | -2.6(17)  |
| O231 | 13(2)     | 18(2)     | 17(2)     | -2.7(18) | 0.8(17)   | -0.7(17)  |
| O341 | 15(2)     | 17(2)     | 28(2)     | -4.0(19) | 4.1(19)   | 3.4(18)   |



**Table S46:** Bond Lengths for [Te<sub>6</sub>][S<sub>4</sub>O<sub>13</sub>]<sub>2</sub> in pm.

| Atom | Atom             | Length/pm | Atom | Atom | Length/pm |
|------|------------------|-----------|------|------|-----------|
| Te1  | Te1 <sup>1</sup> | 269.67(8) | S2   | O22  | 142.3(4)  |
| Te1  | Te2              | 270.93(6) | S2   | O121 | 154.1(5)  |
| Te1  | Te4              | 311.90(6) | S2   | O231 | 160.9(5)  |
| Te2  | Te3              | 314.71(8) | S3   | O31  | 141.9(5)  |
| Te3  | Te4 <sup>1</sup> | 271.35(6) | S3   | O32  | 141.3(5)  |
| Te3  | Te4              | 271.35(6) | S3   | O231 | 163.9(5)  |
| Te4  | Te4 <sup>1</sup> | 268.91(8) | S3   | O341 | 152.7(5)  |
| S1   | O11              | 142.4(5)  | S4   | O41  | 142.1(5)  |
| S1   | O12              | 142.8(5)  | S4   | O42  | 142.1(5)  |
| S1   | O13              | 143.2(5)  | S4   | O43  | 143.5(5)  |
| S1   | O121             | 176.4(5)  | S4   | O341 | 175.6(5)  |
| S2   | O21              | 140.7(5)  |      |      |           |

<sup>1</sup>+X, ½-Y, +Z**Table S47:** Bond Angles for [Te<sub>6</sub>][S<sub>4</sub>O<sub>13</sub>]<sub>2</sub>.

| Atom             | Atom | Atom | Angle/°    | Atom | Atom | Atom | Angle/°  |
|------------------|------|------|------------|------|------|------|----------|
| Te1 <sup>1</sup> | Te1  | Te2  | 60.154(11) | O21  | S2   | O231 | 108.9(3) |
| Te1 <sup>1</sup> | Te1  | Te4  | 89.930(11) | O22  | S2   | O121 | 112.5(3) |
| Te2              | Te1  | Te4  | 89.985(18) | O22  | S2   | O231 | 102.2(3) |
| Te1 <sup>1</sup> | Te2  | Te1  | 59.69(2)   | O121 | S2   | O231 | 102.9(2) |
| Te1              | Te2  | Te3  | 90.087(19) | O31  | S3   | O231 | 107.8(3) |
| Te1 <sup>1</sup> | Te2  | Te3  | 90.087(19) | O31  | S3   | O341 | 112.9(3) |
| Te4 <sup>1</sup> | Te3  | Te2  | 89.317(19) | O32  | S3   | O31  | 120.1(3) |
| Te4              | Te3  | Te2  | 89.318(19) | O32  | S3   | O231 | 107.0(3) |
| Te4 <sup>1</sup> | Te3  | Te4  | 59.41(2)   | O32  | S3   | O341 | 109.3(3) |
| Te3              | Te4  | Te1  | 90.609(18) | O341 | S3   | O231 | 97.0(2)  |
| Te4 <sup>1</sup> | Te4  | Te1  | 90.069(11) | O41  | S4   | O42  | 118.3(3) |
| Te4 <sup>1</sup> | Te4  | Te3  | 60.297(10) | O41  | S4   | O43  | 115.6(3) |
| O11              | S1   | O12  | 117.0(3)   | O41  | S4   | O341 | 99.3(3)  |
| O11              | S1   | O13  | 117.0(3)   | O42  | S4   | O43  | 115.1(3) |
| O11              | S1   | O121 | 98.3(3)    | O42  | S4   | O341 | 102.3(3) |
| O12              | S1   | O13  | 114.2(3)   | O43  | S4   | O341 | 102.0(3) |

|     |    |      |          |    |      |    |          |
|-----|----|------|----------|----|------|----|----------|
| O12 | S1 | O121 | 103.4(3) | S2 | O121 | S1 | 121.9(3) |
| O13 | S1 | O121 | 103.1(3) | S2 | O231 | S3 | 123.6(3) |
| O21 | S2 | O22  | 121.3(3) | S3 | O341 | S4 | 122.6(3) |
| O21 | S2 | O121 | 107.3(3) |    |      |    |          |

<sup>1</sup>+X, ½-Y, +Z

**Table S48:** Torsion Angles for [Te<sub>6</sub>][S<sub>4</sub>O<sub>13</sub>]<sub>2</sub>.

| A   | B  | C    | D  | Angle/°   | A    | B  | C    | D  | Angle/°   |
|-----|----|------|----|-----------|------|----|------|----|-----------|
| O11 | S1 | O121 | S2 | 172.2(3)  | O32  | S3 | O231 | S2 | 86.6(4)   |
| O12 | S1 | O121 | S2 | -67.4(4)  | O32  | S3 | O341 | S4 | -160.7(3) |
| O13 | S1 | O121 | S2 | 51.9(4)   | O41  | S4 | O341 | S3 | -156.8(4) |
| O21 | S2 | O121 | S1 | 163.0(3)  | O42  | S4 | O341 | S3 | -35.0(4)  |
| O21 | S2 | O231 | S3 | 63.1(4)   | O43  | S4 | O341 | S3 | 84.4(4)   |
| O22 | S2 | O121 | S1 | 27.0(4)   | O121 | S2 | O231 | S3 | -50.5(4)  |
| O22 | S2 | O231 | S3 | -167.3(3) | O231 | S2 | O121 | S1 | -82.3(3)  |
| O31 | S3 | O231 | S2 | -43.9(4)  | O231 | S3 | O341 | S4 | 88.5(3)   |
| O31 | S3 | O341 | S4 | -24.3(4)  | O341 | S3 | O231 | S2 | -160.7(3) |

**Table S 49:** S–O bond lengths (in pm) and  $\delta$ -values (terminal  $\text{SO}_3$ ) groups of literature-known tetrasulfate compounds.  $[\text{TS}] = [\text{S}_4\text{O}_{13}]^{2-}$ .

| Bond                | $[\text{Te}_6]$<br>[TS] <sub>2</sub> | $[\text{IBr}_2]_2$<br>[TS] <sup>[16]</sup> | $[\text{I}_3]_4$<br>[TS] <sub>2</sub> (SO <sub>3</sub> ) <sup>[16]</sup> | Ba<br>[TS] <sup>b [17]</sup> | $[\text{NO}_2]_2$<br>[TS] <sup>a [18]</sup> | Li <sub>2</sub><br>[TS] <sup>[12]</sup> |
|---------------------|--------------------------------------|--------------------------------------------|--------------------------------------------------------------------------|------------------------------|---------------------------------------------|-----------------------------------------|
| S1–O11              | 142.4(5)                             | 144.2(3)                                   | 142.8(9)–144(1)                                                          | 142.6(8)                     | 142.0                                       | 143.1(2)                                |
| S1–O12              | 142.8(5)                             | 143.3(3)                                   | 143(1)–144.3(9)                                                          | 142.7(8)                     | 142.3                                       | 142.5(2)                                |
| S1–O13              | 143.2(5)                             | 142.6(3)                                   | 143(1)–145(1)                                                            | 142.6(8)                     | 142.3                                       | 142.4(2)                                |
| $\delta(\text{S1})$ | 10.33                                | 10.96                                      | 10.52                                                                    | 9.20                         | 9.80                                        | 9.57                                    |
| S1–O121             | 176.4(5)                             | 171.3(3)                                   | 171.2(9)–174.0(9)                                                        | 178.7(8)                     | 176.6                                       | 176.5(2)                                |
| S2–O21              | 140.7(5)                             | 141.0(3)                                   | 140(1)–141.2(9)                                                          | 141.9(8)                     | 141.4                                       | 140.9(2)                                |
| S2–O22              | 142.3(4)                             | 141.2(3)                                   | 141(1)–141(1)                                                            | 142.0(8)                     | 141.1                                       | 141.0(2)                                |
| S2–O121             | 154.1(5)                             | 156.3(3)                                   | 155.6(9)–155.7(9)                                                        | 152.4(8)                     | 153.0                                       | 152.4(2)                                |
| S2–O231             | 160.9(5)                             | 161.6(3)                                   | 162(1)–163.3(9)                                                          | 161.8(5)                     | 163.9                                       | 162.8(2)                                |
| S3–O31              | 141.9(5)                             | 140.0(3)                                   | 141(1)–141.5(9)                                                          | 141.9(8)                     | 141.3                                       | 141.7(2)                                |
| S3–O32              | 141.3(5)                             | 140.4(3)                                   | 140(1)–144(1)                                                            | 142.0(8)                     | 142.0                                       | 140.9(2)                                |
| S3–O231             | 163.9(5)                             | 163.2(3)                                   | 161.3(9)–162.8(9)                                                        | 161.8(5)                     | 160.9                                       | 161.7(2)                                |
| S3–O341             | 152.7(5)                             | 155.6(3)                                   | 155.5(9)–156.7(9)                                                        | 152.4(8)                     | 153.4                                       | 153.2(2)                                |
| S4–O41              | 142.1(5)                             | 143.7(3)                                   | 142.4(9)–143.9(8)                                                        | 142.6(8)                     | 142.1                                       | 142.1(2)                                |
| S4–O42              | 142.1(5)                             | 142.5(3)                                   | 142.9(9)–146(1)                                                          | 142.7(8)                     | 143.1                                       | 141.8(2)                                |
| S4–O43              | 143.5(5)                             | 144.2(3)                                   | 142.4(9)–144.0(8)                                                        | 142.6(8)                     | 143.1                                       | 142.1(2)                                |
| $\delta(\text{S4})$ | 9.87                                 | 10.92                                      | 10.50                                                                    | 9.20                         | 9.52                                        | 9.85                                    |
| S4–O341             | 175.6(5)                             | 170.5(3)                                   | 172.3(9)–174.7(8)                                                        | 178.7(8)                     | 177.0                                       | 175.3(2)                                |

*a* – the average lengths were calculated, *b* – symmetry plane through the anion leads to  $\text{S3} = \text{S2}$  and  $\text{S4} = \text{S1}$ .

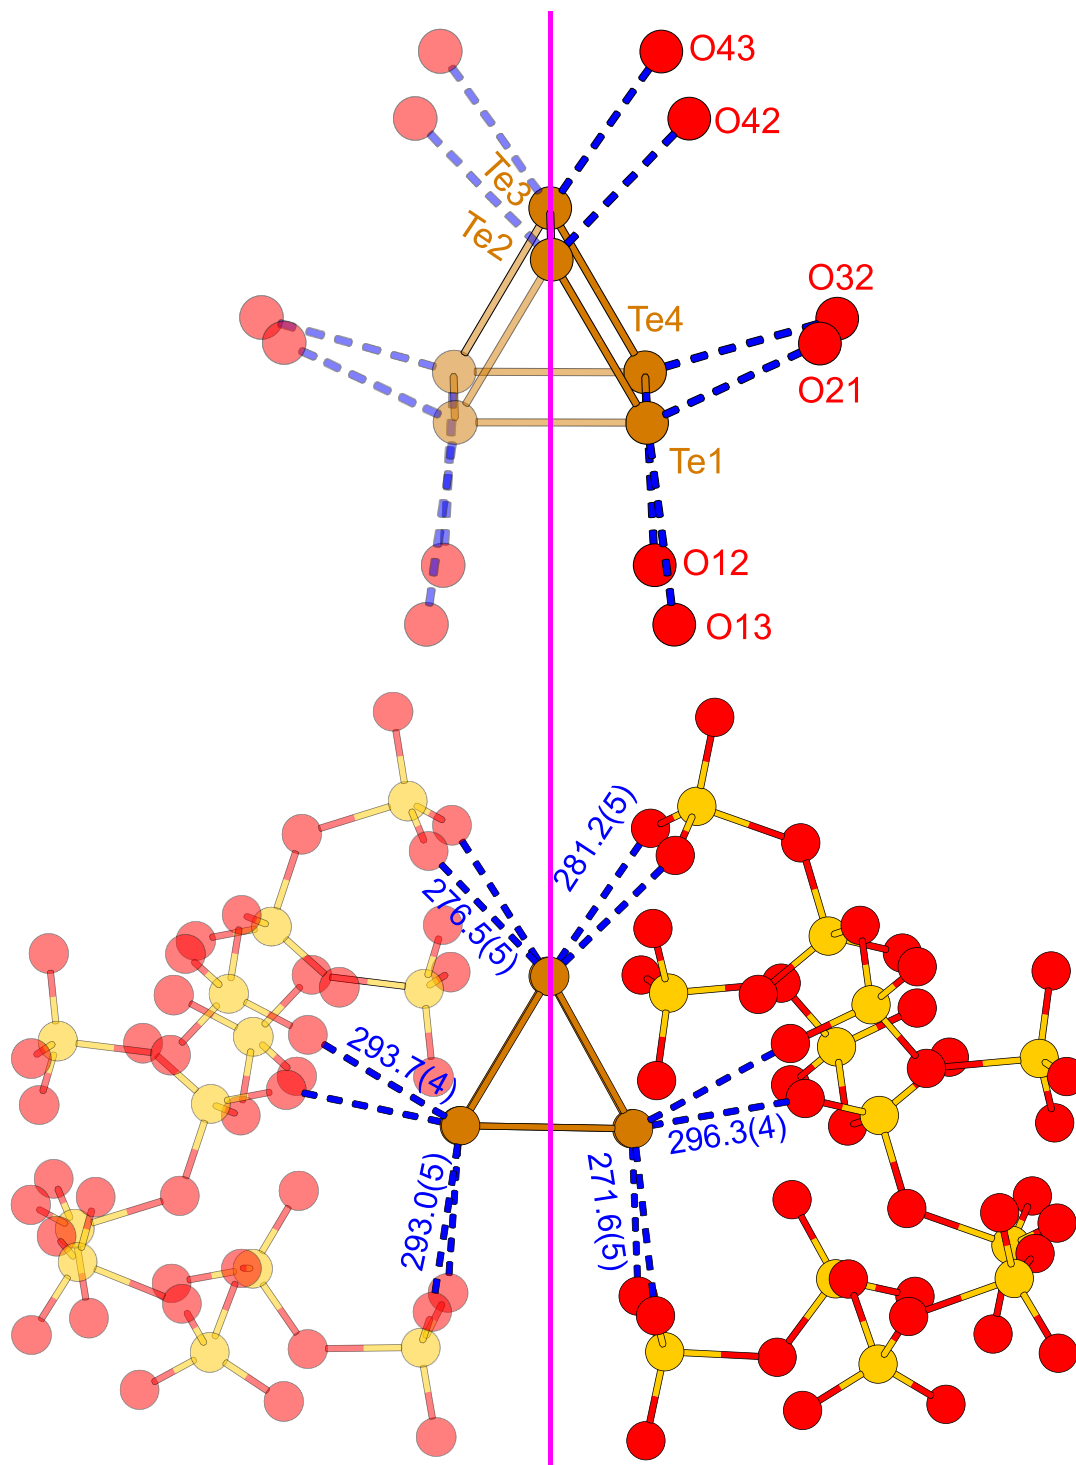

**Figure S 22:** Chalcogen-bonding (D–A distance below 300 pm) within [Te<sub>6</sub>][S<sub>4</sub>O<sub>13</sub>]<sub>2</sub>. Distances are given in pm. O–Te coordination within the two [Te<sub>6</sub>] plane is shown at the top. The atoms that are generated via the mirror plane are shown at 50% visibility. The mirror plane is indicated by the vertical magenta line.

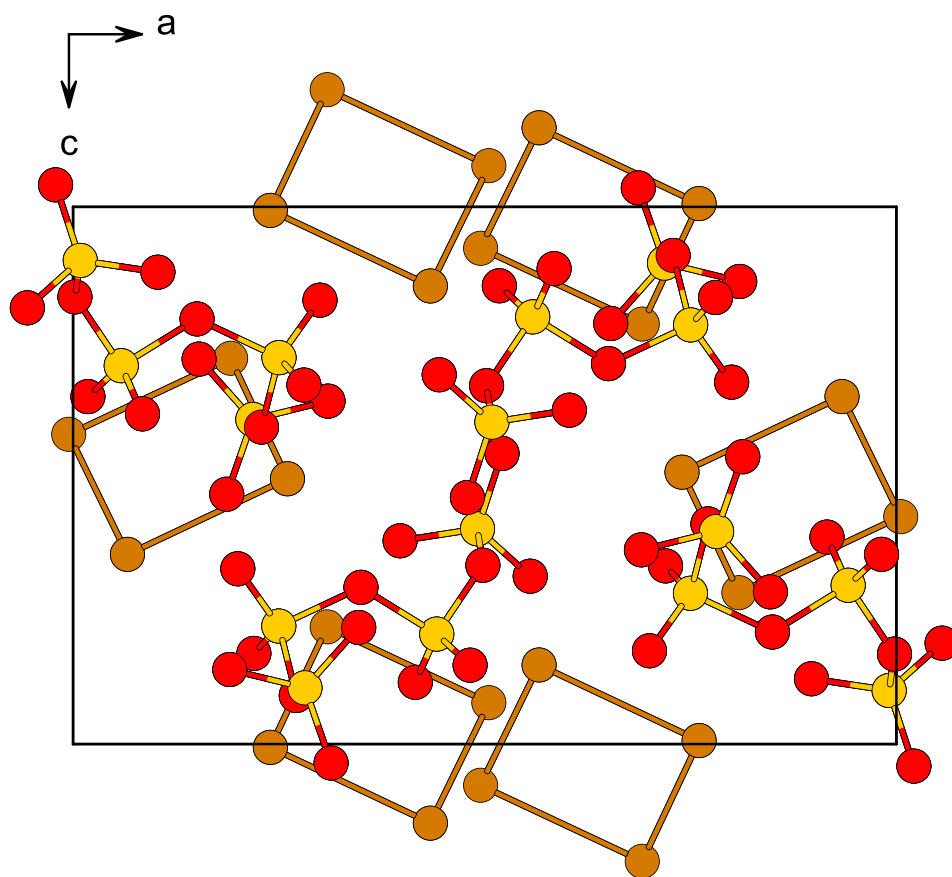

**Figure S 23:** Packed unit cell of  $[\text{Te}_6][\text{S}_4\text{O}_{13}]_2$  viewed along the crystallographic b-axis.

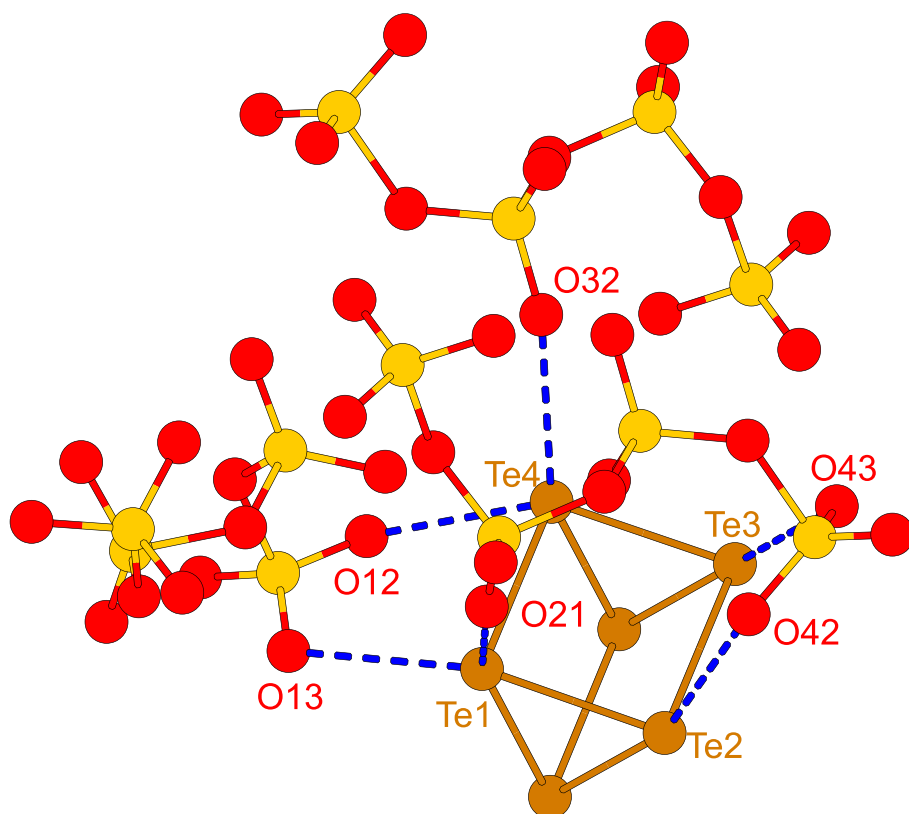

Figure S 24: Mono- and bidentate coordination of coordinating oxygen atoms and auxiliary coordination of terminal oxygen atoms within the polysulfate chain (O32) within  $[\text{Te}_6][\text{S}_4\text{O}_{13}]_2$ .

#### D. Delta Values

The delta values (in the following written as  $\delta$ ) were calculated using the Polynator software package.<sup>[19]</sup> We have described this process in more detail before.<sup>[16]</sup> Within the software, the central and ligand atoms were defined as sulfur and oxygen, respectively. The terminal  $\text{SO}_3$  units could be identified in most cases by adjusting the distance connectivity criterium to a maximum value of 1.6 Å. For the analysis, the generated  $\delta$  values for the geometric object ‘triangle[regular] ( $-6m2$ ,  $1^\circ f$ )’ were taken.

**Table S 50:** Relevant bond lengths and  $\delta$  values for the novel compounds.

| LB-S bond length [pm] | Delta (triangle) [ $\delta$ ] | CCDC/CSD | Compound / Reference                                    | Legend                                   |
|-----------------------|-------------------------------|----------|---------------------------------------------------------|------------------------------------------|
| 166                   | 12,198                        | 2477856  | $[\text{Se}_4][\text{HS}_2\text{O}_7]_2$<br>[this work] | $[\text{Se}_4][\text{HS}_2\text{O}_7]_2$ |
| 164,69                | 12,143                        | 2504489  | $[\text{Se}_4][\text{S}_2\text{O}_7]$<br>[this work]    | $[\text{Se}_4][\text{S}_2\text{O}_7]$    |
| 164,77                | 12,12                         | 2405909  | $[\text{ICl}_2][\text{HS}_2\text{O}_7]$ <sup>[16]</sup> | $[\text{ICl}_2][\text{HS}_2\text{O}_7]$  |
| 164,08                | 12,103                        | 2504489  | $[\text{Se}_4][\text{S}_2\text{O}_7]$<br>[this work]    | $[\text{Se}_4][\text{S}_2\text{O}_7]$    |
| 165,1                 | 11,965                        | 26138    | $\text{Pd}[\text{HS}_2\text{O}_7]_2$ <sup>[20]</sup>    | $\text{Pd}[\text{HS}_2\text{O}_7]_2$     |
| 168,3                 | 11,738                        | 428615   | $[\text{NO}][\text{HS}_2\text{O}_7]$ <sup>[21]</sup>    | $[\text{NO}][\text{HS}_2\text{O}_7]$     |
| 167,77                | 11,735                        | 428573   | $\text{Rb}[\text{HS}_3\text{O}_{10}]$ <sup>[22]</sup>   | $\text{Rb}[\text{HS}_3\text{O}_{10}]$    |
| 167,96                | 11,734                        | 428796   | $[\text{NH}_4][\text{HS}_2\text{O}_7]$ <sup>[21]</sup>  | $[\text{NH}_4][\text{HS}_2\text{O}_7]$   |
| 169,08                | 11,728                        | 428570   | $\text{K}[\text{HS}_3\text{O}_{10}]$ <sup>[22]</sup>    | $\text{K}[\text{HS}_3\text{O}_{10}]$     |
| 166,69                | 11,693                        | 428724   | $\text{Cs}[\text{HS}_2\text{O}_7]$ <sup>[21]</sup>      | $\text{Cs}[\text{HS}_2\text{O}_7]$       |

|        |        |         |                                                                                  |                                                                   |
|--------|--------|---------|----------------------------------------------------------------------------------|-------------------------------------------------------------------|
| 168,5  | 11,637 | 428564  | K[HS <sub>2</sub> O <sub>7</sub> ] <sup>[21]</sup>                               | K[HS <sub>2</sub> O <sub>7</sub> ]                                |
| 168,89 | 11,562 | 429114  | Rb[HS <sub>2</sub> O <sub>7</sub> ] <sup>[21]</sup>                              | Rb[HS <sub>2</sub> O <sub>7</sub> ]                               |
| 170,06 | 10,937 | 428571  | Na[HS <sub>3</sub> O <sub>10</sub> ] <sup>[22]</sup>                             | Na[HS <sub>3</sub> O <sub>10</sub> ]                              |
| 171,4  | 10,912 | 2476929 | [Te <sub>6</sub> ][HS <sub>3</sub> O <sub>10</sub> ] <sub>4</sub><br>[this work] | [Te <sub>6</sub> ][HS <sub>3</sub> O <sub>10</sub> ] <sub>4</sub> |
| 171    | 10,569 | 2476927 | [Se <sub>4</sub> ][HS <sub>3</sub> O <sub>10</sub> ] <sub>2</sub><br>[this work] | [Se <sub>4</sub> ][HS <sub>3</sub> O <sub>10</sub> ] <sub>2</sub> |
| 174,4  | 10,515 | 2476929 | [Te <sub>6</sub> ][HS <sub>3</sub> O <sub>10</sub> ] <sub>4</sub><br>[this work] | [Te <sub>6</sub> ][HS <sub>3</sub> O <sub>10</sub> ] <sub>4</sub> |
| 170,9  | 10,488 | 2476926 | [Te <sub>4</sub> ][HS <sub>3</sub> O <sub>10</sub> ] <sub>2</sub><br>[this work] | [Te <sub>4</sub> ][HS <sub>3</sub> O <sub>10</sub> ] <sub>2</sub> |
| 172,6  | 10,471 | 2476929 | [Te <sub>6</sub> ][HS <sub>3</sub> O <sub>10</sub> ] <sub>4</sub><br>[this work] | [Te <sub>6</sub> ][HS <sub>3</sub> O <sub>10</sub> ] <sub>4</sub> |
| 176,4  | 10,325 | 2502407 | [Te <sub>6</sub> ][S <sub>4</sub> O <sub>13</sub> ] <sub>2</sub><br>[this work]  | [Te <sub>6</sub> ][S <sub>4</sub> O <sub>13</sub> ] <sub>2</sub>  |
| 175,1  | 10,069 | 2476929 | [Te <sub>6</sub> ][HS <sub>3</sub> O <sub>10</sub> ] <sub>4</sub><br>[this work] | [Te <sub>6</sub> ][HS <sub>3</sub> O <sub>10</sub> ] <sub>4</sub> |
| 175,6  | 9,867  | 2502407 | [Te <sub>6</sub> ][S <sub>4</sub> O <sub>13</sub> ] <sub>2</sub><br>[this work]  | [Te <sub>6</sub> ][S <sub>4</sub> O <sub>13</sub> ] <sub>2</sub>  |

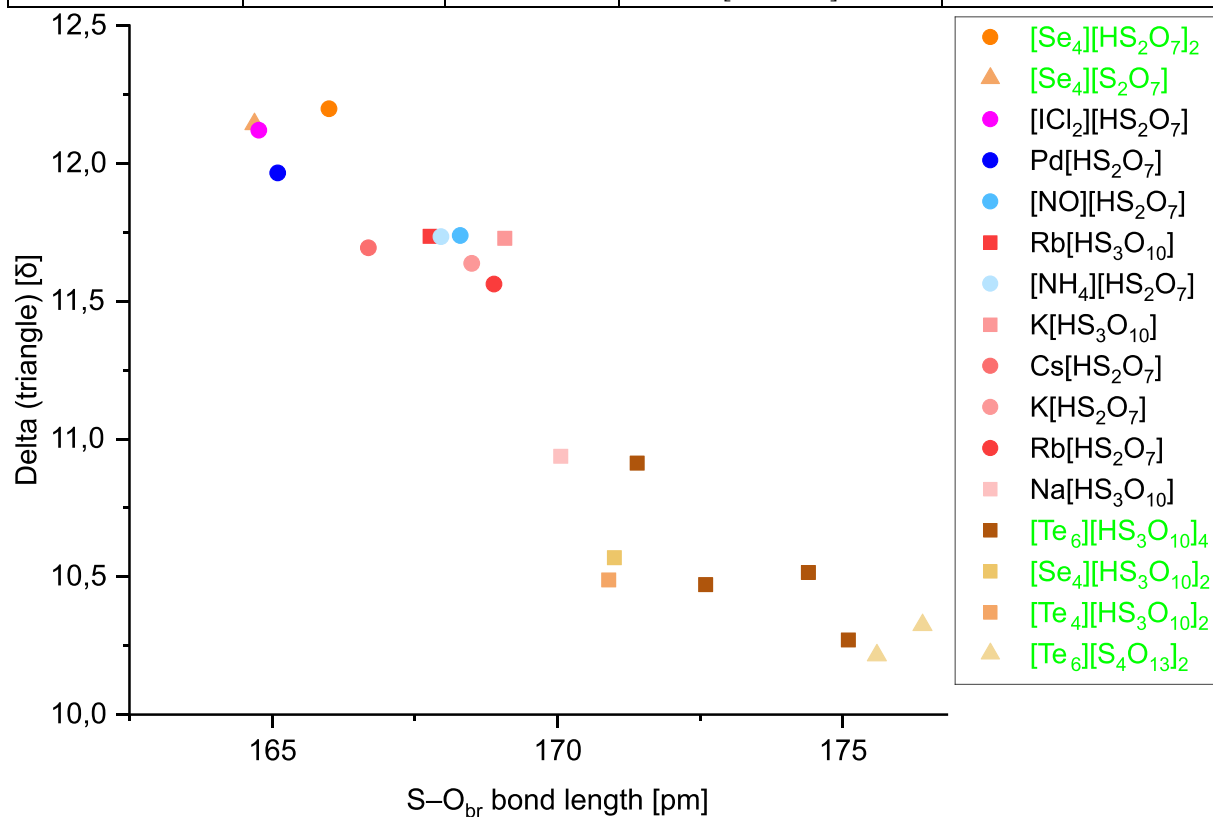

**Figure S 25:**  $\delta$  values for the different SO<sub>3</sub> units within the novel compound as a function of the respective donor-acceptor distance (i.e. the S–O–S bridging bond length).

## E. Spectroscopic investigations

All spectra were recorded with an inVia Qotor confocal Raman microscope, equipped with 10x, 50x and 100x magnification lenses, from Renishaw GmbH (Pliezhausen, GER). The spectra were measured on selected single crystals samples at room temperature using a green laser ( $\lambda = 532$  nm, 100 mW) and varying exposure times. The data was processed with the WiRE 5.1 software.<sup>[23]</sup> The data was plotted using the software OriginPro.<sup>[24]</sup>

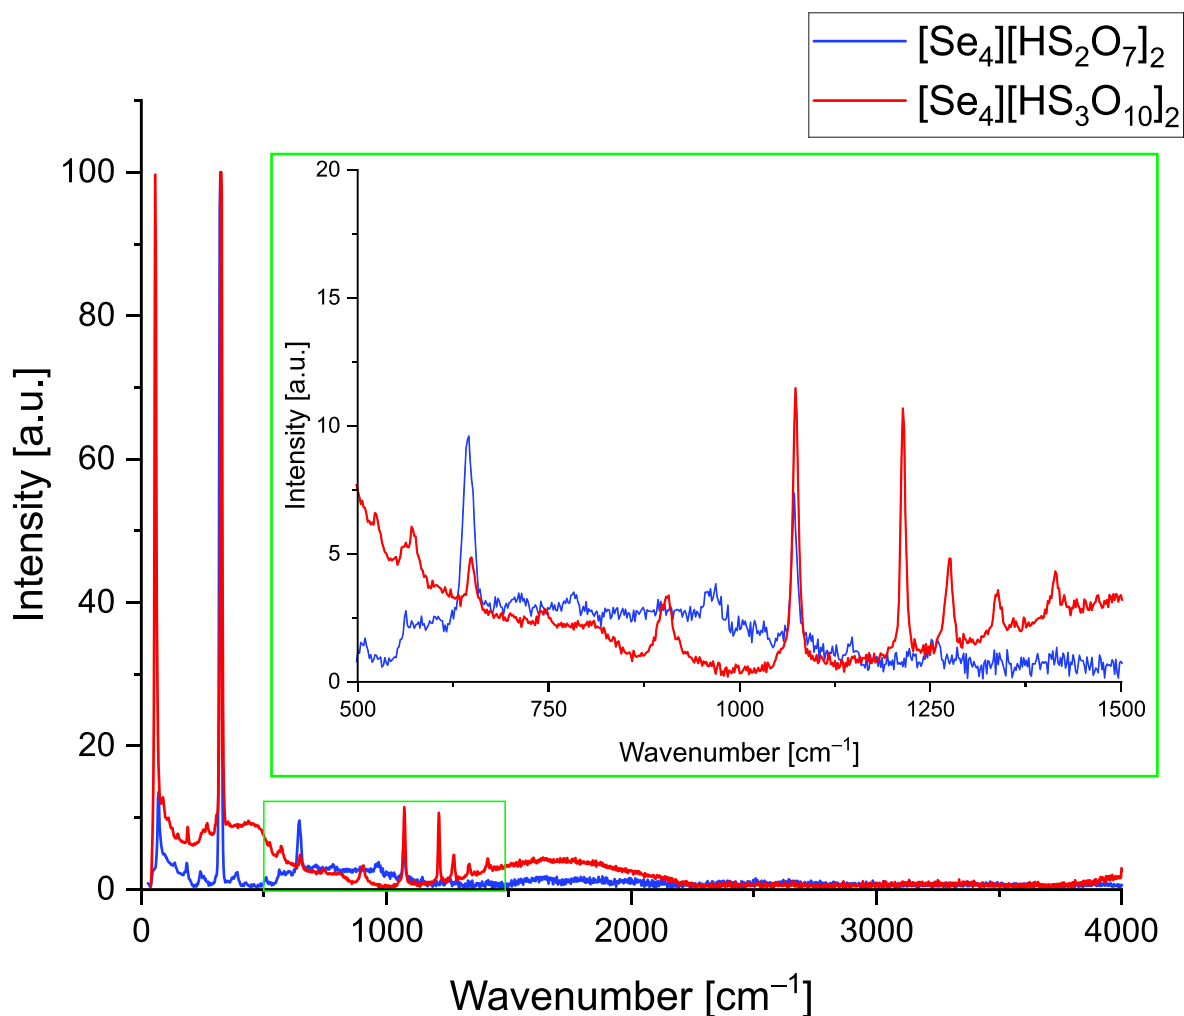

**Figure S 26:** Raman spectra of compounds 1 (blue) and 2 (red). The raw data was normalized [0,100] using the software Origin.

**Table S51:** Raman frequencies (in  $\text{cm}^{-1}$ ) of compounds **1** and **2** compared to reference compounds and previously reported values.

| $[\text{Se}_4][\text{HS}_2\text{O}_7]_2$ <sup>[25]</sup> | $[\text{Se}_4][\text{HS}_2\text{O}_7]_2$ ( <i>this work</i> ) | $[\text{Se}_4][\text{HS}_3\text{O}_{10}]_2$ ( <i>this work</i> ) | Assignment                                            |
|----------------------------------------------------------|---------------------------------------------------------------|------------------------------------------------------------------|-------------------------------------------------------|
|                                                          |                                                               | 1415                                                             |                                                       |
|                                                          |                                                               | 1338                                                             |                                                       |
|                                                          |                                                               | 1274                                                             | $\nu_{\text{as}} \text{S-O}$ <sup>[26]</sup>          |
|                                                          |                                                               | 1213                                                             |                                                       |
|                                                          | 1071                                                          | 1071                                                             | $\nu_{\text{s}} \text{S-O}$ <sup>[27]</sup>           |
|                                                          |                                                               | 907                                                              |                                                       |
|                                                          | 645                                                           | 649                                                              | $\delta_{\text{as}} \text{S-O}$ <sup>[19]</sup>       |
|                                                          | 509                                                           | 524                                                              | $\delta_{\text{s}} \text{S-O}$ <sup>[19]</sup>        |
| 487                                                      |                                                               |                                                                  | $\text{S-OH (def.)}$ <sup>[28]</sup>                  |
| 393                                                      | 392                                                           | 392                                                              |                                                       |
| 324                                                      | 322                                                           | 326                                                              |                                                       |
| 307                                                      |                                                               |                                                                  |                                                       |
| 296                                                      |                                                               | 269                                                              | $[\text{Se}_4]^{2+}$ fundamentals <sup>[25, 29]</sup> |
| 260                                                      | 240                                                           | 253                                                              |                                                       |
| 191                                                      | 185                                                           | 188                                                              |                                                       |
|                                                          |                                                               | 86                                                               |                                                       |
| 73                                                       | 71                                                            | 71                                                               |                                                       |
| 58                                                       |                                                               | 57                                                               | Lattice modes                                         |
| 46                                                       |                                                               |                                                                  |                                                       |

*as = asymmetric, s = symmetric, def. = deformation.*

## F. Computational Details

All calculations were computed using the TURBOMOLE 7.7 software package,<sup>[30]</sup> except for the NBO calculations which were obtained using the NBO 7.0<sup>[31]</sup> extension of the Gaussian16<sup>[32]</sup> software. The geometries of the calculated assemblies were taken from the crystal X-ray structures. The PBE0 hybrid functional<sup>[33]</sup> with the D4 dispersion correction<sup>[34]</sup> was employed, in conjunction with the def2-TZVP basis set.<sup>[35-36]</sup>

The quantum theory of atoms in molecules (QTAIM) analysis<sup>[37]</sup>, NCIplots<sup>[38]</sup> and the molecular electrostatic potential (MEP) cubes were obtained through the Multiwfn<sup>[39]</sup> program, using the wavefunction file obtained from the calculations. The topological parameters, including bond critical points (bcps) and electron density values, were extracted to characterize chalcogen bonding interactions.

The chalcogen bond interaction energies were obtained through an energy descriptor based on the potential energy density (V) found in a bond critical point interconnecting the chalcogen atom with the Lewis base.<sup>[40]</sup> For Se, the interaction energy was computed as:  $E_{\text{int}} = 0.375 V(\rho)$ ; and for Te, the interaction energy was computed as:  $E_{\text{int}} = 0.556 V(\rho)$ .

## Results and Discussion

We analyzed the supramolecular assemblies by characterizing the Ch $\cdots$ O chalcogen bonds (ChB) using the Quantum Theory of Atoms-In-Molecules (QTAIM) and the Non-Covalent Interaction (NCI) plot analysis (see Figure S 27). All identified Ch $\cdots$ O contacts are characterized by the presence of a bond critical point (BCPs, shown as a small red sphere) and a bond path (orange line) interconnecting the Ch (Se, Te) and O atoms. The NCI plot results, represented by the reduced density gradient (RDG) isosurfaces, are observed coincident with the BCP locations, with the color ranging from green to blue, indicating weak to moderate attractive interactions. Inspection of the QTAIM/NCIplot results reveals the existence of three primary binding modes: bifurcated Ch $\cdots$ O,O ChBs, bifurcated Ch,Ch $\cdots$ O ChBs, and standard Ch $\cdots$ O ChBs where only one donor and one acceptor atom are involved. The strength of each ChB was estimated using an energy predictor based on the QTAIM potential energy density (V), allowing for the evaluation of individual ChB contributions while minimizing the influence from the contribution of pure and non-directional ion-pair Coulombic effects.

These interaction energies (indicated in red in Figure S 27) confirm that the bifurcated Ch,Ch $\cdots$ O ChBs are the strongest stabilizing interactions in compounds **1–4**. In these compounds, the oxygen acceptor is located in the middle of a Ch–Ch bond on the molecular plane, which aligns with the high positive potential regions identified in the MEP surface analysis. The energies for these dominant bifurcated bonds are -9.4 kcal/mol in compound **4**, -7.6 kcal/mol in compound **3**, -7.8 kcal/mol in compound **2** and -6.1 kcal/mol in compound **1**. The increased energy for the [Te<sub>4</sub>]<sup>2+</sup> compound does not align with the identified decreased positive MEP but in general fits into the expectation for an increased polarization for the heavier atoms compared to [Se<sub>4</sub>]<sup>2+</sup>, as well as the decreased HOMO-LUMO gap

reported within the literature.<sup>[41]</sup> Additionally, although a decreased Lewis basicity and thus decreased cation⋯anion interactions would be expected for the  $[\text{HS}_3\text{O}_{10}]^-$  compound (**3**) compared to **1**, the energies of the bifurcated bonds show the opposite. The observed short and very narrow  $\text{O}\cdots\text{Se}$  distances within **2** and the high planarity of the respective cation are most likely caused by this increased energy. Interestingly, the ChB induced  $\text{Te}\text{--}\text{Te}$  bond elongation for the halidometalates  $\text{Te}_4[\text{SbF}_6]_2$ , and  $\text{Te}_4[\text{TaX}_6]_2$  ( $\text{X} = \text{Cl}, \text{Br}$ ) shows the same trend, whereby the less electronegative halogen (the weaker bases) show stronger cation⋯anion interactions.<sup>[42-43]</sup>

The energies of the additional, auxiliary  $\text{Se}\cdots\text{O}$  and  $\text{Te}\cdots\text{O}$  contacts in compounds **2** to **4** are a unique feature of the longer-chained (hydrogen-)polysulfates. They are very small ( $-0.7$  to  $-1.5$  kcal/mol), indicating they play only a minor role and are not structure-directing.

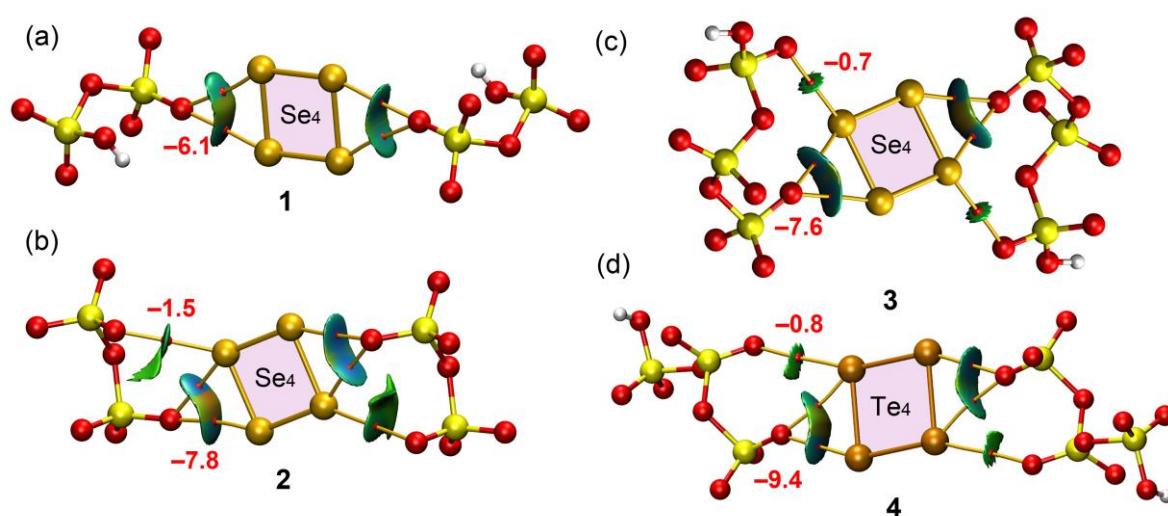

**Figure S 27:** QTAIM/NCIplot analyses of the  $\text{Ch}\cdots\text{O}$  ChBs in trimeric assemblies of **1** (a), **2** (b) and **3** (c) and **4** (d). Small red spheres represent BCPs, interconnected by orange bond paths. The green/blue isosurfaces indicate weak to moderate attractive non-covalent interactions (NCI). Interaction energies (in kcal/mol) calculated via an energy predictor based on the QTAIM potential energy density ( $V$ ) are shown in red.

The crystal packing of compound **4** presents a more complex scenario (see Figure S 28), with three anions located around the  $[\text{Te}_6]^{4+}$  cation, interacting with the three rectangular faces of the trigonal prism. The first anion is connected by two BCPs via a strong bifurcated  $\text{Te},\text{Te}\cdots\text{O}$  ChB ( $-6.5$  kcal/mol). The respective RDG isosurface spans the entire rectangular face, indicating collective participation in the interaction. This aligns with the absolute maximum potential ( $V_{s,\text{max}}$ ) identified at the center of the square faces. The second anion forms a combination of three ChBs: a weaker bifurcated  $\text{Te},\text{Te}\cdots\text{O}$  ChB ( $-2.0$  kcal/mol) and a moderately strong individual  $\text{Te}\cdots\text{O}$  ChB ( $-3.1$  kcal/mol). The third anion contributes the greatest stabilization, connected by three individual  $\text{Te}\cdots\text{O}$  ChBs resulting in a remarkably high total combined energy of  $-14.3$  kcal/mol. This dense and strong combination of interactions perfectly aligns with the large positive potential observed on the rectangular faces of the  $\text{Te}_6^{4+}$  prism in the MEP analysis. The energy of the already mentioned auxiliary  $\text{Te}\cdots\text{O}$  contacts (i.e.

coordination by oxygen atoms within the polysulfate chain, which usually have strongly decreased oxoanionic character) is strongly increased for the  $[\text{Te}_6]^{4+}$  compounds.

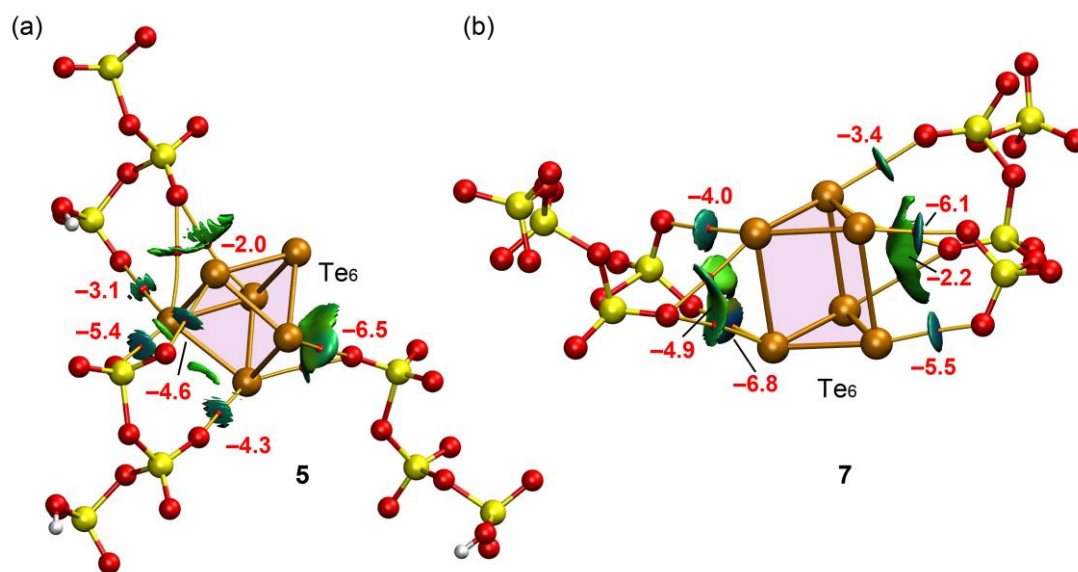

**Figure S 28:** QTAIM/NCIplot analyses of the  $\text{Te}\cdots\text{O}$  ChBs in tetrameric assemblies of **5** (a) and trimeric assembly of **7** (b). Small red spheres represent BCPs, interconnected by orange bond paths. The green/blue isosurfaces indicate weak to moderate attractive non-covalent interactions (NCI). Interaction energies (in kcal/mol) calculated via an energy predictor based on the QTAIM potential energy density ( $V$ ) are shown in red.

Compound **7**, conversely, features a predominant interaction involving two anions and the rectangular faces. The first of these two anions forms four ChBs, comprising a bifurcated  $\text{Te},\text{Te}\cdots\text{O}$  ChB ( $-4.9$  kcal/mol) alongside two notably strong individual  $\text{Te}\cdots\text{O}$  ChBs ( $-4.0$  and  $-6.8$  kcal/mol). The second anion exhibits an even higher coordination number, forming five ChBs, which consist of one bifurcated  $\text{Te},\text{Te}\cdots\text{O}$  ChB ( $-2.2$  kcal/mol) and three individual  $\text{Te}\cdots\text{O}$  ChBs ranging in strength from  $-3.4$  to  $-6.1$  kcal/mol.

Finally, we also analyzed  $\pi$ -hole ChBs in compound **1**, which are represented in Figure S 29. As suggested by the MEP analysis, the  $[\text{Se}_4]^{2+}$  dication presents two  $\pi$ -holes located above and below the molecular plane. The QTAIM analysis confirms this interaction: one oxygen atom of each anion is connected to one of the Se atoms of the square by a BCP and bond path, with an estimated interaction energy of  $-1.2$  kcal/mol. The  $\pi$ -hole nature of this ChB is visibly represented by the RDG isosurface (green in Fig. S 29a) that embraces most of the  $[\text{Se}_4]^{2+}$  square ring. Furthermore, the NBO analysis (Fig. S29b) supports this finding by showing an electron donation from the LP orbital at the closest oxygen atom of the anion to the  $\pi^*$  antibonding Se–Se orbital ( $\text{LP}(\text{O}) \rightarrow \pi^*(\text{Se}–\text{Se})$ ). Although the calculated stabilization energy ( $1.0$  kcal/mol) is modest compared to the  $\sigma$ -hole interactions described previously, it is crucial as it reveals the duality of  $[\text{Se}_4]^{2+}$  to participate in both  $\sigma$ -hole and  $\pi$ -hole non-covalent interactions.

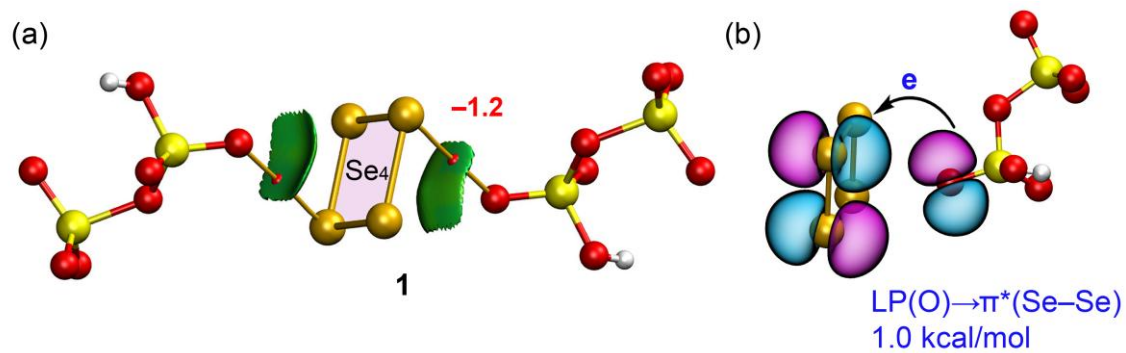

**Figure S 29:** Analysis of  $\pi$ -Hole Chalcogen Bonding in Compound **1**. (a) QTAIM/NCIplot analysis illustrating the  $\pi$ -hole interaction. (b) NBO analysis confirming the orbital contribution from the LP(O)  $\rightarrow$   $\pi^*$ (Se-Se) charge transfer, with a stabilization energy of 1.0 kcal/mol.

## References

- [1] G. Brauer, *Handbuch der Präparativen Anorganischen Chemie*, 3 ed., Ferdinand Enke Verlag, Stuttgart, **1975**.
- [2] R. King, S. Sangokoya, *Inorg. Chem.* **1987**, *26*, 2727-2730.
- [3] I. D. Brown, D. B. Crump, R. J. Gillespie, *Inorg. Chem.* **1971**, *10*, 2319-2323.
- [4] J. Langwald, L. Ebels, M. Symeonidis, J. Bruns, A. Frontera, M. S. Wickleder, *unpublished work*.
- [5] C. Logemann, J. Bruns, L. V. Schindler, V. Zimmermann, M. S. Wickleder, *Z. Anorg. Allg. Chem.* **2015**, *641*, 831-837.
- [6] Bruker AXS, *APEX 5 v2023.9-2* **2023**, Madsion, Winconsin, USA.
- [7] SmartLabStudioII, *Rigaku Corporation* **2014**, Version 4.4.295.290.
- [8] L. Krause, R. Herbst-Irmer, G. M. Sheldrick, D. Stalke, *J. Appl. Crystallogr.* **2015**, *48*, 3-10.
- [9] O. V. Dolomanov, L. J. Bourhis, R. J. Gildea, J. A. K. Howard, H. Puschmann, *J. Appl. Crystallogr.* **2009**, *42*, 339-341.
- [10] G. Sheldrick, *Acta Crystallogr. Sect. A: Found. Crystallogr.* **2015**, *71*, 3-8.
- [11] G. Sheldrick, *Acta Cryst. Sect. C* **2015**, *71*, 3-8.
- [12] Crystal Impact GbR, *Diamond 4.6.8* **2022**, Bonn, Germany.
- [13] A. Coelho, *TOPAS 64, Version 6* **2016**.
- [14] A. Coelho, *J. Appl. Crystallogr.* **2018**, *51*, 210-218.
- [15] P. Thompson, D. E. Cox, J. B. Hastings, *J. Appl. Crystallogr.* **1987**, *20*, 79-83.
- [16] J. Langwald, R. M. Gomila, D. van Gerven, A. Frontera, M. S. Wickleder, *Dalton Trans.* **2025**, *54*, 16095-16105.
- [17] J. Bruns, C. Kolb, M. S. Wickleder, *Z. Anorg. Allg. Chem.* **2014**, *640*, 2345.
- [18] C. Logemann, T. Klüner, M. S. Wickleder, *Angew. Chem. Int. Ed.* **2012**, *51*, 4997-5000.
- [19] L. Link, R. Niewa, *J. Appl. Crystallogr.* **2023**, *56*, 1855-1864.
- [20] J. Bruns, O. Niehaus, R. Pöttgen, M. S. Wickleder, *Chem. Eur. J.* **2014**, *20*, 811-814.
- [21] L. V. Schindler, M. Daub, M. Struckmann, A. Weiz, H. Hillebrecht, M. S. Wickleder, *Z. Anorg. Allg. Chem.* **2015**, *641*, 2604-2609.
- [22] L. V. Schindler, T. Klüner, M. S. Wickleder, *Chem. Eur. J.* **2016**, *22*, 13865-13870.
- [23] Renishaw plc., *WiRE 5.1* **2017**, New Mills, UK.
- [24] OriginLab Corporation, *OriginPro, Version 2024* **2024**, Northampton, MA, USA.
- [25] R. J. Gillespie, G. P. Pez, *Inorg. Chem.* **1969**, *8*, 1229-1233.
- [26] J. Bruns, T. Klüner, M. S. Wickleder, *Chemistry – An Asian Journal* **2014**, *9*, 1594-1600.
- [27] A. Simon, H. Wagner, *Z. Anorg. Allg. Chem.* **1961**, *311*, 102-109.
- [28] V. Varma, N. Rangavittal, C. N. R. Rao, *J. Solid State Chem.* **1993**, *106*, 164-173.
- [29] R. C. Burns, R. J. Gillespie, *Inorg. Chem.* **1982**, *21*, 3877-3886.
- [30] S. G. Balasubramani, G. P. Chen, S. Coriani, M. Diedenhofen, M. S. Frank, Y. J. Franzke, F. Furche, R. Grotjahn, M. E. Harding, C. Hättig, A. Hellweg, B. Helmich-Paris, C. Holzer, U. Huniar, M. Kaupp, A. Marefat Khah, S. Karbalaee Khani, T. Müller, F. Mack, B. D. Nguyen, S. M. Parker, E. Perlt, D. Rappoport, K. Reiter, S. Roy, M. Rückert, G. Schmitz, M. Sierka, E. Tapavicza, D. P. Tew, C. van Wüllen, V. K. Voora, F. Weigend, A. Wodyński, J. M. Yu, *J. Chem. Phys.* **2020**, *152*.
- [31] E. D. Glendening, C. R. Landis, F. Weinhold, *J. Comput. Chem.* **2019**, *40*, 2234-2241.
- [32] M. e. Frisch, G. Trucks, H. B. Schlegel, G. Scuseria, M. Robb, J. Cheeseman, G. Scalmani, V. Barone, G. Petersson, H. Nakatsuji, Gaussian, Inc. Wallingford, CT, **2016**.
- [33] C. Adamo, V. Barone, *J. Chem. Phys.* **1999**, *110*, 6158-6170.
- [34] E. Caldeweyher, C. Bannwarth, S. Grimme, *J. Chem. Phys.* **2017**, *147*.
- [35] F. Weigend, R. Ahlrichs, *Phys. Chem. Chem. Phys.* **2005**, *7*, 3297-3305.
- [36] F. Weigend, *Phys. Chem. Chem. Phys.* **2006**, *8*, 1057-1065.
- [37] R. F. W. Bader, *Acc. Chem. Res.* **1985**, *18*, 9-15.
- [38] J. Contreras-García, E. R. Johnson, S. Keinan, R. Chaudret, J.-P. Piquemal, D. N. Beratan, W. Yang, *J. Chem. Theory Comput.* **2011**, *7*, 625-632.
- [39] T. Lu, F. Chen, *J. Comput. Chem.* **2012**, *33*, 580-592.
- [40] A. Bauzá, A. Frontera, *ChemPhysChem* **2020**, *21*, 26-31.
- [41] K. Tanaka, T. Yamabe, H. Teramae, K. Fukui, *Inorg. Chem.* **1979**, *18*, 3591-3595.

- [42] J. Beck, G. Bock, *Z. Naturforsch. B* **1996**, *51*, 119-126.
- [43] G. Cardinal, R. J. Gillespie, J. F. Sawyer, J. E. Vekris, *J. Chem. Soc., Dalton Trans.* **1982**, 765-779.
